# Supplementary material for: SARS-CoV-2 evasion from ADAR hyper-editing is both genome-encoded and sustained by the virus replication strategy
Source: Research Square preprint supplement (doi:10.21203/rs.3.rs-314516/v2), 2021-04-12
Supplement: Supplementary file 2 [file 82b22d57b30b2ed066b3636e.xlsx]

## Sheet: All_Coronavirus
CDS	CDS from	to	Genus	NCBI ref	name	belowS A A	belowS C A	belowS G A	belowS T A	belowS A C	belowS C C	belowS G C	belowS T C	belowS A G	belowS C G	belowS G G	belowS T G	belowS A T	belowS C T	belowS G T	belowS T T	belowS W A	belowS T W	belowS RT C	belowS YT C	belowS H A	belowS W C W	repTrFrac belowS A A	repTrFrac belowS C A	repTrFrac belowS G A	repTrFrac belowS T A	repTrFrac belowS A C	repTrFrac belowS C C	repTrFrac belowS G C	repTrFrac belowS T C	repTrFrac belowS A G	repTrFrac belowS C G	repTrFrac belowS G G	repTrFrac belowS T G	repTrFrac belowS A T	repTrFrac belowS C T	repTrFrac belowS G T	repTrFrac belowS T T	repTrFrac belowS W A	repTrFrac belowS T W	repTrFrac belowS RT C	repTrFrac belowS YT C	repTrFrac belowS H A	repTrFrac belowS W C W
ORF 1a 1b	311	20439	alfa	NC002306	Feline infectious peritonitis virus	0	1	0	0	1	0	0.897	0	1	0	0	1	0	0.869	1	0.092	0	0	0.004	0	1	1	0.992	0	0.935	1	0.003	1	0.996	0.003	0.001	0.993	1	0	1	1	0	0	1	0.967	0.712	0	0.136	0
nsp 3a	24861	25076	alfa	NC002306	Feline infectious peritonitis virus	0.026	0.806	0.069	0.606	1	0.043	0.022	0.092	0.419	0.073	0.077	0.908	0.005	0.841	0.993	0.143	0.208	0.279	0.16	0.158	0.67	0.991	0.372	0.62	0.78	0.285	0.096	0.692153	0.906	0.947	0.227	0.201	0.315	0.802	1	0.371	0.023	0.024	0.277	0.977	0.719	0.898	0.468	0.421
M	26213	27001	alfa	NC002306	Feline infectious peritonitis virus	0.537	0.996	0.246	0.017	0.508	0.143	0.985	0.093	0.288	0.011	0	1	0.411	0.416	0.717	0.304	0.019	0.007	0.119	0.224	0.646	0.25	0.503	0.232	0.629	0.638	0.585	0.418	0.032	0.751	0.469	0.271	0.986	0.076	0.28	0.975	0.427	0.084	0.609	0.993	0.805	0.522	0.198	0.54
N	27014	28147	alfa	NC002306	Feline infectious peritonitis virus	0.016	1	0.918	0.003	0.999	0.233	0.045	0.104	0.739	0	0.027	1	0.025	0.933	0.919	0.067	0	0	0.016	0.75	0.059	0.998	0.833	0.566	0.269	0.757	0.214	0.249	0.976	0.708	0.04	0.866	0.942	0.082	0.935	0.725	0.019	0.605	0.827	0.951	0.978	0.148	0.881	0.044
S	20436	24794	alfa	NC002306	Feline infectious peritonitis virus	0.053	1	0	0	1	0.029	0.57	0	0.371	0	0	1	0	0.244	1	0.292	0	0	0.083	0	1	1	0.018	0.713	0.989	0.95	0.024	0.865	0.558	0.447	0.833	0.042	0.989	0.001	0.894	0.581	0.001	0.659	0.514	0.932	0.938	0.058	0.178	0
nsp 3b	25021	25236	alfa	NC002306	Feline infectious peritonitis virus	0.262	0.868	0.758	0.033	0.885	0.556	0.035	0.133	0.755	0	0.062	0.852	0.018	0.257	0.745	0.857	0.014	0.268	0.373	0.1	0.091	0.826	0.846	0.638	0.077	0.297	0.423	0.038	0.165	0.385	0.134	0.776	0.722	0.318	0.192	0.335	0.611	0.714	0.656	0.801	0.143	0.744	0.783	0.401
nsp 7b	28462	29082	alfa	NC002306	Feline infectious peritonitis virus	0.234	0.994	0.802	0.006	0.652	0.116	0.624	0.466	0.168	0	0.094	1	0.746	0.915	0.29	0.024	0	0	0.549	0.33	0.136	0.967	0.934	0.065	0.172	0.346	0.695	0.763	0.374	0.295	0.004	0.803	0.811	0.539	0.663	0.519	0.572	0.353	0.765	0.979	0.376	0.323	0.425	0.101
E	25954	26202	alfa	NC002306	Feline infectious peritonitis virus	0.021	0.741	0.073	0.902	0.1	0.943	0.887	0.03	0.269	0.014	0.594	0.908	0.99	0.22	0.164	0.071	0.423	0.448	0.062	0.097	0.787	0.006	0.218	0.076	0.84	0.987	0.934	0.228	0.022	0.106	0.293	0.906	0.595	0.179	0.025	0.935	0.734	0.384	0.971	0.146	0.456369	0.058	0.798	0.195
nsp 7a	28152	28457	alfa	NC002306	Feline infectious peritonitis virus	0.655	0.905	0.021	0.226	0.158	0.341	0.654	0.516	0.913	0.004	0.103	0.719	0.047	0.541	0.939	0.263	0.385	0.143	0.944	0.061	0.933	0.638	0.341	0.066	0.901	0.193	0.101	0.719	0.964	0.044	0.865	0.887	0.017	0.287	0.548	0.723	0.038	0.46	0.218	0.127	0.181	0.076	0.045	0.009
E	24750	24983	alfa	NC002645	Human coronavirus 229E	0.203	0.367	0.146	0.724	0.707	0.996	0.535	0.001	0.715	0	0.509	0.848	0.083	0.538	0.302	0.72	0.573	0.875	0	0.187	0.593	0.183	0.239	0.3	0.056	0.843	0.096	0.827	0.45	0.006	0.755	0.856	0.617	0.038	0.34	0.157	0.556	0.843	0.773	0	0.973	0	0.683	0.082
HCoV229Egp1	293	20568	alfa	NC002645	Human coronavirus 229E	0.032	1	0	0	1	0	0.836	0	0.618	0	0	1	0	0.438	1	0.696	0	0	0	0	1	1	0.44	0	1	1	0	1	0.028	0.996	0.207	1	1	0	0.977	1	0.037	0	1	1	0.999	0.699	0.282	0
S	20570	24091	alfa	NC002645	Human coronavirus 229E	0.32	1	0.004	0	1	0.042	1	0	0.608	0	0.003	1	0	0.6	0.727	0.967	0	0.001	0.003	0	0.995	0.982	0.281	0.091	0.746	1	0.116	0.915	0.002	0.98	0.726	0.887	0.922	0	0.279	0.393	0.951	0.131	0.999	0.939	0.908	0.895	0.685	0.13
HCoV229Egp1	293	12550	alfa	NC002645	Human coronavirus 229E	0.597	1	0	0	1	0.005	0.99	0	0.132	0	0	1	0	0.104	1	0.982	0	0	0	0	1	1	0.086	0	1	1	0	1	0.019	0.979	0.811	0.969	1	0	0.976	1	0.018	0	1	0.998	0.96	0.898	0.146	0
M	24995	25672	alfa	NC002645	Human coronavirus 229E	0.493	0.986	0.973	0	0.935	0.196	0.52	0.128	0.123	0.152	0.011	0.996	0.126	0.146	0.178	0.984	0	0.061	0.041	0.493	0.011	0.748	0.746	0.102	0.1	0.959	0.753	0.028	0.247	0.972	0.152	0.995	0.971	0.004	0.463	0.747	0.879	0.102	0.978	0.729	0.839	0.895	0.624	0.982
N	25686	26855	alfa	NC002645	Human coronavirus 229E	0.538	1	0.034	0	0.996	0.026	0.659	0.126	0.396	0	0.108	1	0.001	0.765	0.98	0.353	0	0	0.272	0.179	0.949	1	0.482	0.354	0.879	0.998	0.044	0.989	0.486	0.604	0.55	0.617	0.796	0.03	0.9	0.177	0.082	0.821	0.822	0.677	0.562	0.528	0.679	0.006
4b	24482	24748	alfa	NC002645	Human coronavirus 229E	0.385	0.788	0.596	0.068	0.984	0.252	0.018	0.195	0.639	0.151	0.382	0.449	0.001	0.383	0.74	0.899	0.054	0.621	0.016	0.777	0.182	0.758	0.692	0.19	0.036	0.977	0.158	0.971	0.817	0.296	0.333	0.639	0.641	0.193	0.977	0.005	0.35	0.714	0.983	0.169	0.128	0.509	0.935	0.457
4a	24091	24492	alfa	NC002645	Human coronavirus 229E	0.942	0.975	0.562	0	0.227	0.175	0.998	0.151	0.313	0.002	0.001	1	0.185	0.671	0.248	0.6	0.013	0.002	0.072	0.443	0.288	0.317	0.356	0.097	0.286	0.884	0.688	0.988	0.067	0.051	0.899	0.407	0.749	0.13	0.128	0.59	0.99	0.116	0.771	0.532	0.67	0.04	0.232	0.539
PEDVgp1	297	20641	alfa	NC003436	Porcine epidemic diarrhea virus	0	1	0	0	1	0.018	0.999	0	1	0	0	1	0	0.897	1	0.035	0	0	0	0	1	1	1	0	1	1	0.645	1	0.021	0.054	0	1	1	0	0.221	1	0	0.021	1	0.988	0.825	0.001	0.31	0
PEDVgp2	20638	24789	alfa	NC003436	Porcine epidemic diarrhea virus	0.001	1	0	0.001	0.996	0.182	0.982	0.001	0.988	0	0.08	1	0.02	0.225	0.955	0.808	0	0.026	0.061	0.007	1	1	0.842	0.028	0.693	0.907	0.423	0.546	0.167	0.341	0.162	0.152	0.992	0.146	0.5	0.789	0.37	0.216	0.976	0.854	0.665	0.188	0.326	0
PEDVgp3	24789	25463	alfa	NC003436	Porcine epidemic diarrhea virus	0.599	1	0.273	0.001	0.982	0	1	0.023	0.685	0.024	0.006	0.993	0	0.758	0.112	0.987	0.001	0.259	0.236	0.033	0.58	0.98	0.109	0.081	0.849	0.848	0.147	0.929	0.301	0.316	0.959	0.006	0.242	0.662	0.71	0.872	0.627	0.042	0.348	0.888	0.002	0.962	0.016	0.016
PEDVgp5	25682	26362	alfa	NC003436	Porcine epidemic diarrhea virus	0.047	0.999	0.249	0.014	0.987	0	0.805	0.776	0.595	0.012	0.072	0.993	0.103	0.958	0.662	0.082	0.002	0.002	0.786	0.467	0.624	1	0.941	0.126	0.698	0.705	0.413	1	0.051	0.295	0.029	0.921	0.754	0.398	0.215	0.036	0.543	0.97	0.961	0.497	0.253	0.49	0.472	0.645
PEDVgp6	26374	27699	alfa	NC003436	Porcine epidemic diarrhea virus	0.09	1	0.062	0.001	0.735	0.058	0.861	0.308	0.841	0	0.319	1	0.214	0.726	0.662	0.262	0	0	0.084	0.748	0.89	0.996	1	0.003	0.421	0.381	0.408	0.992	0.335	0.122	0	0.903	0.955	0.488	0.507	0.899	0.235	0.198	0.99	0.944	0.31	0.123	0.218	0.068
PEDVgp4	25444	25674	alfa	NC003436	Porcine epidemic diarrhea virus	0.145	0.046	0.29	0.937	0.372	0.971	0.631	0.015	0.836	0.09	0.312	0.389	0.231	0.486	0.346	0.579	0.878	0.934	0.021	0.109	0.454	0.066	0.2	0.343	0.299	0.917	0.937	0.207	0.409	0.001	0.803	0.848	0.079	0.099	0.007	0.369	0.843	0.797	0.829	0.006	0.234	0	0.769	0.939
HCNV63gp5	25442	26122	alfa	NC005831	Human Coronavirus NL63	0.214	0.9	0.079	0.591	0.941	0.388	0.626	0.019	0.851	0.003	0.264	0.857	0.008	0.698	0.811	0.497	0.383	0.658	0.117	0.082	0.842	0.828	0.991	0.003	0.466	0.699	0.373	0.989	0.567	0.123	0.019	0.295	0.964	0.778	0.612	0.97	0.041	0.176	0.995	0.426	0.014	0.59	0.582	0.314
HCNV63gp1	287	20475	alfa	NC005831	Human Coronavirus NL63	0.004	1	0	0	1	0.586	0.01	0	0.792	0	0	1	0	0	1	0.998	0	0	0	0	1	1	0.915	0	1	1	0	1	0.998	0.999	0.008	1	0.998	0	0.904	1	0	0	1	0.926	0.961	0.982	0.086	0
HCNV63gp2	20472	24542	alfa	NC005831	Human Coronavirus NL63	0.088	1	0.002	0	1	0.135	0.905	0	0.845	0	0.049	1	0	0.188	0.985	0.992	0	0.247	0	0.002	0.998	1	0.87	0.005	0.815	1	0.034	0.966	0.425	0.935	0.11	0.989	0.996	0.004	0.861	0.327	0.11	0.237	1	0.324	0.911	0.658	0.961	0.129
HCNV63gp6	26133	27266	alfa	NC005831	Human Coronavirus NL63	0.001	1	0.417	0.007	0.994	0.016	0.235	0.414	0.962	0	0.597	0.964	0.048	0.617	0.571	0.69	0	0.045	0.018	0.948	0.475	0.996	0.892	0.012	0.784	0.711	0.156	0.759	0.351	0.881	0.087	0.994	0.583	0.514	0.803	0.756	0.27	0.171	0.942	0.948	0.842	0.575	0.182	0.051
HCNV63gp3	24542	25219	alfa	NC005831	Human Coronavirus NL63	0.273	0.85	0.217	0.317	0.999	0.028	0.339	0.073	0.074	0.01	0.053	1	0.034	0.953	0.939	0.053	0.194	0.027	0.109	0.198	0.595	0.996	0.012	0.58	0.62	0.935	0.005	0.819	0.333	0.625	0.799	0.273	0.838	0.101	0.924	0.318	0.189	0.469	0.603	0.533	0.472	0.619	0.703	0.009
HCNV63gp4	25200	25433	alfa	NC005831	Human Coronavirus NL63	0.639	0.844	0.451	0.03	0.403	0.899	0	0.268	0.118	0	0.505	0.963	0.425	0.125	0.653	0.501	0.053	0.062	0.169	0.425	0.225	0.046	0.055	0.116	0.648	0.908	0.149	0.626	0.788	0.453	0.865	0.651	0.123	0.112	0.093	0.882	0.126	0.663	0.564	0.296	0.33033	0.424	0.225	0.06
Sc BatCoV 512 gp3	24786	25460	alfa	NC009657	Scotophilus bat coronavirus 512	0.2	0.999	0.209	0.028	0.94	0.369	0.093	0.248	0.593	0	0.026	0.998	0.069	0.339	0.999	0.231	0.006	0.007	0.411	0.214	0.669	0.866	0.301	0.066	0.578	0.975	0.044	0.693	0.706	0.25	0.545	0.998	0.875	0.022	0.783	0.852	0.037	0.431	0.93	0.261	0.123	0.567	0.425	0.05
Sc BatCoV 512 gp2	20671	24786	alfa	NC009657	Scotophilus bat coronavirus 512	0	1	0	0	1	0.04	0.781	0	0.974	0	0.028	1	0	0.201	1	0.862	0	0.029	0.066	0	1	1	0.185	0	0.998	1	0.022	0.652	0.771	0.918	0.772	0.777	0.719	0.002	0.877	0.953	0.046	0.02	1	0.33	0.753	0.922	0.258	0.078
Sc BatCoV 512 gp1	294	20674	alfa	NC009657	Scotophilus bat coronavirus 512	0	1	0	0	1	0.119	0.739	0	1	0	0	1	0	0.027	1	0.984	0	0	0	0	1	1	0.781	0	0.995	1	0	1	0.97	0.862	0.456	1	1	0	1	0.988	0	0.008	1	0.43	0.718	0.773	0.863	0
Sc BatCoV 512 gp6	26372	27556	alfa	NC009657	Scotophilus bat coronavirus 512	0.107	1	0.213	0	0.994	0.694	0.225	0.005	0.722	0	0.059	1	0.008	0.101	0.993	0.847	0	0.021	0.298	0	0.708	0.684	1	0.045	0.109	0.757	0.077	0.213	0.932	0.849	0	0.989	0.985	0.272	0.767	0.938	0.066	0.093	0.999	0.99	0.819	0.686	0.764	0.001
Sc BatCoV 512 gp4	25441	25671	alfa	NC009657	Scotophilus bat coronavirus 512	0.398	0.049	0.98	0.309	0.779	0.824	0.517	0.02	0.66	0.212	0.036	0.719	0.023	0.8	0.1	0.856	0.338	0.762	0.004	0.359	0.004	0.31	0.414	0.744	0.302	0.198	0.226	0.822	0.18	0.814	0.611	0.416	0.114	0.566	0.847	0.051	0.807	0.56	0.189	0.603	0.879	0.395	0.312	0.94
Sc BatCoV 512 gp5	25678	26361	alfa	NC009657	Scotophilus bat coronavirus 512	0.55	0.998	0.033	0.031	0.54	0.154	0.98	0.082	0.516	0.001	0.332	0.996	0.211	0.745	0.28	0.508	0.056	0.064	0.071	0.431	0.925	0.717	0.984	0.149	0.689	0.147	0.965	0.143	0.087	0.398	0.017	0.779	0.794	0.535	0.016	0.903	0.4	0.599	0.79	0.902	0.308	0.435	0.331	0.257
E	24532	24759	alfa	NC009988	Bat coronavirus HKU2	0.097	0.864	0.356	0.263	0.992	0.227	0.154	0.031	0.524	0.006	0.173	0.91	0.014	0.648	0.751	0.555	0.077	0.413	0.066	0.139	0.319	0.933	0.119	0.253	0.489	0.979	0.656	0.78	0.407	0.138	0.694	0.897384	0.188	0.203	0.933	0.042	0.294	0.703	0.945	0.271	0.389	0.098	0.857	0.549
orf1ab polyprotein	297	20479	alfa	NC009988	Bat coronavirus HKU2	0	1	0	0.03	1	0.001	1	0	1	0	0	1	0	0.926	1	0.034	0	0.001	0	0	1	1	1	0	1	1	0	1	0.224	1	0	1	1	0.186	1	1	0.192	0	1	1	0.997	0.999	0.571	0
BCHV2 gp2	297	12476	alfa	NC009988	Bat coronavirus HKU2	0	1	0	0.125	1	0.053	0.999	0	0.998	0	0	1	0	0.883	1	0.018	0	0.005	0.001	0	1	1	1	0	1	1	0	1	0.046	1	0	1	1	0.134	0.998	1	0.12	0	1	1	0.997	0.994	0.702	0
S	20476	23862	alfa	NC009988	Bat coronavirus HKU2	0	1	0.01	0.866	0.993	0.894	0.999	0	0.995	0	0.003	1	0.507	0.076	0.921	0.463	0.001	0.803	0.185	0	0.988	0.459	0.833	0.001	0.989	0.983	0.823	0.117	0.193	0.97	0.077	0.93	0.472	0.55	0.449	0.976	0.736	0.015	1	0.826	0.933	0.904	0.427	0.743
N	25469	26596	alfa	NC009988	Bat coronavirus HKU2	0.036	1	0.14	0.016	0.689	0.126	0.994	0.028	0.938	0.001	0.099	0.987	0.186	0.247	0.23	0.944	0	0.349	0.025	0.24	0.777	0.545	0.727	0.036	0.59	0.942	0.636	0.925	0	0.961	0.281	0.55	0.929	0.208	0.021	0.701	0.987	0.111	0.915	0.898	0.884	0.868	0.357	0.234
NS3	23862	24551	alfa	NC009988	Bat coronavirus HKU2	0.047	0.991	0.301	0.098	0.999	0.011	0.909	0.017	0.312	0.038	0.125	0.993	0.022	0.771	0.365	0.679	0.014	0.308	0.178	0.016	0.523	0.794	0.921	0.084	0.423	0.195	0.221	0.919	0.131	0.766	0.004	0.474	0.851	0.684	0.899	0.38	0.417	0.252	0.71	0.903	0.633	0.736	0.174	0.23
NS7a	26608	26907	alfa	NC009988	Bat coronavirus HKU2	0.015	0.434	0.568	0.483	0.903	0.801	0.966	0	0.158	0	0.471	0.995	0.172	0.864	0.004	0.723	0.251	0.785	0.003	0.04	0.067	0.234	0.78	0.028	0.004	0.437	0.133	0.855	0.059	0.508	0.005	0.265	0.701	0.809	0.952	0.834	0.916	0	0.981	0.975	0.201	0.77	0.694	0.111
M	24768	25457	alfa	NC009988	Bat coronavirus HKU2	0.25	0.968	0.748	0.008	0.68	0.047	0.849	0.491	0.886	0.001	0.002	0.999	0.086	0.94	0.513	0.203	0.002	0.005	0.572	0.35	0.13	0.925	0.438	0.347	0.483	0.844	0.303	0.844	0.851	0.023	0.638	0.006	0.864	0.524	0.643	0.773	0.102	0.485	0.795	0.664	0.172	0.065	0.534	0.005
ORF1ab	272	13078	alfa	NC010437	Bat coronavirus 1A	0	1	0.002	0	1	0	0.991	0	0.997	0	0	1	0	0.988	1	0	0	0	0.512	0	0.998	1	0.524	0	0.995	1	0.001	1	0.399	0.059	0.017	0.963	1	0	1	0.744	0.003	0.009	1	1	0.147	0.325	0.024	0
S	21071	25198	alfa	NC010437	Bat coronavirus 1A	0.209	1	0.115	0	1	0	0.504	0	0.591	0	0	1	0	0.618	0.999	0.816	0	0	0.157	0.005	0.853	1	0.915	0.049	0.78	1	0.006	0.939	0.361	0.937	0.048	0.999	0.984	0.001	0.623	0.54	0.229	0.337	1	1	0.59	0.981	0.788	0
E	25851	26075	alfa	NC010437	Bat coronavirus 1A	0.946	0.553	0.144	0.059	0.961	0.137	0.23	0.05	0.151	0.218	0.038	0.919	0	0.538	0.96	0.688	0.462	0.261	0.416	0.004	0.631	0.869	0.366	0.771	0	0.826	0.627	0.228	0.615	0.848	0.885	0	0.385	0.345	0.597	0.845	0.779	0.035	0.687	0.796	0.804805	0.633	0.895	0.615
M	26082	26849	alfa	NC010437	Bat coronavirus 1A	0.148	0.997	0.83	0.001	0.865	0.074	0.862	0.139	0.561	0.015	0.04	0.999	0.24	0.424	0.132	0.85	0.001	0.047	0.033	0.562	0.108	0.847	0.781	0.165	0.154	0.955	0.709	0.713	0.191	0.8	0.142	0.641	0.872	0.2	0.329	0.972	0.871	0.028	0.976	0.737	0.271	0.815	0.572	0.473
ORF3	25198	25857	alfa	NC010437	Bat coronavirus 1A	0.142	0.997	0.666	0.005	0.858	0.133	0.837	0.101	0.404	0.005	0.002	1	0.329	0.459	0.559	0.442	0.001	0.019	0.272	0.126	0.202	0.697	0.66	0.005	0.113	1	0.78	0.872	0.047	0.768	0.166	0.991	0.976	0.033	0.396	0.987	0.781	0.004	1	0.453	0.828	0.42	0.589	0.866
N	26870	28039	alfa	NC010437	Bat coronavirus 1A	0.005	1	0.949	0.005	0.981	0	0.973	0.595	0.864	0	0	1	0.064	1	0.17	0.002	0	0	0.72	0.311	0.028	1	0.987	0.11	0.084	0.921	0.005	0.997	0.201	0.462	0.008	1	0.996	0.068	0.881	0.853	0.825	0.077	0.994	0.971	0.625	0.315	0.929	0
ORF1ab	272	21069	alfa	NC010437	Bat coronavirus 1A	0	1	0	0	1	0	0.999	0	1	0	0	1	0	1	1	0	0	0	0.219	0	1	1	0.695	0	0.999	1	0	1	0.254	0.103	0.002	0.97	1	0	1	0.943	0.004	0.001	1	1	0.463	0.13	0.013	0
N	26770	28038	alfa	NC010438	Bat coronavirus HKU8	0.013	1	0.663	0	0.915	0.063	0.978	0.027	0.927	0	0.002	1	0.136	0.83	0.395	0.396	0	0	0.046	0.194	0.272	0.975	0.999	0.005	0.247	0.843	0.135	0.985	0.142	0.744	0.005	0.766	0.999	0.361	0.721	0.906	0.447	0.055	0.992	0.996	0.69	0.599	0.462	0.046
ORF3	25083	25751	alfa	NC010438	Bat coronavirus HKU8	0.576	1	0.085	0.004	0.074	0.182	0.998	0.173	0.031	0	0.432	1	0.993	0.511	0.014	0.256	0.009	0.003	0.139	0.416	0.802	0.658	0.542	0.026	0.679	0.988	0.995	0.737	0.063	0.373	0.09	0.976	0.511	0.174	0.298	0.716	0.966	0.232	0.972	0.872	0.638	0.168	0.344	0.828
ORF1ab	270	12965	alfa	NC010438	Bat coronavirus HKU8	0	1	0	0	1	0.507	1	0	1	0	0	1	0	0.007	1	0.478	0	0.001	0	0	1	0.917	1	0	1	1	0.171	0.793	0.024	0.985	0	0.995	1	0.001	0.426	1	0.073	0	1	1	0.996	0.773	0.023	0.039
M	25966	26721	alfa	NC010438	Bat coronavirus HKU8	0.904	0.971	0.101	0.014	0.338	0.124	0.995	0.144	0.032	0.071	0.366	0.99	0.643	0.503	0.079	0.616	0.136	0.068	0.194	0.274	0.83	0.159	0.391	0.566	0.383	0.793	0.736	0.907	0.001	0.943	0.473	0.138	0.924	0.282	0.332	0.645	0.926	0.14	0.713	0.851	0.898	0.757	0.702	0.813
E	25735	25959	alfa	NC010438	Bat coronavirus HKU8	0.256	0.971	0.141	0.067	0.657	0.03	0.966	0.09	0.825	0.037	0.246	0.67	0.054	0.535	0.101	0.9	0.057	0.574	0.08	0.309	0.655	0.7	0.563	0.312	0.097	0.858	0.054	0.926	0.044	0.934	0.486	0.887	0.172	0.252	0.621	0.072	0.968	0.292	0.915	0.67	0.421	0.853	0.869	0.412
ORF7	27788	28534	alfa	NC010438	Bat coronavirus HKU8	0.943	0.997	0.295	0	0.622	0.749	0.768	0.022	0.257	0	0.092	1	0.032	0.435	0.63	0.819	0.007	0.015	0.008	0.31	0.579	0.267	0.652	0.196	0.583	0.855	0.04	0.454	0.659	0.918	0.444	0.17	0.191	0.568	0.821	0.37	0.627	0.233	0.797	0.991	0.331	0.924	0.595	0.207
ORF1ab	270	20959	alfa	NC010438	Bat coronavirus HKU8	0	1	0	0	1	0.221	1	0	1	0	0	1	0	0.007	1	0.24	0	0	0	0	1	1	1	0	1	1	0.307	0.986	0.144	0.894	0	1	1	0	0.342	1	0.006	0	1	0.998	0.988	0.341	0.065	0.002
S	20956	25083	alfa	NC010438	Bat coronavirus HKU8	0	1	0.031	0	0.748	0.682	1	0	0.947	0	0	1	0.698	0.041	0.744	0.634	0	0	0.147	0	0.958	0.754	0.959	0.009	0.509	0.87	0.945	0.104	0.005	0.872	0.019	0.389	0.936	0.292	0.264	0.552	0.923	0.09	0.987	0.999	0.503	0.983	0.237	0.133
D425 gp9	27986	28216	alfa	NC018871	Rousettus bat coronavirus HKU10	0.439	0.908	0.703	0.006	0.162	0.714	0.795	0.067	0.251	0.194	0.038	0.971	0.802	0.007	0.19	0.858	0.032	0.119	0.008	0.594	0.156	0.163	0.012	0.28	0.394	0.589	0.787	0.749	0.19	0.159	0.974	0.763	0.742	0.016	0.2	0.625	0.559	0.573	0.14	0	0.516	0.279	0.241	0.884
D425 gp1	303	20644	alfa	NC018871	Rousettus bat coronavirus HKU10	0.012	1	0	0	1	0	0.638	0	0.579	0	0	1	0	0.027	1	0.924	0	0	0	0	1	1	0.008	0	1	1	0	1	0.831	1	0.85	0.656	1	0	0.994	1	0	0	1	0.997	1	0.566	0.332	0
D425 gp3	24690	25346	alfa	NC018871	Rousettus bat coronavirus HKU10	0.317	1	0.042	0.005	0.969	0.127	0.954	0.005	0.205	0	0.044	1	0.101	0.847	0.779	0.169	0.005	0.001	0.004	0.087	0.903	0.988	0.081	0.323	0.941	0.319	0.184	0.116	0.385	0.995	0.77	0.815	0.34	0.099	0.848	0.942	0.174	0.028	0.044	0.999	0.87	0.966	0.012	0.149
D425 gp2	20641	24690	alfa	NC018871	Rousettus bat coronavirus HKU10	0.208	1	0	0	1	0.042	0.092	0	0.494	0	0	1	0	0.001	1	0.999	0	0.037	0	0	1	1	0.033	0.011	1	1	0.025	0.642	0.985	0.93	0.909	0.249	0.979	0.003	0.934	0.987	0	0.031	1	0.399	0.997	0.133	0.313	0.001
D425 gp6	26308	27516	alfa	NC018871	Rousettus bat coronavirus HKU10	0.81	1	0.22	0	0.991	0	0.976	0.12	0.085	0	0.031	1	0.001	0.991	0.449	0.316	0.001	0	0.124	0.333	0.689	1	0.646	0.281	0.809	0.609	0.15	0.999	0	0.851	0.369	0.854	0.882	0.003	0.727	0.301	0.824	0.463	0.173	0.993	0.744	0.7	0.029	0.01
D425 gp7	27532	27777	alfa	NC018871	Rousettus bat coronavirus HKU10	0.166	0.73	0.362	0.268	0.923	0.037	0.68	0.107	0.227	0.088	0.374	0.814	0.115	0.831	0.185	0.51	0.151	0.411	0.37	0.097	0.31	0.52	0.849	0.089	0.013	0.735	0.669	0.733	0.136	0.736	0.015	0.846231	0.339	0.58	0.277	0.636	0.926	0.101	0.914	0.807	0.264	0.877	0.708	0.764
D425 gp8	27787	28248	alfa	NC018871	Rousettus bat coronavirus HKU10	0.408	1	0.195	0.002	0.872	0.158	0.405	0.299	0.544	0	0.335	1	0.033	0.736	0.743	0.358	0.004	0.003	0.091	0.644	0.676	0.997	0.853	0.13	0.354	0.743	0.004	0.826	0.765	0.714	0.14	0.947	0.417	0.095	0.965	0.562	0.485	0.067	0.829	0.927	0.255	0.779	0.121	0.028
D425 gp5	25608	26297	alfa	NC018871	Rousettus bat coronavirus HKU10	0.999	1	0.002	0	0.944	0.139	0.959	0.008	0.032	0.003	0.001	1	0	0.299	0.991	0.818	0.029	0.003	0.244	0.015	0.987	0.782	0.33	0.822	0.488	0.05	0.082	0.719	0.169	0.59	0.902	0	0.977	0.357	0.952	0.31	0.303	0.286	0.092	0.999	0.132	0.904	0.267	0.073
D425 gp4	25375	25602	alfa	NC018871	Rousettus bat coronavirus HKU10	0.857	0.843	0.033	0.042	0.105	0.384	0.987	0.074	0.459	0	0	0.968	0.148	0.62	0.215	0.623	0.247	0.136	0.237	0.048	0.786	0.375	0.585	0.134	0.335	0.486	0.159	0.688	0.123	0.249	0.643	0	0.105	0.168	0.199	0.63	0.529	0.604	0.664	0.687	0.17017	0.322613	0.309	0.222
M	25539	26219	alfa	NC022103	Bat coronavirus CDPHE15 USA	0.386	0.982	0.301	0.025	0.672	0.005	1	0.101	0.515	0.001	0.006	1	0.205	0.988	0.165	0.135	0.03	0.007	0.392	0.08	0.539	0.932	0.463	0.644	0.096	0.814	0.571	0.99	0.059	0.074	0.538	0.123	0.998	0.089	0.401	0.131	0.569	0.832	0.791	0.421	0.11	0.255	0.824	0.041
PP1a	80	12562	alfa	NC022103	Bat coronavirus CDPHE15 USA	0	1	0	0	1	0.055	0.997	0	0.983	0	0	1	0	0.256	1	0.206	0	0	0	0	1	1	0.998	0	1	1	0	0.983	0.415	0.984	0	1	1	0	1	1	0	0	1	1	0.993	0.689	0.207	0
PP1ab	80	20556	alfa	NC022103	Bat coronavirus CDPHE15 USA	0	1	0	0	1	0.041	0.995	0	1	0	0	1	0	0.411	1	0.017	0	0	0	0	1	1	1	0	1	1	0	1	0.256	0.875	0	1	1	0	0.966	1	0.002	0	1	1	0.944	0.609	0.497	0
S	20553	24647	alfa	NC022103	Bat coronavirus CDPHE15 USA	0.275	1	0	0	1	0.366	0.994	0	0.491	0	0.024	1	0	0.088	0.996	0.963	0	0.03	0.002	0	1	0.986	0.362	0.002	0.97	1	0.021	0.963	0.484	0.825	0.524	0.674	0.63	0.033	0.891	0.973	0.514	0.001	1	0.975	0.981	0.175	0.339	0.006
N	26230	27507	alfa	NC022103	Bat coronavirus CDPHE15 USA	0.002	1	0.293	0	1	0.047	0.65	0.001	0.95	0	0.029	1	0	0.498	0.942	0.971	0	0.142	0	0.14	0.604	0.964	1	0.008	0.202	0.86	0.013	0.987	0.726	0.76	0	0.819	0.979	0.764	0.967	0.826	0.113	0.06	1	0.976	0.364	0.727	0.605	0.026
NS3	24647	25324	alfa	NC022103	Bat coronavirus CDPHE15 USA	0	1	0.495	0.073	0.984	0.084	0.468	0.141	0.941	0	0.098	0.995	0.057	0.824	0.721	0.33	0	0.063	0.683	0.042	0.346	0.997	0.969	0.099	0.106	0.452	0.071	0.417	0.486	0.61	0.02	0.999	0.774	0.539	0.533	0.773	0.477	0.112	0.912	0.816	0.035	0.968	0.417	0.095
E	25308	25532	alfa	NC022103	Bat coronavirus CDPHE15 USA	0.175	0.158	0.377	0.793	0.22	0.268	0.763	0.425	0.996	0	0.397	0.304	0.049	0.998	0.087	0.2	0.638	0.484	0.193	0.642	0.334	0.742	0.881	0.902	0.348	0.647	0.789	0.479	0.218	0.503	0.342	0	0.052	0.88	0.087	0.194	0.948	0.472	0.863	0.736	0.326	0.579	0.989	0.406
CN73 gp10	28033	28647	alfa	NC023760	Mink coronavirus strain WD1127	0.923	0.498	0	0.619	0.507	0.6	0.038	0.59	0.342	0	0.693	0.985	0.042	0.984	1	0	0.958	0.009	0.495	0.54	0.998	0.883	0.745	0.168	0.8	0.262	0.17	0.961	0.932	0.007	0.532	0.007	0.357	0.389	0.092	0.677	0.238	0.884	0.482	0.545	0.001	0.243	0.19	0
CN73 gp01	273	20320	alfa	NC023760	Mink coronavirus strain WD1127	0	1	0	0	1	0.008	0.435	0	0.99	0	0	1	0	0.019	1	0.803	0	0	0	0	1	1	0.214	0	1	1	0	0.995	0.707	0.994	0.368	0.753	1	0	1	1	0	0	1	1	1	0.462	0.001	0
CN73 gp04	24656	25399	alfa	NC023760	Mink coronavirus strain WD1127	0.224	0.852	0.007	0.838	0.996	0.206	0.269	0.03	0.869	0.19	0.007	0.754	0	0.42	1	0.35	0.698	0.715	0.101	0.116	0.985	0.919	0.172	0.057	0.955	0.963	0.063	0.863	0.479	0.918	0.784	0.508	0.877	0.043	0.937	0.917	0.237	0.007	0.879	0.415	0.973	0.318	0.493	0.47
CN73 gp02	273	12329	alfa	NC023760	Mink coronavirus strain WD1127	0.001	1	0	0	1	0.011	0.745	0	0.927	0	0	1	0	0.258	1	0.598	0	0	0.006	0	1	1	0.141	0	1	1	0.001	0.996	0.539	0.874	0.591	0.354	1	0.001	0.994	1	0	0.001	1	0.995	0.992	0.17	0.001	0
CN73 gp07	26454	27584	alfa	NC023760	Mink coronavirus strain WD1127	0.025	0.977	0.519	0.39	1	0.011	0.461	0.005	0.944	0	0.005	1	0	0.997	0.979	0.152	0.028	0.143	0.004	0.188	0.397	0.991	0.623	0.62	0.727	0.131	0.002	0.971	0.252	0.846	0.261	0.826	0.798	0.124	0.868	0.393	0.614	0.472	0.299	0.949	0.797	0.64	0.374	0
CN73 gp08	27589	27885	alfa	NC023760	Mink coronavirus strain WD1127	0.089	0.378	0.046	0.936	0.02	0.621	0.979	0.21	0.716	0.089	0.096	0.763	0.947	0.622	0.419	0.025	0.804	0.34	0.188	0.367	0.871	0.45	0.306	0.681	0.757	0.416	0.013	0.064	0.398	0.641	0.613	0.717	0.409	0.287	0.773	0.727	0.23	0.023	0.203	0.629	0.572	0.517	0.271	0.096
CN73 gp06	25633	26439	alfa	NC023760	Mink coronavirus strain WD1127	0.87	1	0.021	0.003	0.333	0.449	0.693	0.346	0.06	0	0.578	1	0.482	0.512	0.755	0.171	0.025	0	0.562	0.202	0.957	0.786	0.651	0.028	0.216	0.997	0.899	0.676	0.303	0.265	0.339	0.977	0.812	0.019	0.047	0.774	0.927	0.225	0.996	0.066	0.351	0.293	0.512	0.572
CN73 gp05	25368	25616	alfa	NC023760	Mink coronavirus strain WD1127	0.267	0.858	0.964	0.007	0.978	0.494	0.236	0.006	0.079	0.038	0	0.998	0.103	0.311	0.385	0.803	0.004	0.125	0.103	0.018	0.008	0.822	0.265	0.717	0.085	0.697	0.581	0.18	0.482	0.263	0.429	0.075	0.662	0.567	0.668	0.623	0.252	0.564	0.634	0.905	0	0.339	0.756	0.246
CN73 gp03	20322	24638	alfa	NC023760	Mink coronavirus strain WD1127	0.002	1	0	0.012	1	0.024	0.926	0	0.91	0	0	1	0	0.071	1	0.167	0	0.003	0.052	0	1	1	0.702	0.009	1	1	0.059	0.999	0.348	0.231	0.109	0.265	1	0.006	0.953	0.858	0.013	0.18	1	0.383	0.652	0.117	0.119	0.006
CN73 gp09	27870	28091	alfa	NC023760	Mink coronavirus strain WD1127	0.475	0.813	0.504	0.056	0.993	0.003	0.428	0.192	0.062	0	0.464	0.999	0.032	0.964	0.212	0.289	0.092	0.013	0.247	0.245	0.293	1	0.06	0.329	0.8	0.663	0.014	0.99	0.321	0.164	0.815	0.884	0.355	0.024	0.982	0.203	0.226	0.57	0.209	0.181	0.042	0.448	0.08	0.071
orf4	24094	24774	alfa	NC028752	Camel alphACoronavirus isolate camel	0.895	0.534	0.826	0.016	0.589	0.176	0.94	0.172	0.629	0.11	0.021	0.971	0.012	0.895	0.197	0.793	0.131	0.175	0.068	0.491	0.097	0.344	0.458	0.773	0.004	0.951	0.129	0.986	0.071	0.306	0.84	0.345	0.891	0.05	0.522	0.136	0.895	0.439	0.894	0.264	0.233	0.576	0.975	0.116
S	20585	24094	alfa	NC028752	Camel alphACoronavirus isolate camel	0.261	1	0.004	0	1	0.017	1	0	0.663	0	0	1	0	0.683	0.607	0.99	0	0.033	0.001	0	0.99	0.995	0.247	0.061	0.6	1	0.029	0.95	0	0.998	0.753	0.975	0.992	0	0.558	0.386	0.949	0.073	1	0.697	0.951	0.993	0.738	0.148
orf1a	293	12565	alfa	NC028752	Camel alphACoronavirus isolate camel	0.339	1	0	0	1	0	0.998	0	0.184	0	0	1	0	0.077	1	0.985	0	0	0	0	1	1	0.581	0	1	1	0	1	0.003	0.997	0.146	1	1	0	1	0.986	0.006	0	1	0.977	0.992	0.872	0.376	0
orf1ab	293	20583	alfa	NC028752	Camel alphACoronavirus isolate camel	0	1	0	0	1	0	0.957	0	0.839	0	0	1	0	0.319	1	0.482	0	0	0	0	1	1	0.583	0	1	1	0	1	0.001	0.993	0.057	1	1	0	1	0.998	0	0	1	0.993	1	0.319	0.195	0
M	24997	25677	alfa	NC028752	Camel alphACoronavirus isolate camel	0.774	0.88	0.987	0	0.967	0.049	0.451	0.29	0.313	0.272	0.041	0.961	0.004	0.619	0.098	0.995	0.002	0.107	0.09	0.705	0.007	0.895	0.724	0.021	0.039	0.826	0.677	0.456	0.053	0.912	0.35	0.987	0.997	0.001	0.656	0.438	0.913	0.132	0.922	0.159	0.188	0.946	0.213	0.994
E	24752	24985	alfa	NC028752	Camel alphACoronavirus isolate camel	0.369	0.567	0.304	0.329	0.8	0.894	0.721	0.002	0.675	0.062	0.133	0.643	0.031	0.124	0.269	0.971	0.289	0.936	0.018	0	0.408	0.284	0.128	0.366	0.456	0.132	0.301	0.566	0.007	0.826	0.893	0.105634	0.409	0.088	0.772	0.575	0.704	0.256	0.043	0.107	0.858	0	0.033	0.313
N	25691	26839	alfa	NC028752	Camel alphACoronavirus isolate camel	0.065	1	0.081	0.003	0.999	0.003	0.858	0.025	0.926	0	0.104	1	0	0.93	0.803	0.749	0	0.012	0.008	0.396	0.857	1	0.864	0.196	0.513	0.929	0.15	0.998	0.12	0.529	0.158	0.723	0.874	0.311	0.443	0.545	0.632	0.332	0.94	0.921	0.741	0.28	0.808	0.015
AVT88 gp4	24493	24585	alfa	NC028806	Swine enteric coronavirus	0.234	0.991	0.36	0.002	0.562	0.067	0.471	0.231	0.812	0.003	0.037	0.835	0.015	0.463	0.34	0.735	0	0.101	0.178	0.185	0.195	0.895	0.525	0.015	0	0.583	0.027	0.957128	0.388158	0.147	0.64	0.532598	0	0.6	0.434	0.4004	0.602	0.332	0.898	0.473	0.328	0.077	0.191	0.213
AVT88 gp1	307	12354	alfa	NC028806	Swine enteric coronavirus	0	1	0.133	0	1	0	0.99	0.002	0.965	0	0	1	0	0.699	0.999	0.723	0	0	0.166	0.006	0.847	1	0.712	0	0.679	1	0.002	1	0.527	0.966	0.018	0.963	1	0	1	1	0.348	0	1	1	0.994	0.415	0	0
AVT88 gp8	26447	27595	alfa	NC028806	Swine enteric coronavirus	0.156	0.999	0.053	0.089	0.839	0.711	0.55	0.02	0.732	0	0.393	1	0.161	0.541	0.916	0.22	0.026	0.026	0.002	0.512	0.927	0.596	0.562	0.295	0.923	0.542	0.532	0.318	0.473	0.956	0.34	0.841	0.41	0.27	0.43	0.954	0.276	0.155	0.517	0.998	0.997	0.573	0.41	0.288
AVT88 gp7	25646	26434	alfa	NC028806	Swine enteric coronavirus	0.719	0.991	0.35	0.005	0.727	0.001	0.982	0.33	0.191	0.081	0.007	0.999	0.194	0.653	0.512	0.453	0.007	0.009	0.094	0.712	0.51	0.882	0.417	0.095	0.825	0.59	0.278	0.988	0.033	0.95	0.576	0.603	0.554	0.246	0.784	0.905	0.77	0.007	0.497	0.976	0.991	0.34	0.04	0.987
AVT88 gp3	20355	24503	alfa	NC028806	Swine enteric coronavirus	0.006	1	0	0.002	1	0.19	0.996	0	0.958	0	0.136	1	0.007	0.571	0.897	0.699	0	0.02	0.011	0.003	1	1	0.96	0.02	0.608	0.852	0.211	0.822	0.082	0.429	0.036	0.085	0.995	0.246	0.404	0.847	0.534	0.121	0.987	0.952	0.459	0.442	0.449	0
AVT88 gp9	27601	27837	alfa	NC028806	Swine enteric coronavirus	0.258	0.131	0.612	0.6	0.011	0.977	0.555	0.317	0.51	0.05	0.576	0.475	0.915	0.405	0.04	0.243	0.534	0.421	0.384	0.307	0.137	0.004	0.085	0.334	0.297	0.727	0.542	0.685015	0.216	0.361	0.39	0.22	0.183	0.44	0.263	0.612	0.838	0.407	0.565	0.184	0.794177	0.107	0.35	0.659
AVT88 gp6	25387	25635	alfa	NC028806	Swine enteric coronavirus	0.034	0.982	0.684	0.054	0.141	0.7	0.616	0.258	0.755	0.002	0.323	0.895	0.89	0.12	0.084	0.543	0.004	0.125	0.262	0.336	0.143	0.229	0.178	0.138	0.703	0.972	0.969	0.586	0.026	0.199	0.743	0.686	0.059	0.405	0.011	0.751	0.875	0.692	0.895	0.228	0	0.318	0.362	0.957
AVT88 gp5	24666	25400	alfa	NC028806	Swine enteric coronavirus	0.061	0.96	0.16	0.426	0.998	0.094	0.778	0.007	0.934	0.026	0.008	0.898	0	0.686	0.929	0.843	0.106	0.799	0.02	0.039	0.722	0.896	0.993	0.033	0.767	0.35	0.162	0.895	0.792	0.155	0.011	0.339	0.902	0.898	0.979	0.609	0.062	0.147	0.889	0.948	0.096	0.46	0.264	0.143
AVU60 gp6	26041	27330	alfa	NC028811	BtMr AlphACoV SAX2011	0.003	1	0.837	0.001	0.999	0.002	0.923	0.044	0.88	0	0.026	1	0.008	0.999	0.175	0.119	0	0	0.02	0.413	0.108	0.972	0.992	0.059	0.117	0.971	0.096	1	0.047	0.274	0.003	0.708	1	0.1	0.958	0.438	0.693	0.146	0.996	0.955	0.017	0.737	0.635	0.047
AVU60 gp1	299	20286	alfa	NC028811	BtMr AlphACoV SAX2011	0	1	0	0	1	0	0.996	0	1	0	0	1	0	0.218	1	0.467	0	0	0.007	0	1	1	1	0	1	1	0	1	0.133	0.916	0	1	1	0	1	1	0	0	1	1	0.952	0.74	0.015	0
AVU60 gp2	20288	24451	alfa	NC028811	BtMr AlphACoV SAX2011	0	1	0.001	0.097	1	0.078	0.987	0	1	0	0	1	0	0.239	1	0.875	0	0.494	0	0	0.999	0.993	0.86	0.025	0.968	1	0.024	0.992	0.268	0.694	0.102	0.906	1	0.002	0.998	0.311	0.016	0.245	1	0.185	0.546	0.647	0.899	0.048
AVU60 gp4	25109	25339	alfa	NC028811	BtMr AlphACoV SAX2011	0.033	0.968	0.027	0.493	0.852	0.081	0.859	0.104	0.663	0.003	0.176	0.892	0.229	0.671	0.503	0.313	0.12	0.357	0.251	0.089	0.869	0.787	0.391	0.757	0.526	0.213	0.342	0.78	0.053	0.649	0.335	0.025	0.363	0.621	0.527	0.009	0.534	0.936	0.21	0.837	0.386	0.717	0.635	0.241
AVU60 gp3	24448	25107	alfa	NC028811	BtMr AlphACoV SAX2011	0.011	0.994	0.688	0.148	0.928	0.207	1	0	0.884	0.056	0	0.983	0.166	0.244	0.126	0.951	0.002	0.81	0.002	0.019	0.19	0.183	0.016	0.143	0.848	0.777	0.455	0.969	0.036	0.293	0.723	0.728	0.571	0.177	0.248	0.534	0.996	0.073	0.396	0.489	0.155	0.35	0.084	0.145
AVU60 gp5	25349	26032	alfa	NC028811	BtMr AlphACoV SAX2011	0.63	0.939	0.027	0.186	0.294	0.602	0.989	0.009	0.577	0.031	0.058	0.986	0.27	0.314	0.5	0.673	0.301	0.378	0.323	0.003	0.939	0.207	0.11	0.334	0.772	0.883	0.661	0.819	0.04	0.113	0.94	0.16	0.491	0.246	0.054	0.757	0.807	0.396	0.57	0.43	0.568	0.145	0.408	0.884
AVU57 gp7	27111	27359	alfa	NC028814	BtRf AlphACoV HuB2013	0.684	0.241	0	0.762	0.886	0.465	0.846	0.002	0.749	0	0.035	0.981	0.001	0.995	0.821	0.1	0.888	0.373	0.022	0.084	0.943	0.463	0.231	0.981	0.738	0.777	0.169	0.015	0.45	0.821	0.953	0.728	0.525	0.056	0.983	0.039	0.19	0.792	0.619	0.522	0.167	0.824	0.986	0.063
AVU57 gp5	25242	25925	alfa	NC028814	BtRf AlphACoV HuB2013	0.402	1	0.854	0	0.832	0.006	0.821	0.53	0.768	0.04	0	1	0.018	0.449	0.835	0.649	0	0	0.566	0.42	0.083	0.925	0.234	0.247	0.535	0.942	0.151	0.964	0.03	0.832	0.816	0.082	0.998	0.142	0.19	0.904	0.119	0.516	0.801	0.776	0.439	0.892	0.398	0.396
AVU57 gp3	24338	25027	alfa	NC028814	BtRf AlphACoV HuB2013	1	1	0.006	0	0.999	0.056	0.69	0.002	0.016	0	0.265	1	0	0.706	0.908	0.982	0.005	0.007	0.005	0.033	0.975	0.996	0.407	0.594	0.777	0.987	0.124	0.638	0.538	0.8	0.932	0.999	0.719	0	0.75	0.246	0.116	0.776	0.803	0.673	0.853	0.52	0.635	0.027
AVU57 gp2	20226	24338	alfa	NC028814	BtRf AlphACoV HuB2013	0.021	1	0.014	0	1	0	0.42	0.001	0.906	0	0	1	0	0.948	1	0.219	0	0	0.01	0.068	0.98	1	0.002	0.06	0.992	1	0.012	1	0.274	0.544	0.989	0.281	1	0	0.64	0.883	0.039	0.357	0.943	0.191	0.82	0.177	0.225	0
AVU57 gp4	25035	25232	alfa	NC028814	BtRf AlphACoV HuB2013	0.487	0.219	0.688	0.296	0.834	0.191	0.461	0.175	0.13	0.185	0.156	0.88	0.131	0.881	0.209	0.318	0.385	0.242	0.287	0.227	0.104	0.427	0.293	0.641	0.453	0.322	0.781	0.621	0.043	0.344	0.513	0.293	0.426	0.323	0.433	0.323	0.754	0.535	0.183	0.375	0.704	0.108	0.242	0.481
AVU57 gp6	25937	27088	alfa	NC028814	BtRf AlphACoV HuB2013	0.069	1	0.296	0.001	0.933	0.031	0.797	0.2	0.946	0	0.178	1	0.01	0.681	0.537	0.853	0	0.021	0.22	0.353	0.611	0.998	0.986	0.045	0.311	0.872	0.17	0.997	0.149	0.325	0.03	0.958	0.972	0.146	0.599	0.318	0.29	0.617	0.986	0.653	0.073	0.754	0.549	0.011
AVU57 gp1	42	20224	alfa	NC028814	BtRf AlphACoV HuB2013	0.031	1	0	0	1	0	0.005	0	0.998	0	0	1	0	0.991	1	0.046	0	0	0.02	0.001	1	1	0.456	0	0.949	1	0	1	1	0.079	0.781	0.992	1	0	0.899	1	0	0.004	1	0.788	0.317	0.106	0.002	0
AVU56 gp5	24585	25271	alfa	NC028824	BtRf AlphACoV YN2012	0.427	0.607	0.719	0.175	0.948	0.008	0.895	0.218	0.309	0.028	0.036	0.995	0.059	0.999	0.155	0.14	0.172	0.036	0.482	0.164	0.174	0.787	0.103	0.893	0.333	0.677	0.356	0.942	0.368	0	0.869	0.001	0.988	0.26	0.799	0.396	0.117	0.696	0.385	0.427	0.148	0.001	0.797	0.001
AVU56 gp1	135	20284	alfa	NC028824	BtRf AlphACoV YN2012	0	1	0	0.937	1	0.014	0.997	0	1	0	0	1	0	0.915	1	0.018	0	0.285	0	0	1	1	1	0	1	1	0	1	0.292	1	0	1	1	0.311	1	1	0.028	0	1	1	0.995	0.999	0.096	0
AVU56 gp2	20281	23679	alfa	NC028824	BtRf AlphACoV YN2012	0	1	0.008	0.69	1	0.408	0.289	0	0.996	0	0.003	1	0.01	0.045	1	0.417	0	0.627	0.175	0	0.986	0.998	0.993	0	0.994	0.888	0.045	0.868	0.942	0.84	0.001	0.253	0.973	0.97	0.999	0.993	0.001	0.008	1	0.999	0.924	0.64	0.286	0.011
AVU56 gp6	25283	26410	alfa	NC028824	BtRf AlphACoV YN2012	0.002	1	0.488	0.109	0.991	0.448	0.843	0	0.976	0	0.083	0.985	0.01	0.403	0.442	0.951	0.001	0.69	0.01	0.042	0.393	0.525	0.953	0	0.943	0.658	0.409	0.96	0.002	0.663	0.053	0.651	0.94	0.561	0.491	0.791	0.3	0.335	0.97	0.593	0.422	0.725	0.03	0.285
AVU56 gp3	23679	24368	alfa	NC028824	BtRf AlphACoV YN2012	0.001	0.988	0.18	0.506	0.908	0.005	0.926	0.273	0.705	0.016	0.318	0.881	0.376	0.901	0.201	0.173	0.043	0.202	0.553	0.126	0.689	0.969	0.012	0.304	0.994	0.392	0.168	0.895	0.085	0.592	0.839	0.225	0.013	0.789	0.93	0.516	0.164	0.41	0.08	0.874	0.326	0.793	0.01	0.034
AVU56 gp4	24349	24576	alfa	NC028824	BtRf AlphACoV YN2012	0.004	0.937	0.82	0.163	0.759	0.212	0.278	0.253	0.837	0.004	0.004	0.918	0.294	0.479	0.621	0.293	0.004	0.119	0.324	0.281	0.038	0.918	0.458	0.177	0.398	0.879	0.739	0.748	0.295	0.056	0.45	0.764056	0.599	0.391	0.699	0.113	0.233	0.713	0.932	0.377	0.059	0.183	0.724	0.321
AVU58 gp3	24114	24737	alfa	NC028833	BtNv AlphACoV SC2013	0.719	0.905	0.001	0.503	0.944	0.065	0.836	0.041	0.023	0.039	0.627	0.987	0.121	0.886	0.69	0.17	0.675	0.212	0.766	0.001	0.996	0.971	0.58	0.383	0.83	0.199	0.16	0.795	0.2	0.521	0.157	0.302	0.262	0.86	0.792	0.481	0.848	0.044	0.264	0.958	0.2	0.968	0.158	0.079
AVU58 gp1	214	20009	alfa	NC028833	BtNv AlphACoV SC2013	0	1	0	0	1	0.003	0.98	0	1	0	0	1	0	0.48	1	0.848	0	0	0	0	1	1	0.862	0	1	1	0	1	0.753	0.913	0.242	0.76	1	0	1	1	0	0	1	1	0.836	0.865	0.09	0
AVU58 gp6	25691	26986	alfa	NC028833	BtNv AlphACoV SC2013	0.022	1	0.619	0.013	0.981	0.2	0.923	0.004	0.806	0	0.008	1	0.064	0.981	0.488	0.09	0	0.001	0.135	0.011	0.286	0.917	0.997	0.006	0.019	0.987	0.132	0.995	0.429	0.405	0.002	0.512	1	0.378	0.992	0.875	0.421	0	1	0.984	0.362	0.542	0.883	0.021
AVU58 gp5	24996	25682	alfa	NC028833	BtNv AlphACoV SC2013	0.425	0.994	0.296	0.005	0.854	0.029	0.942	0.178	0.38	0.013	0.13	0.992	0.123	0.643	0.295	0.674	0.007	0.052	0.186	0.355	0.573	0.93	0.803	0.373	0.255	0.416	0.644	0.935	0.141	0.282	0.118	0.775	0.49	0.601	0.127	0.174	0.955	0.604	0.759	0.78	0.45	0.226	0.732	0.763
AVU58 gp4	24762	24989	alfa	NC028833	BtNv AlphACoV SC2013	0.019	0.895	0.136	0.416	0.605	0.302	0.957	0.033	0.993	0.002	0.086	0.753	0.05	0.801	0.199	0.692	0.107	0.661	0.114	0.101	0.599	0.707	0.702	0.019	0.425	0.828	0.367	0.686	0.315	0.188	0.476	0.957	0.362	0.171	0.61	0.846	0.73	0.025	0.898	0.465	0.465	0.137	0.401	0.183
AVU58 gp2	20083	24114	alfa	NC028833	BtNv AlphACoV SC2013	0	1	0.009	0	1	0.001	0.997	0	1	0	0	1	0	0.985	1	0.341	0	0	0.053	0	0.984	1	0.965	0	0.894	1	0	1	0.334	0.109	0.217	0.342	1	0.008	1	0.584	0.004	0.266	1	0.522	0.102	0.689	0.298	0
E	25185	25433	alfa	NC030292	Ferret coronavirus isolate FRCoV	0.278	0.39	0.618	0.376	0.909	0.476	0.462	0.018	0.128	0.006	0.377	0.987	0.219	0.968	0.182	0.183	0.306	0.179	0.021	0.129	0.2	0.944	0.069	0.547	0.483	0.789	0.484	0.585	0.12	0.019	0.757	0.064	0.172	0.555	0.378	0.571	0.54	0.227	0.492	0.676	0	0.032	0.531	0.457
S	20136	24452	alfa	NC030292	Ferret coronavirus isolate FRCoV	0.254	1	0	0.001	1	0.12	0.993	0	0.16	0	0	1	0	0.102	1	0.934	0	0.088	0.001	0	1	0.858	0.026	0.093	1	0.981	0.01	0.571	0.249	0.999	0.829	0.054	0.959	0.018	1	0.687	0.002	0.039	0.646	0.992	0.984	0.987	0.021	0.063
N	26262	27389	alfa	NC030292	Ferret coronavirus isolate FRCoV	0.017	1	0.367	0.08	1	0.388	0.014	0	0.622	0	0.424	1	0.002	0.857	0.968	0.319	0.001	0.06	0.001	0.179	0.542	0.997	0.538	0.383	0.696	0.181	0.021	0.783	0.711	0.993	0.085	0.926	0.343	0.571	0.809	0.693	0.745	0.051	0.259	0.999	1	0.579	0.19	0.001
nsp	24473	25216	alfa	NC030292	Ferret coronavirus isolate FRCoV	0.111	0.966	0.049	0.472	1	0.059	0.738	0.005	0.818	0.01	0.054	0.949	0	0.844	0.932	0.663	0.204	0.659	0.02	0.083	0.884	0.958	0.63	0.278	0.709	0.605	0.042	0.92	0.254	0.971	0.332	0.124	0.429	0.802	0.997	0.776	0.475	0.003	0.726	0.991	0.991	0.581	0.521	0.172
M	25448	26245	alfa	NC030292	Ferret coronavirus isolate FRCoV	0.091	0.999	0.855	0.003	0.783	0.046	0.869	0.237	0.131	0.003	0.141	1	0.881	0.491	0.058	0.431	0	0.004	0.557	0.092	0.084	0.886	0.563	0.845	0.393	0.16	0.368	0.87	0.246	0.558	0.108	0.001	0.978	0.582	0.46	0.801	0.719	0.172	0.226	0.992	0.766	0.201	0.445	0.044
orf1ab	276	20143	alfa	NC030292	Ferret coronavirus isolate FRCoV	0	1	0	0	1	0.088	0.915	0	1	0	0	1	0	0.199	1	0.938	0	0.001	0	0	1	1	0.856	0	1	1	0	1	0.551	0.405	0.138	0.758	1	0	0.999	0.994	0	0	1	0.997	0.978	0.007	0.529	0
3x like	27398	27670	alfa	NC030292	Ferret coronavirus isolate FRCoV	0.006	0.925	0.48	0.336	0.918	0.12	0.408	0.234	0.676	0	0.614	0.738	0.343	0.641	0.14	0.466	0.032	0.384	0.707	0.054	0.291	0.966	0.373	0.645	0.647	0.362	0.046	0.988	0.144	0.224	0.231	0.573	0.599	0.54	0.981	0.006	0.516	0.552	0.284	0.581	0.738	0.04	0.395	0.048
orf1ab	276	12152	alfa	NC030292	Ferret coronavirus isolate FRCoV	0.004	1	0	0	1	0.141	0.842	0	0.986	0	0	1	0	0.474	1	0.71	0	0.002	0	0	1	1	0.538	0.002	1	0.994	0	1	0.589	0.179	0.45	0.519	1	0	0.997	0.406	0.003	0.135	0.99	0.98	0.9	0.006	0.111	0
orf7b	27561	28169	alfa	NC030292	Ferret coronavirus isolate FRCoV	0.43	0.996	0.004	0.131	0.496	0.244	0.513	0.528	0.792	0	0.212	0.99	0.128	0.718	0.981	0.048	0.138	0.02	0.592	0.416	0.979	0.907	0.243	0.643	0.897	0.192	0.512	0.323	0.613	0.073	0.857	0.909	0.452	0.099	0.047	0.779	0.611	0.473	0.093	0.472	0.793	0	0.253	0.032
E	25296	25529	alfa	NC032107	NL63 related bat coronavirus	0.821	0.022	0.077	0.798	0.494	0.88	0.115	0.157	0.065	0.416	0.109	0.831	0.295	0.522	0.943	0.105	0.967	0.382	0.218	0.248	0.669	0.072	0.337	0.459	0.105	0.63	0.937	0.591	0.923	0.018	0.657	0.074	0.18	0.8	0.111	0.706	0.149	0.796	0.589	0.19	0.528529	0.01	0.565	0.761
ORFx	27927	28214	alfa	NC032107	NL63 related bat coronavirus	0.588	0.42	0.52	0.196	0.15	0.087	0.73	0.707	0.383	0.003	0.242	0.938	0.515	0.97	0.149	0.04	0.272	0.014	0.047	0.922	0.182	0.822	0.319	0.87	0.6	0.685	0.908	0.496	0.034	0.808	0.757	0.01	0.205	0.504	0.118	0.619	0.795	0.415	0.545	0.976	0.445226	0.738	0.884	0.653
ORF3	24632	25315	alfa	NC032107	NL63 related bat coronavirus	0.273	0.972	0.416	0.059	0.491	0.329	0.341	0.558	0.202	0.262	0.068	0.954	0.733	0.101	0.89	0.24	0.029	0.037	0.408	0.603	0.424	0.839	0.371	0.288	0.184	0.931	0.97	0.006	0.373	0.704	0.26	0.898	0.969	0.026	0.081	0.834	0.171	0.823	0.864	0.395	0.671	0.538	0.831	0.885
orf1ab	242	20517	alfa	NC032107	NL63 related bat coronavirus	0.144	1	0	0	1	0.032	0.176	0	0.283	0	0	1	0	0	1	1	0	0	0	0	1	1	0.445	0	1	1	0	0.999	0.99	0.58	0.178	1	1	0	0.857	1	0	0.016	1	0.932	0.981	0.054	0.218	0
N	26241	27464	alfa	NC032107	NL63 related bat coronavirus	0.973	1	0.01	0	0.998	0.225	0.71	0.003	0.025	0	0.677	1	0	0.784	0.834	0.761	0.026	0	0.075	0.031	0.981	0.875	0.847	0.002	0.926	0.998	0.02	0.993	0.481	0.555	0.116	0.985	0.451	0.04	0.988	0.858	0.222	0.018	0.916	0.865	0.472	0.611	0.037	0.002
orf1ab	242	12502	alfa	NC032107	NL63 related bat coronavirus	0.253	1	0	0	1	0.029	0.255	0	0.218	0	0	1	0	0	1	0.981	0	0	0.022	0	1	1	0.327	0	1	1	0.006	0.956	1	0.26	0.349	1	1	0	0.927	1	0	0.014	1	0.765	0.955	0.011	0.022	0
M	25538	26230	alfa	NC032107	NL63 related bat coronavirus	0.361	0.994	0.474	0.005	0.123	0.053	0.916	0.736	0.766	0.061	0.105	0.884	0.571	0.44	0.197	0.579	0.004	0.033	0.567	0.658	0.407	0.895	0.732	0.116	0.851	0.15	0.921	0.959	0.135	0.186	0.44	0.03	0.927	0.679	0.044	0.942	0.177	0.75	0.377	0.325	0.125	0.397	0.05	0.122
S	20514	24632	alfa	NC032107	NL63 related bat coronavirus	0.36	1	0.129	0	1	0	0.247	0	0.01	0	0.021	1	0	0.866	0.996	0.854	0	0	0.006	0.031	0.838	1	0	0.28	0.883	1	0.005	1	0.469	0.044	0.988	0.127	0.797	0	0.911	0.091	0.358	0.514	0.598	0.544	0.239	0.039	0.349	0
BWV08 gp4	25703	26449	alfa	NC032730	Lucheng Rn rat coronavirus	0.132	1	0.042	0.002	0.102	0.029	0.987	0.679	0.999	0	0.014	0.999	0.103	0.869	0.679	0.171	0	0.001	0.631	0.511	0.9	0.961	0.927	0.115	0.043	0.963	0.713	0.897	0.654	0.162	0.418	0.001	0.994	0.369	0.165	0.991	0.281	0.086	0.996	0.676	0.325	0.193	0.805	0.084
BWV08 gp3	25457	25693	alfa	NC032730	Lucheng Rn rat coronavirus	0.819	0.992	0.082	0.008	0.071	0.591	0.919	0.166	0.528	0.025	0.159	0.833	0.184	0.016	0.429	0.943	0.041	0.27	0.003	0.778	0.731	0.393	0.814	0.03	0.307	0.98	0.206	0.618	0.061	0.986	0.416	0.710769	0.598	0.182	0.369	0.95	0.41	0.247	0.997	0.796	0.934	0.827	0.854	0.892
BWV08 gp1	332	20580	alfa	NC032730	Lucheng Rn rat coronavirus	0	1	0.002	0	0.985	0.029	1	0	1	0	0	1	0.129	0.67	0.851	0.343	0	0	0	0	0.998	1	1	0	0.563	1	0.957	0.023	0.018	0.984	0	1	1	0.015	0.044	1	0.837	0	1	1	0.979	0.771	0.477	0.001
BWV08 gp2	21412	24816	alfa	NC032730	Lucheng Rn rat coronavirus	0	1	0	0.827	0.385	0.985	1	0	1	0	0.01	0.99	0.731	0.007	0.714	0.853	0.003	0.958	0.043	0	0.999	0.029	0.986	0.001	0.96	0.992	0.986	0.34	0.04	0.622	0.059	0.726	0.85	0.781	0.1	0.995	0.425	0.08	1	0.767	0.951	0.145	0.844	0.728
BWV08 gp5	26974	28149	alfa	NC032730	Lucheng Rn rat coronavirus	0.004	0.996	0.602	0.286	0.948	0.009	0.863	0.353	0.999	0	0	1	0.011	0.995	0.905	0.009	0.005	0.006	0.015	0.939	0.31	0.944	0.991	0.127	0.363	0.322	0.324	0.784	0.117	0.285	0.091	0.906	0.994	0.112	0.281	0.898	0.265	0.755	0.965	0.825	0.382	0.22	0.675	0.002
CD915 gp4	23753	24397	alfa	NC034972	Coronavirus ACCoV JC34	0.015	1	0.002	0.252	0.9	0.195	0.944	0.007	0.954	0	0.036	0.989	0.023	0.282	0.968	0.577	0.028	0.397	0.222	0.014	0.996	0.872	0.097	0.261	0.995	0.801	0.597	0.192	0.172	0.232	0.758	0.867	0.5	0.116	0.029	0.962	0.181	0.575	0.536	0.447	0.307	0.272	0.219	0.338
CD915 gp5	24397	24633	alfa	NC034972	Coronavirus ACCoV JC34	0.51	0.708	0.099	0.291	0.714	0.868	0.638	0.012	0.381	0.089	0.388	0.68	0.073	0.088	0.453	0.906	0.355	0.828	0.013	0.164	0.703	0.065	0.587	0.83	0.533	0.916	0.621	0.11	0.072	0.963	0.386	0.0557809	0.47	0.495	0.029	0.892	0.398	0.815	0.937	0.735	0.501002	0.841	0.999	0.761
CD915 gp7	25401	25901	alfa	NC034972	Coronavirus ACCoV JC34	0.362	0.99	0.011	0.103	0.944	0.188	0.501	0.112	0.697	0	0.121	0.995	0.01	0.799	0.959	0.194	0.102	0.063	0.287	0.132	0.951	0.899	0.909	0.279	0.904	0.705	0.074	0.936	0.551	0.911	0.13	0.43	0.599	0.279	0.952	0.209	0.454	0.264	0.916	0.944	0.905	0.599	0.646	0.814
CD915 gp9	27074	27391	alfa	NC034972	Coronavirus ACCoV JC34	0.91	0.998	0.142	0	0.606	0.57	0.486	0.114	0.428	0	0.144	1	0.011	0.423	0.804	0.706	0.016	0.008	0.651	0.031	0.672	0.628	0.946	0.661	0.016	0.125	0.173	0.048	0.106	0.864	0.283	0.174	0.932	0.047	0.891	0.336	0.141	0.51	0.51	0.63	0.477	0.945	0.718	0.285
CD915 gp8	25903	27072	alfa	NC034972	Coronavirus ACCoV JC34	0.057	1	0.19	0.016	0.944	0	0.998	0.328	0.987	0	0.001	1	0	1	0.398	0.091	0.001	0.002	0.654	0.156	0.742	0.987	0.852	0.158	0.667	0.863	0.217	0.942	0.004	0.648	0.489	0.875	0.977	0.02	0.114	0.922	0.9	0.106	0.904	0.972	0.317	0.887	0.569	0.026
CD915 gp1	437	12361	alfa	NC034972	Coronavirus ACCoV JC34	0	1	0	0.108	1	0.924	0.997	0	1	0	0	1	0	0.971	1	0.014	0	0.002	0	0	1	0.999	0.997	0	1	1	0.873	0.517	0.103	0.537	0.046	1	1	0	0	1	0.101	0.001	1	0.733	0.767	0.329	0.77	0.026
CD915 gp6	24643	25389	alfa	NC034972	Coronavirus ACCoV JC34	0.018	1	0.08	0	0.702	0.159	0.715	0.306	0.99	0	0.109	1	0.06	0.774	0.849	0.239	0	0	0.645	0.116	0.844	0.996	0.571	0.546	0.418	0.808	0.214	0.34	0.853	0.282	0.49	0.008	0.618	0.537	0.454	0.99	0.059	0.07	0.823	1	0.296	0.51	0.814	0.007
CD915 gp3	20376	23756	alfa	NC034972	Coronavirus ACCoV JC34	0	1	0	0.188	0.98	0.73	0.93	0	1	0	0.187	1	0.028	0.118	1	0.372	0	0.164	0.253	0	1	0.957	0.961	0	1	1	0.792	0.666	0.633	0.268	0.124	0.999	0.119	0.324	0.144	0.995	0.17	0.133	1	0.861	0.602	0.146	0.495	0.188
CGV08 gp4	23546	24235	alfa	NC035191	Coronavirus ACCoV JC34	0.994	0.993	0.896	0	0.013	0.877	0.839	0.449	0	0.001	0.027	1	0.961	0.13	0.123	0.435	0	0	0.309	0.541	0.059	0.325	0.119	0.344	0.027	0.965	0.99	0	0.534	0.358	0.977	0.736	0.886	0.003	0.019	0.963	0.814	0.397	0.837	0.455	0.79	0.072	0.472	0.449
CGV08 gp2	19208	22612	alfa	NC035191	Coronavirus ACCoV JC34	0.907	1	0.09	0	0.817	0.988	0.635	0	0.076	0.01	0.004	1	0.162	0	0.999	0.973	0	0.01	0.232	0	0.894	0.035	0	0.011	0.818	1	0.863	0.002	0.895	0.983	1	0.715	0.952	0	0.055	0.991	0.008	0.352	0.982	0.005	0.983	0.758	0.196	0.846
CGV08 gp1	228	19201	alfa	NC035191	Coronavirus ACCoV JC34	0.778	1	0.272	0	0.825	1	0.359	0	0.992	0	0	1	0	0.071	1	0.058	0	0	0.028	0	0.711	0.928	0	0.003	0.678	1	1	0	0.968	0.898	1	1	1	0	0	1	0	0.935	1	0	0.976	0.364	0.437	0.477
CGV08 gp5	24239	25339	alfa	NC035191	Coronavirus ACCoV JC34	0.895	0.735	0.843	0.001	0.024	0.898	0.988	0.063	0.531	0	0.046	1	0.452	0.973	0.023	0.246	0.056	0	0.001	0.879	0.098	0.39	0.806	0.705	0.056	0.833	0.865	0.584	0.205	0.73	0.542	0.997	0.358	0.008	0.197	0.444	0.985	0.483	0.822	0.626	0.989	0.087	0.882	0.856
CGV08 gp3	23306	23533	alfa	NC035191	Coronavirus ACCoV JC34	0.857	0.228	0.112	0.358	0.919	0.607	0.2	0.019	0.67	0.02	0.008	0.972	0	0.879	0.994	0.156	0.761	0.146	0.039	0.092	0.693	0.877	0.741	0.135	0.037	0.706	0.213	0.596	0.486	0.424	0.631	0.831	0.455	0.217	0.366	0.615	0.601	0.141	0.888	0.243	0.078	0.632159	0.755	0.846
nsp 7	28071	28307	alfa	NC038861	Transmissible gastroenteritis virus	0.277	0.422	0.449	0.439	0.203	0.15	0.347	0.785	0.655	0.007	0.486	0.705	0.446	0.963	0.204	0.031	0.357	0.062	0.97	0.123	0.288	0.781	0.054	0.307	0.306	0.356	0.035	0.904	0.74	0.422	0.465	0.301	0.288	0.337	0.499	0.264	0.42	0.503	0.177	0.426	0.667335	0.318	0.084	0.031
nsp 3a	24827	25042	alfa	NC038861	Transmissible gastroenteritis virus	0.009	0.978	0.185	0.257	0.952	0.239	0.093	0.169	0.569	0.004	0.07	0.924	0.183	0.324	0.936	0.211	0.015	0.13	0.468	0.083	0.478	0.852	0.146	0.656	0.655	0.285	0.314	0	0.828	0.944	0.15	0.53954	0.185	0.689	0.984	0.603	0.036	0.051	0.214	0.981	0.824	0.86	0.397	0.303
m	26116	26904	alfa	NC038861	Transmissible gastroenteritis virus	0.761	0.971	0.525	0.004	0.719	0.001	0.921	0.515	0.162	0.102	0.009	1	0.236	0.822	0.529	0.238	0.017	0	0.056	0.909	0.353	0.882	0.565	0.094	0.56	0.753	0.33	0.994	0.091	0.86	0.482	0.828	0.663	0.117	0.691	0.85	0.801	0.023	0.775	0.963	0.974	0.466	0.199	0.918
D1S95 gp1	315	20368	alfa	NC038861	Transmissible gastroenteritis virus	0.322	1	0.103	0	1	0	0.999	0	0.107	0	0	1	0	0.998	0.996	0.505	0	0	0.001	0	0.897	1	0.666	0	0.988	1	0	1	0.004	0.754	0.069	0.999	1	0	1	0.22	0.001	0.098	1	1	0.829	0.473	0	0
D1S95 gp2	315	12368	alfa	NC038861	Transmissible gastroenteritis virus	0	1	0.193	0	1	0	0.992	0.004	0.98	0	0	1	0	0.976	0.989	0.467	0	0	0.271	0.008	0.778	1	0.671	0	0.914	1	0.001	1	0.393	0.748	0.006	1	1	0	1	0.999	0.236	0	0.999	1	0.941	0.314	0	0
n	26917	28065	alfa	NC038861	Transmissible gastroenteritis virus	0.033	1	0.525	0	0.899	0.337	0.232	0.25	0.708	0	0.118	1	0.317	0.774	0.865	0.042	0	0	0.03	0.81	0.369	0.994	0.207	0.431	0.926	0.888	0.439	0.545	0.645	0.74	0.445	0.755	0.693	0.085	0.823	0.805	0.034	0.645	0.449	0.988	0.967	0.323	0.43	0.018
s	20365	24708	alfa	NC038861	Transmissible gastroenteritis virus	0.007	1	0	0.031	1	0.069	0.841	0	0.701	0	0.021	1	0.001	0.135	1	0.437	0	0.028	0.044	0	1	0.993	0.21	0.334	1	0.977	0.009	0.963	0.074	0.726	0.363	0.868	0.842	0.002	0.898	0.289	0.015	0.673	0.929	0.745	0.944	0.278	0.27	0.005
e	25857	26105	alfa	NC038861	Transmissible gastroenteritis virus	0.05	0.937	0.866	0.038	0.31	0.64	0.564	0.177	0.842	0.028	0.139	0.775	0.582	0.092	0.091	0.822	0.003	0.302	0.057	0.616	0.046	0.252	0.473	0.381	0.157	0.948	0.778	0.495	0.114	0.446	0.496	0.554	0.219	0.395	0.08	0.69	0.872	0.474	0.955	0.44	0	0.601	0.711	0.856
HGI19 gp4	24857	25546	alfa	NC046955	Shrew coronavirus isolate Shrew	0.187	0.999	0.349	0.005	0.845	0.925	0.07	0.049	0.539	0.001	0.128	0.999	0.228	0.02	0.985	0.663	0.001	0.031	0.365	0.033	0.513	0.753	0.024	0.466	0.079	0.987	0.508	0.705	0.853	0.017	0.922	0.397	0.731	0.03	0.078	0.581	0.278	0.684	0.834	0.136	0.158	0.057	0.584	0.014
HGI19 gp2	19485	23150	alfa	NC046955	Shrew coronavirus isolate Shrew	0.41	1	0	0	1	0.997	0.259	0	0.468	0	0.128	1	0	0	1	1	0	0.054	0	0	1	0.948	0.094	0	0.999	1	0.143	0.139	0.575	1	0.863	0.88	0.29	0	0.341	0.899	0.205	0.001	1	0.607	1	0.544	0.049	0.359
HGI19 gp1	340	19484	alfa	NC046955	Shrew coronavirus isolate Shrew	0.337	1	0	0	1	1	0	0	0.999	0	0	1	0	0	1	1	0	0.001	0	0	1	1	1	0	1	1	0	0.791	0.998	1	0.037	1	0.951	0	0.987	1	0	0	1	0.941	1	0.996	0.054	0.021
HGI19 gp5	25565	26770	alfa	NC046955	Shrew coronavirus isolate Shrew	0.388	1	0.142	0.001	0.898	0.789	0.987	0	0.705	0	0.004	1	0.017	0.082	0.855	0.974	0	0.136	0.006	0	0.798	0.424	0.5	0.323	0.189	0.978	0.056	0.247	0.511	0.989	0.609	0.699	0.856	0.06	0.809	0.347	0.532	0.077	0.83	0.912	0.926	0.94	0.873	0.053
HGI19 gp3	24614	24850	alfa	NC046955	Shrew coronavirus isolate Shrew	0.423	0.304	0.1	0.695	0.995	0.453	0.358	0.004	0.134	0.249	0.756	0.474	0.014	0.622	0.366	0.836	0.701	0.94	0.007	0.087	0.682	0.435	0.605	0.034	0.604	0.979	0.746	0.732	0.141	0.073	0.237	0.742743	0.405	0.071	0.246	0.206	0.54	0.927	0.993	0.027	0.122	0.131	0.824	0.984
E	25103	25330	alfa	NC046964	AlphACoronavirus Bat CoV Pkuhlii	0.206	0.263	0.968	0.172	0.944	0.487	0.076	0.14	0.718	0.019	0.098	0.864	0.007	0.929	0.497	0.482	0.11	0.276	0.333	0.125	0.005	0.647	0.557	0.561	0.106	0.497	0.923	0.524	0.576	0.001	0.429	0.864	0.234	0.391	0.717	0.032	0.094	0.971	0.591	0.118	0.016	0.076	0.661	0.609
ORF1ab	281	20175	alfa	NC046964	AlphACoronavirus Bat CoV Pkuhlii	0	1	0	0	1	0	0.543	0	0.996	0	0	1	0	0.806	1	0.599	0	0	0	0	1	1	0.448	0	1	1	0	1	0.999	0.892	0.205	0.999	1	0	1	1	0	0	1	1	0.619	0.957	0.002	0
M	25343	26050	alfa	NC046964	AlphACoronavirus Bat CoV Pkuhlii	0.029	1	0.389	0.004	0.896	0.003	0.987	0.174	0.964	0.001	0.008	0.992	0.051	0.673	0.315	0.777	0	0.058	0.163	0.403	0.46	0.996	0.964	0.454	0.069	0.609	0.366	0.801	0.182	0.651	0.116	0.582	0.963	0.464	0.332	0.329	0.844	0.44	0.956	0.894	0.072	0.905	0.937	0.639
ORF3	24371	25024	alfa	NC046964	AlphACoronavirus Bat CoV Pkuhlii	0.739	0.994	0.002	0.043	0.998	0.469	0.52	0.002	0.202	0.001	0.523	0.997	0	0.346	0.889	0.898	0.112	0.462	0.157	0.004	0.993	0.856	0.111	0.359	0.871	0.139	0.223	0.132	0.937	0.65	0.914	0.765	0.274	0.151	0.964	0.799	0.015	0.213	0.021	0.633	0.316	0.892	0.021	0.137
S	20172	24371	alfa	NC046964	AlphACoronavirus Bat CoV Pkuhlii	0.068	1	0.026	0	1	0.093	0.697	0	0.973	0	0.001	1	0	0.824	1	0.737	0	0	0.005	0.001	0.965	1	0.891	0.019	0.694	1	0.008	0.972	0.982	0.134	0.285	0.987	0.963	0.004	0.856	0.545	0.032	0.423	1	0.946	0.083	0.376	0.548	0
N	26058	27356	alfa	NC046964	AlphACoronavirus Bat CoV Pkuhlii	0.028	1	0.405	0	1	0	0.976	0.01	0.558	0	0.003	1	0.004	0.991	0.591	0.296	0	0	0.2	0.008	0.51	1	0.725	0.11	0.305	0.943	0.173	1	0.389	0.062	0.041	0.514	0.873	0.39	0.993	0.291	0.431	0.172	0.859	0.93	0.005	0.783	0.417	0.084
HO263 gp3	23290	23517	alfa	NC048211	Wencheng Sm shrew coronavirus	0.923	0.059	0.108	0.446	0.865	0.584	0.309	0.014	0.448	0.025	0.005	0.987	0.001	0.931	0.988	0.077	0.873	0.117	0.039	0.076	0.689	0.833	0.697	0.416	0.031	0.637	0.184	0.61	0.463	0.166	0.502	0.772	0.459	0.299	0.472	0.561	0.566	0.19	0.823	0.344	0.034	0.63961	0.82	0.851
HO263 gp2	19192	22596	alfa	NC048211	Wencheng Sm shrew coronavirus	0.889	1	0.027	0.001	0.91	0.984	0.515	0	0.085	0.004	0.007	1	0.057	0	1	0.953	0.004	0.013	0.445	0	0.963	0.084	0.004	0.011	0.884	1	0.647	0.001	0.969	0.994	0.999	0.761	0.928	0	0.108	0.985	0.009	0.477	0.978	0.012	0.918	0.995	0.194	0.624
HO263 gp1	212	19185	alfa	NC048211	Wencheng Sm shrew coronavirus	0.756	1	0.268	0	0.841	1	0.43	0	0.994	0	0	1	0	0.146	1	0.034	0	0	0.047	0	0.708	0.926	0	0.001	0.673	1	1	0	0.924	0.85	1	1	1	0	0	1	0	0.959	1	0	0.924	0.487	0.579	0.702
HO263 gp5	24223	25323	alfa	NC048211	Wencheng Sm shrew coronavirus	0.854	0.867	0.866	0	0.064	0.684	0.969	0.142	0.558	0	0.045	1	0.336	0.984	0.027	0.308	0.016	0	0.002	0.942	0.081	0.437	0.797	0.758	0.058	0.672	0.793	0.697	0.207	0.607	0.511	0.996	0.309	0.012	0.235	0.414	0.983	0.456	0.694	0.705	0.96	0.14	0.77	0.759
HO263 gp4	23530	24219	alfa	NC048211	Wencheng Sm shrew coronavirus	0.999	0.99	0.859	0	0.012	0.915	0.726	0.51	0	0.003	0.041	1	0.963	0.13	0.216	0.364	0	0	0.348	0.58	0.079	0.321	0.106	0.201	0.011	0.991	0.991	0	0.661	0.257	0.979	0.818	0.912	0	0.015	0.977	0.75	0.456	0.928	0.276	0.712	0.062	0.492	0.451
orf1ab	246	12587	alfa	NC048216	NL63 related bat coronavirus	0.039	1	0	0	1	0.004	0.207	0	0.272	0	0	1	0	0.675	1	0.672	0	0	0.001	0	1	1	0.558	0	1	1	0	0.992	1	0.078	0.05	1	1	0.001	1	0.94	0	0	1	1	0.13	0.441	0.68	0
ORF3	24711	25394	alfa	NC048216	NL63 related bat coronavirus	0.943	0.953	0.003	0.117	0.935	0.414	0.818	0.009	0.036	0.017	0.127	1	0.026	0.576	0.98	0.25	0.579	0.07	0.359	0.007	0.989	0.653	0.012	0.549	0.626	0.893	0.204	0.012	0.076	0.974	0.991	0.891	0.823	0	0.396	0.269	0.513	0.397	0.261	0.408	0.731	0.982	0.302	0.504
S	20590	24711	alfa	NC048216	NL63 related bat coronavirus	0.715	1	0	0	1	0.515	0.187	0	0.494	0	0.075	1	0	0.064	1	0.948	0	0.008	0.044	0.001	1	1	0.351	0.008	1	1	0.063	0.334	0.959	0.928	0.763	0.741	0.276	0.081	0.747	0.98	0.017	0.023	1	0.987	0.928	0.773	0.585	0.017
N	26312	27613	alfa	NC048216	NL63 related bat coronavirus	0.805	1	0.489	0	0.354	0.107	0.983	0.276	0.591	0	0	1	0.129	0.652	0.456	0.615	0	0	0.909	0.017	0.422	0.965	0.964	0.185	0.056	0.953	0.366	0.149	0.54	0.494	0.161	0.952	0.925	0.036	0.434	0.686	0.676	0.218	0.777	0.999	0.445	0.704	0.632	0.033
E	25375	25608	alfa	NC048216	NL63 related bat coronavirus	0.715	0.929	0.102	0.023	0.842	0.781	0.087	0.073	0.168	0.035	0.06	0.975	0.039	0.051	0.966	0.71	0.082	0.23	0.021	0.512	0.632	0.267	0.767	0.249	0.002	0.853	0.711	0.255	0.73	0.393	0.171	0.826	0.709	0.225	0.807	0.816	0.511	0.061	0.923	0.387	0.162	0.419	0.915	0.907
ORFx	28196	28486	alfa	NC048216	NL63 related bat coronavirus	0.27	0.9	0.24	0.151	0.007	0.219	0.199	0.985	0.939	0	0.201	0.91	0.55	0.974	0.842	0	0.095	0	0.657	0.961	0.483	0.956	0.932	0.185	0.291	0.074	0.734	0.934	0.541	0.291	0.442	0.952	0.36	0.502	0.565	0.529	0.068	0.344	0.469	0.978	0.696	0.169	0.199	0.103
M	25620	26300	alfa	NC048216	NL63 related bat coronavirus	0.555	0.997	0.173	0.007	0.804	0.054	0.681	0.464	0.127	0.017	0.1	0.999	0.286	0.646	0.848	0.152	0.018	0.002	0.531	0.36	0.725	0.855	0.302	0.493	0.516	0.215	0.973	0.726	0.05	0.094	0.417	0.201	0.914	0.299	0.087	0.524	0.354	0.74	0.124	0.683	0.386	0.097	0.205	0.148
orf1ab	246	20593	alfa	NC048216	NL63 related bat coronavirus	0.005	1	0	0	1	0.005	0.109	0	0.771	0	0	1	0	0.455	1	0.751	0	0	0	0	1	1	0.908	0	1	1	0	1	1	0.087	0.021	1	1	0	1	0.999	0	0	1	1	0.158	0.242	0.776	0
MGp05	23940	28070	beta	AC000192	Murine hepatitis virus	0.004	1	0.002	0.853	0.208	0.971	1	0	0.833	0.001	0.05	0.995	0.988	0.006	0.668	0.488	0.16	0.819	0.007	0.002	0.998	0.008	0.905	0.519	0.946	0.341	0.995	0.677	0.023	0.032	0.037	0.016	0.874	0.969	0.032	0.737	0.838	0.519	0.797	0.822	0.688	0.004	0.711	0.577
MGp03	21770	22567	beta	AC000192	Murine hepatitis virus	0.923	0.417	0.031	0.407	0.272	0.986	0.786	0.004	0.254	0.001	0.344	1	0.254	0.623	0.738	0.231	0.871	0.238	0.004	0.106	0.945	0.223	0.671	0.958	0.419	0.78	0.193	0.009	0.907	0.949	0.713	0.001	0.95	0.182	0.781	0.995	0.031	0.055	0.775	0.982	0.938	0.747	0.988	0.04
MGp11	30120	30530	beta	AC000192	Murine hepatitis virus	0.664	0.295	0.175	0.614	0.177	0.744	0.869	0.062	0.578	0.419	0.176	0.569	0.3	0.242	0.469	0.688	0.776	0.777	0.187	0.096	0.706	0.174	0.1	0.838	0.9	0.328	0.032	0.205	0.009	0.888	0.94	0.5	0.569	0.01	0.702	0.273	0.758	0.274	0.118	0.627	0.45	0.929	0.317	0.031
orf1ab	215	13639	beta	AC000192	Murine hepatitis virus	0	1	0	0.446	0.002	1	1	0	1	0	0	1	0.947	0.989	0.973	0	0.009	0	0	0	1	0.082	0.989	0	0.661	1	0.896	0.44	0.001	0.626	0.192	0.917	1	0	0.175	1	0.42	0.012	1	0.741	0.755	0.483	1	0.152
MGp09	29142	29828	beta	AC000192	Murine hepatitis virus	0.322	0.201	0.11	0.931	0.827	0.969	0.81	0	0.706	0.08	0.01	0.965	0.079	0.453	0.901	0.405	0.885	0.86	0	0.071	0.778	0.361	0.724	0.239	0.457	0.672	0.049	0.382	0.074	0.624	0.336	0.885	0.892	0.074	0.391	0.667	0.359	0.458	0.831	0.259	0.328	0.634	0.676	0.409
MGp04	22613	23932	beta	AC000192	Murine hepatitis virus	0.032	0.984	0.028	0.629	0.085	0.99	0.925	0.004	0.854	0	0.67	0.997	0.925	0.315	0.341	0.223	0.201	0.347	0.002	0.235	0.954	0.025	0.915	0.29	0.845	0.12	0.894	0.33	0.095	0.535	0.107	0.021	0.799	0.703	0.09	0.915	0.358	0.713	0.44	0.721	0.895	0.207	0.221	0.312
MGp06	28162	28581	beta	AC000192	Murine hepatitis virus	0.012	0.964	0.064	0.725	0.211	0.209	0.99	0.126	0.977	0.151	0.013	0.588	0.617	0.221	0.681	0.33	0.184	0.61	0.594	0.019	0.871	0.427	0.777	0.08	0.843	0.608	0.526	0.672	0.115	0.497	0.187	0.511	0.912	0.179	0.528	0.52	0.609	0.199	0.808	0.338	0.803	0.165	0.078	0.606
MGp10	29843	31210	beta	AC000192	Murine hepatitis virus	0.118	0.917	0.762	0.128	0	0.995	1	0	1	0	0	1	0.761	0.916	0.031	0.22	0.036	0.058	0.004	0.066	0.181	0.136	1	0.257	0.002	0.064	0.818	0.211	0.418	0.398	0.074	1	0.516	0.245	0.017	0.817	0.979	0.429	0.983	0.843	0.098	0.696	0.944	0.26
orf1ab	215	21756	beta	AC000192	Murine hepatitis virus	0	1	0	0.174	0.001	1	1	0	1	0	0	1	0.992	0.901	0.977	0	0	0	0.001	0	0.999	0.026	1	0	0.398	1	0.998	0.336	0	0.388	0.001	0.858	1	0.001	0.023	1	0.81	0.01	1	0.925	0.831	0.154	0.998	0.346
MGp08	28879	29145	beta	AC000192	Murine hepatitis virus	0.315	0.273	0.27	0.673	0.026	0.984	0.392	0.216	0.799	0.117	0.23	0.478	0.691	0.15	0.651	0.268	0.632	0.497	0.621	0.057	0.485	0.085	0.212	0.126	0.599	0.834	0.956	0.341	0.604	0.116	0.863	0.492	0.354	0.09	0.129	0.927	0.175	0.474	0.692	0.022	0.252	0.353	0.419	0.926
MGp07	28563	28886	beta	AC000192	Murine hepatitis virus	0.243	0.356	0.652	0.442	0.253	0.718	0.922	0.026	0.9	0.335	0.098	0.257	0.135	0.262	0.062	0.977	0.301	0.96	0.064	0.096	0.175	0.038	0.569	0.79	0.012	0.433	0.505	0.831	0.349	0.055	0.578	0.021	0.901	0.664	0.425	0.62	0.669	0.335	0.536	0.133	0.007	0.595	0.836	0.327
non structural polyprotein 1ab	265	21542	beta	MG772933	Bat SARS like coronavirus	0	1	0.002	0	1	0	0.307	0	1	0	0	1	0	1	1	0.206	0	0	0	0	0.998	1	1	0	0.947	1	0.009	1	0.948	0.002	0	0.998	1	0	0.102	0.995	0.004	0.62	1	0.534	0.53	0	0.424	0
hypothetical protein	28639	28851	beta	MG772933	Bat SARS like coronavirus	0.576	0.954	0.231	0.003	0.088	0	0.646	0.998	0.737	0.107	0.914	0.057	0.181	0.947	0	0.601	0.064	0.041	0.387	0.999	0.497	0.896	0.411	0.123	0.133	0.897	0.444	0.993	0.194	0.925	0.857	0.232	0.405	0.062	0.688	0.032	0.984	0.226	0.887	0.461	0.087	0.968	0.773	0.81
envelope protein	26150	26377	beta	MG772933	Bat SARS like coronavirus	0.3	0.381	0.557	0.424	0.811	0.008	0.587	0.513	0.588	0.649	0.203	0.228	0.063	0.784	0.272	0.54	0.34	0.542	0.396	0.515	0.232	0.793	0.108	0.538	0.137	0.816	0.057	0.904	0.073	0.919	0.835	0.183	0.697	0.189	0.547	0.389	0.509	0.345	0.621	0.578	0.301	0.975	0.759	0.627
membrane protein	26428	27096	beta	MG772933	Bat SARS like coronavirus	0.483	1	0.247	0.001	0.963	0.176	0.943	0.007	0.94	0	0.006	1	0	0.694	0.658	0.978	0.003	0.161	0.003	0.322	0.618	0.703	0.498	0.532	0.361	0.087	0.009	0.233	0.944	0.919	0.779	0.471	0.573	0.235	1	0.555	0.124	0.106	0.163	0.972	0.69	0.842	0.174	0.11
hypothetical protein	28189	28482	beta	MG772933	Bat SARS like coronavirus	0.71	0.814	0.018	0.304	0.807	0.227	0.698	0.094	0.105	0.104	0.97	0.715	0.121	0.726	0.129	0.745	0.593	0.537	0	0.983	0.961	0.369	0.717	0.281	0.888	0.778	0.32	0.508	0.346	0.782	0.106	0.993	0.793	0	0.723	0.082	0.181	0.832	0.892	0.075	0.96	0.691	0.845	0.63
hypothetical protein	27299	27664	beta	MG772933	Bat SARS like coronavirus	0.452	0.819	0.313	0.138	0.997	0.046	0.745	0.038	0.265	0.024	0.123	0.982	0.01	0.89	0.417	0.622	0.157	0.299	0.009	0.329	0.45	0.746	0.457	0.396	0.55	0.978	0.179	0.847	0.031	0.744	0.445	0.71	0.774	0.077	0.861	0.357	0.595	0.387	0.942	0.628	0.854	0.585	0.905	0.418
hypothetical protein	25298	26125	beta	MG772933	Bat SARS like coronavirus	0.993	0.997	0.481	0	0.828	0.019	0.684	0.526	0.102	0.003	0	1	0.006	0.74	0.922	0.475	0.001	0	0.007	0.971	0.377	0.996	0.89	0.092	0.282	0.991	0.346	0.907	0.225	0.74	0.382	0.125	0.975	0.193	0.326	0.788	0.459	0.295	0.995	0.984	0.536	0.459	0.817	0.235
hypothetical protein	27107	27292	beta	MG772933	Bat SARS like coronavirus	0.024	0.748	0.543	0.529	0.073	0.044	0.534	0.894	0.91	0.117	0.226	0.08	0.764	0.549	0.059	0.138	0.065	0.256	0.524	0.89	0.158	0.786	0.869	0.364	0.624	0.414	0.246	0.386	0.205	0.567	0.178	0.730464	0.037	0.914	0.085	0.462	0.533	0.6	0.757	0.957	0.692	0.229	0.676	0.264
nucleocapsid protein	28179	29438	beta	MG772933	Bat SARS like coronavirus	0.318	1	0.627	0	0.947	0.005	0.964	0.153	0.131	0	0.125	1	0.275	0.979	0.042	0.321	0	0	0.128	0.405	0.29	0.964	0.551	0.489	0.249	0.84	0.251	0.998	0.004	0.428	0.169	0.878	0.844	0.039	0.994	0.093	0.518	0.158	0.331	0.98	0.029	0.874	0.431	0.03
hypothetical protein	27799	28164	beta	MG772933	Bat SARS like coronavirus	0.032	0.994	0.486	0.096	0.877	0.132	0.03	0.689	0.959	0	0.303	0.764	0.013	0.79	0.888	0.347	0.003	0.071	0.073	0.97	0.302	0.994	0.895	0.1	0.136	0.07	0.257	0.781	0.868	0.359	0.082	0.668	0.6	0.701	0.558	0.774	0.599	0.14	0.357	0.856	0.667	0.211	0.061	0.018
spike protein	21549	25289	beta	MG772933	Bat SARS like coronavirus	0	1	0.555	0	1	0	0.606	0.042	0.914	0	0.026	1	0	0.952	0.835	0.667	0	0	0.039	0.318	0.395	1	0.933	0.068	0.396	0.99	0.563	1	0.128	0.077	0.009	0.158	0.941	0.303	0.084	0.209	0.884	0.796	0.999	0.93	0.098	0.232	0.474	0.014
S	21545	25354	beta	MN996532	Bat coronavirus RaTG13	0.013	1	0.159	0	1	0.007	0.617	0.006	0.979	0	0.08	1	0	0.731	0.925	0.943	0	0	0.06	0.07	0.8	1	0.93	0.02	0.877	0.99	0.396	1	0.283	0.017	0.032	0.775	0.689	0.159	0.377	0.93	0.439	0.117	0.997	0.927	0.278	0.012	0.094	0.009
E	26215	26442	beta	MN996532	Bat coronavirus RaTG13	0.319	0.308	0.5	0.487	0.722	0.005	0.544	0.699	0.67	0.738	0.21	0.127	0.067	0.858	0.348	0.38	0.442	0.477	0.361	0.75	0.273	0.836	0.104	0.514	0.151	0.81	0.06	0.929	0.096	0.827	0.866	0.285	0.712	0.113	0.438	0.298	0.404	0.589	0.608	0.459	0.318	0.877	0.743	0.549
NS6	27169	27354	beta	MN996532	Bat coronavirus RaTG13	0.024	0.743	0.647	0.528	0.736	0.404	0.225	0.159	0.87	0.08	0.28	0.154	0.227	0.285	0.121	0.74	0.06	0.802	0.018	0.752	0.101	0.397	0.799	0.354	0.679	0.243	0.009	0.72	0.151	0.82	0.131	0.7	0.033	0.916	0.318	0.355	0.322	0.756	0.593	0.793	0.827	0.511	0.511	0.315
N	28240	29499	beta	MN996532	Bat coronavirus RaTG13	0.62	1	0.872	0	0.752	0	0.971	0.626	0.227	0	0.066	1	0.212	0.991	0.003	0.5	0	0	0.072	0.962	0.085	0.961	0.227	0.71	0.219	0.936	0.342	0.952	0.039	0.611	0.761	0.476	0.638	0.024	0.77	0.326	0.906	0.113	0.075	0.972	0.456	0.684	0.305	0.112
NS7a	27360	27725	beta	MN996532	Bat coronavirus RaTG13	0.561	0.991	0.308	0.002	0.98	0.004	0.611	0.346	0.529	0.015	0.14	0.97	0	0.769	0.514	0.852	0.01	0.083	0.327	0.382	0.444	0.983	0.529	0.27	0.404	0.762	0.503	0.968	0.053	0.539	0.566	0.807	0.777	0.023	0.315	0.366	0.754	0.624	0.599	0.478	0.427	0.557	0.253	0.442
NS3	25363	26190	beta	MN996532	Bat coronavirus RaTG13	0.949	0.858	0.796	0.001	0.959	0.047	0.832	0.064	0.236	0.006	0.001	1	0	0.965	0.473	0.615	0.047	0.006	0.001	0.842	0.118	0.98	0.795	0.037	0.53	0.972	0.11	0.999	0.196	0.448	0.479	0.353	0.828	0.184	0.637	0.665	0.449	0.294	0.974	0.786	0.526	0.208	0.539	0.208
NS7b	27722	27853	beta	MN996532	Bat coronavirus RaTG13	0.652	0.325	0	0.353	0.593	0.31	0.78	0.082	0.06	0.073	0	0.963	0.233	0.745	0.382	0.201	0.604	0.216	0.42	0.046	0.652	0.537	0.242	0.042	0	0.755	0.393	0.173252	0.374	0.259	0.702	0.439051	0	0.111	0.144	0.989	0.514	0.009	0.63	0.509	0.525941	0.111	0.167	0.319
NS8	27860	28225	beta	MN996532	Bat coronavirus RaTG13	0.171	0.978	0.13	0.113	0.688	0.216	0.178	0.558	0.858	0.069	0.177	0.557	0.066	0.228	0.937	0.577	0.032	0.244	0.088	0.908	0.684	0.909	0.813	0.053	0.151	0.411	0.448	0.918	0.751	0.229	0.207	0.455	0.784	0.397	0.434	0.786	0.563	0.14	0.643	0.213	0.244	0.284	0.154	0.315
M	26493	27158	beta	MN996532	Bat coronavirus RaTG13	0.153	1	0.654	0	0.917	0.06	0.919	0.059	0.948	0	0.004	0.998	0.006	0.706	0.385	0.932	0	0.067	0.317	0.057	0.226	0.69	0.752	0.633	0.146	0.046	0.423	0.594	0.722	0.136	0.332	0.837	0.633	0.315	0.961	0.287	0.325	0.287	0.198	0.719	0.22	0.261	0.273	0.16
orf1ab	251	21537	beta	MN996532	Bat coronavirus RaTG13	0	1	0	0	1	0	0.022	0	1	0	0	1	0	1	1	0	0	0	0	0	1	1	0.997	0	1	1	0	1	0.879	0.022	0	1	1	0.001	0.476	0.999	0.002	0.219	1	0.926	0.439	0.017	0.25	0
orf1ab polyprotein	267	21532	beta	MT040335	Pangolin coronavirus isolate PCoV_GX-P5L	0	1	0	0	1	0	0	0	1	0	0	1	0	1	1	0.002	0	0	0.008	0.001	1	1	0.996	0	0.996	1	0	1	0.991	0.051	0	1	1	0	0.688	0.99	0	0.689	1	0.972	0.875	0.001	0.238	0
orf3a protein	25353	26180	beta	MT040335	Pangolin coronavirus isolate PCoV_GX-P5L	0.607	0.985	0.295	0.013	0.738	0.023	0.999	0.034	0.5	0.008	0.022	1	0.085	0.814	0.047	0.844	0.024	0.13	0.031	0.421	0.537	0.828	0.431	0.016	0.52	0.998	0.404	0.991	0.016	0.909	0.694	0.103	0.674	0.187	0.416	0.981	0.99	0.001	0.985	0.943	0.945	0.522	0.324	0.464
orf7a protein	27351	27716	beta	MT040335	Pangolin coronavirus isolate PCoV_GX-P5L	0.113	0.964	0.618	0.057	1	0.005	0.691	0.041	0.345	0.048	0.326	0.906	0.004	0.85	0.107	0.905	0.009	0.519	0	0.491	0.182	0.984	0.931	0.009	0.6	0.959	0.444	0.998	0.002	0.852	0.003	0.784	0.766	0.65	0.54	0.569	0.798	0.265	0.994	0.724	0.358	0.856	0.507	0.823
orf6 protein	27159	27344	beta	MT040335	Pangolin coronavirus isolate PCoV_GX-P5L	0.019	0.818	0.437	0.488	0.624	0.086	0.66	0.329	0.972	0.331	0.062	0.027	0.099	0.283	0.17	0.874	0.064	0.872	0.046	0.886	0.206	0.549	0.962	0.364	0.222	0.392	0.165	0.65	0	0.715	0.326	0.449134	0.401	0.869	0.885	0.25	0.02	0.557	0.903	0.586	0.922	0.22	0.851	0.611
envelope protein	26205	26432	beta	MT040335	Pangolin coronavirus isolate PCoV_GX-P5L	0.12	0.372	0.527	0.632	0.833	0.004	0.51	0.646	0.727	0.75	0.202	0.096	0.07	0.794	0.342	0.412	0.339	0.592	0.448	0.632	0.263	0.881	0.054	0.352	0.164	0.926	0.226	0.943	0.11	0.608	0.849	0.263	0.662	0.115	0.359	0.499	0.382	0.389	0.757	0.262	0.125	0.847	0.707	0.445
nucleocapsid phosphoprotein	28230	29483	beta	MT040335	Pangolin coronavirus isolate PCoV_GX-P5L	0.178	1	0.966	0	0.974	0.005	0.837	0.395	0.228	0	0.046	1	0.214	0.945	0.019	0.579	0	0	0.095	0.76	0.019	0.995	0.418	0.762	0.129	0.974	0.162	0.996	0.103	0.346	0.228	0.647	0.765	0.087	0.963	0.103	0.61	0.243	0.259	0.974	0.088	0.696	0.586	0.016
spike protein	21540	25343	beta	MT040335	Pangolin coronavirus isolate PCoV_GX-P5L	0	1	0.386	0	1	0.001	0.895	0	0.986	0	0.004	1	0	0.248	0.854	0.999	0	0.009	0.033	0.001	0.534	1	0.927	0.131	0.305	0.99	0.107	1	0.504	0.332	0.008	0.935	0.913	0.133	0.917	0.748	0.5	0.019	0.995	0.982	0.489	0.302	0.421	0.005
NCe glycoprotein	26480	27148	beta	MT040335	Pangolin coronavirus isolate PCoV_GX-P5L	0.539	1	0.263	0	0.973	0.026	0.978	0.012	0.715	0.001	0.006	0.999	0	0.698	0.587	0.946	0.004	0.076	0.128	0.043	0.618	0.681	0.667	0.516	0.513	0.016	0.135	0.168	0.877	0.246	0.451	0.499	0.694	0.356	0.956	0.356	0.148	0.488	0.075	0.776	0.62	0.131	0.073	0.034
orf8 protein	27851	28216	beta	MT040335	Pangolin coronavirus isolate PCoV_GX-P5L	0.372	0.972	0.099	0.054	0.999	0.007	0.011	0.521	0.025	0.251	0.374	0.968	0.052	0.486	0.98	0.274	0.03	0.023	0.216	0.794	0.718	1	0.258	0.236	0.952	0.488	0.491	0.994	0.668	0.094	0.494	0.035	0.283	0.923	0.815	0.89	0.087	0.185	0.278	0.807	0.658	0.025	0.074	0.037
orf1ab	146	21414	beta	MT121216	Pangolin coronavirus isolate MP789	0	1	0	0	1	0	0.196	0	1	0	0	1	0	1	1	0.001	0	0	0	0.001	1	1	1	0	1	1	0	1	0.889	0.002	0	1	1	0.003	0.217	0.996	0.001	0.538	1	0.99	0.738	0	0.784	0
ORF3	25227	26054	beta	MT121216	Pangolin coronavirus isolate MP789	1	0.957	0.517	0	0.619	0.151	0.958	0.103	0.063	0.025	0.003	1	0.014	0.671	0.415	0.899	0.029	0.004	0.014	0.74	0.341	0.923	0.56	0.201	0.669	0.948	0.466	0.883	0.035	0.901	0.923	0.548	0.631	0.045	0.302	0.61	0.85	0.251	0.845	0.896	0.737	0.772	0.567	0.652
M	26357	27025	beta	MT121216	Pangolin coronavirus isolate MP789	0.626	1	0.536	0	0.963	0.256	0.926	0.002	0.86	0	0.006	1	0	0.33	0.529	1	0	0.115	0.043	0.032	0.342	0.454	0.708	0.597	0.074	0.063	0.037	0.485	0.913	0.895	0.531	0.05	0.767	0.53	1	0.704	0.284	0.032	0.331	0.976	0.922	0.442	0.365	0.173
E	26079	26306	beta	MT121216	Pangolin coronavirus isolate MP789	0.242	0.316	0.679	0.393	0.765	0.009	0.483	0.72	0.677	0.719	0.185	0.179	0.09	0.852	0.293	0.422	0.286	0.429	0.315	0.782	0.149	0.846	0.038	0.479	0.194	0.874	0.083	0.914	0.084	0.841	0.922	0.319	0.738	0.058	0.463	0.311	0.427	0.578	0.609	0.422	0.289289	0.89	0.694	0.563
ORF6	27036	27221	beta	MT121216	Pangolin coronavirus isolate MP789	0.06	0.847	0.341	0.386	0.313	0.041	0.636	0.636	0.925	0.114	0.103	0.126	0.274	0.474	0.291	0.427	0.055	0.423	0.29	0.808	0.275	0.818	0.988	0.394	0.211	0.343	0.004	0.378	0.256	0.816	0.05	0.609481	0.29	0.88	0.462	0.609	0.054	0.572	0.906	0.925	0.901	0.353	0.838	0.237
ORF10	29344	29460	beta	MT121216	Pangolin coronavirus isolate MP789	0.154	0.192	0.154	0.778	0.438	0	0.709	0.68	0.917	0.781	0	0.025	0.112	0.855	0.528	0.154	0.673	0.535	0.285	0.787	0.446	0.67	0.084	0.563	0.625	0.856	0.767	0.822	0.022	0.666	0.944	0.097	0.523	0.366	0.261	0.211	0.746	0.521	0.719	0.478	0.71368	0.4	0.841	0.668
N	28060	29319	beta	MT121216	Pangolin coronavirus isolate MP789	0.428	1	0.929	0	0.905	0	0.911	0.725	0.234	0	0.027	1	0.148	0.952	0.047	0.617	0	0	0.278	0.886	0.042	0.991	0.123	0.755	0.371	0.918	0.415	0.955	0.004	0.658	0.796	0.333	0.856	0.011	0.878	0.162	0.795	0.23	0.021	0.965	0.333	0.762	0.25	0.065
ORF8	27728	28045	beta	MT121216	Pangolin coronavirus isolate MP789	0.033	0.77	0.391	0.512	0.646	0.12	0.031	0.857	0.969	0.113	0.403	0.063	0.067	0.64	0.844	0.288	0.125	0.396	0.599	0.81	0.358	0.889	0.983	0.218	0.082	0.101	0.616	0.389	0.594	0.616	0.013	0.234	0.712	0.963	0.115	0.959	0.599	0.129	0.661	0.821	0.536	0.556	0.45	0.182
ORF7a	27228	27593	beta	MT121216	Pangolin coronavirus isolate MP789	0.057	0.986	0.875	0.005	0.998	0	0.542	0.323	0.822	0.005	0.078	0.913	0	0.961	0.206	0.8	0	0.134	0.236	0.449	0.044	0.999	0.298	0.345	0.43	0.986	0.511	0.995	0.046	0.615	0.444	0.3	0.795	0.161	0.478	0.478	0.783	0.547	0.929	0.511	0.537	0.552	0.68	0.381
S	21421	25218	beta	MT121216	Pangolin coronavirus isolate MP789	0.01	1	0.369	0	1	0.001	0.4	0.001	0.981	0	0.005	1	0	0.557	0.984	0.998	0	0	0.009	0.037	0.566	1	0.982	0.032	0.683	1	0.074	1	0.317	0.25	0.005	0.411	0.951	0.257	0.761	0.935	0.479	0.012	1	0.998	0.578	0.112	0.215	0.012
ORF7b	27590	27721	beta	MT121216	Pangolin coronavirus isolate MP789	0.443	0.458	0	0.325	0.334	0.56	0.679	0.151	0.273	0	0	0.984	0.321	0.7	0.429	0.161	0.427	0.167	0.545	0.038	0.535	0.442	0.519	0.171	0	0.237	0.331	0.121305	0.438	0.231	0.302	0	0	0.507	0.174	0.994	0.552	0.002	0.361	0.865	0.178389	0.367	0.15	0.095
S	23929	27903	beta	NC001846	Murine hepatitis virus	0	1	0.012	0.834	0.438	0.991	1	0	1	0	0.002	1	0.722	0.561	0.68	0.105	0.023	0.413	0	0.021	0.978	0.005	1	0.023	0.704	0.949	0.92	0.976	0.011	0.099	0.002	0.068	0.913	0.939	0.439	0.929	0.513	0.167	1	0.97	0.105	0.232	0.982	0.568
ORF1ab	210	13622	beta	NC001846	Murine hepatitis virus	0.02	1	0	0.143	0.01	1	1	0	0.993	0	0	1	0.866	0.98	0.812	0	0.004	0	0	0	1	0.035	0.983	0	0.293	1	0.903	0.089	0.001	0.981	0.173	0.981	1	0	0.012	1	0.505	0.025	1	0.482	0.993	0.652	1	0.172
ORF1ab	210	21745	beta	NC001846	Murine hepatitis virus	0	1	0	0.104	0.004	1	1	0	1	0	0	1	0.977	0.8	0.904	0	0	0	0	0	1	0.009	1	0	0.297	1	0.999	0.08	0	0.928	0.005	0.962	1	0	0	1	0.879	0.002	1	0.799	0.995	0.388	0.999	0.426
ORF2a	21771	22556	beta	NC001846	Murine hepatitis virus	0.88	0.634	0.068	0.259	0.32	0.981	0.741	0.004	0.25	0.001	0.392	1	0.336	0.586	0.665	0.26	0.7	0.175	0	0.337	0.897	0.107	0.712	0.814	0.246	0.922	0.494	0.002	0.799	0.885	0.499	0.001	0.953	0.209	0.459	0.997	0.053	0.083	0.913	0.929	0.878	0.756	0.982	0.059
M	28968	29654	beta	NC001846	Murine hepatitis virus	0.324	0.392	0.08	0.862	0.932	0.833	0.824	0	0.648	0.137	0.019	0.954	0.027	0.437	0.926	0.498	0.816	0.836	0.006	0.069	0.861	0.649	0.74	0.07	0.383	0.923	0.042	0.681	0.031	0.807	0.291	0.907	0.969	0.037	0.483	0.64	0.427	0.417	0.976	0.151	0.892	0.396	0.82	0.662
N	29733	30356	beta	NC001846	Murine hepatitis virus	0.811	0.999	0.009	0.018	0.283	0.781	0.739	0.098	0.238	0.003	0.852	0.978	0.391	0.027	0.538	0.92	0.159	0.228	0.052	0.393	0.976	0.554	0.187	0.396	0.901	0.779	0.173	0.127	0.031	0.763	0.884	0.995	0.508	0	0.141	0.53	0.763	0.683	0.569	0.156	0.271	0.916	0.499	0.119
N	29669	31033	beta	NC001846	Murine hepatitis virus	0.595	0.995	0.408	0.003	0	0.995	1	0	0.987	0	0	1	0.821	0.881	0.048	0.177	0.025	0.002	0	0.09	0.504	0.121	1	0.348	0.001	0.075	0.727	0.391	0.471	0.432	0.073	0.999	0.655	0.211	0.002	0.929	0.992	0.303	0.952	0.979	0.077	0.7	0.945	0.132
N	29454	30077	beta	NC003045	Bovine coronavirus	0.215	0.983	0.003	0.714	0.267	0.541	0.245	0.668	0.869	0.005	0.962	0.182	0.305	0.404	0.866	0.174	0.492	0.494	0.276	0.856	0.991	0.777	0.723	0.276	0.998	0.066	0.503	0.384	0.24	0.167	0.441	0.955	0.126	0.102	0.33	0.164	0.544	0.866	0.14	0.482	0.28	0.36	0.047	0.084
orf1ab	211	21494	beta	NC003045	Bovine coronavirus	0	1	0	0.004	0.876	0.999	1	0	1	0	0	1	0.38	0.313	0.979	0.129	0	0.001	0	0	1	0.728	0.985	0	0.76	1	0.977	0.084	0	1	0.014	1	1	0	0.175	0.977	0.815	0.028	1	0.073	0.995	0.983	0.999	0.853
orf1ab	211	13362	beta	NC003045	Bovine coronavirus	0.003	1	0	0.152	0.864	0.997	1	0	0.977	0	0	1	0.494	0.653	0.972	0.021	0.001	0.001	0	0	1	0.64	0.71	0	0.674	1	0.855	0.11	0.006	1	0.158	1	1	0	0.552	0.537	0.527	0.439	1	0.003	0.994	0.964	0.998	0.854
E	28422	28676	beta	NC003045	Bovine coronavirus	0.881	0.771	0.008	0.188	0.689	0.969	0.298	0.003	0.457	0.006	0.659	0.77	0.009	0.218	0.777	0.86	0.573	0.666	0.031	0.069	0.948	0.14	0.463	0.331	0.632	0.898	0.221	0.025	0.485	0.991	0.807	0.984	0.377	0.01	0.01	0.095	0.827	0.77	0.854	0.148	0.861713	0.894	0.766	0.521
BCoVgp06	27889	28026	beta	NC003045	Bovine coronavirus	0.225	0.948	0	0.123	0.717	0.328	0.629	0.013	0.661	0.12	0	0.297	0.047	0.066	0.372	0.968	0.038	0.817	0	0.273	0.688	0.247	0.225	0.325	0.688	0.753	0.039	0.291	0.078	0.96	0.661	0	0	0	0.827	0.802	0.258	0.047	0.701	0.925	0	0.668	0.139	0.498
HE	22352	23626	beta	NC003045	Bovine coronavirus	0.239	0.999	0	0.425	0.455	0.958	1	0	0.828	0	0.148	0.989	0.308	0.033	0.71	0.915	0.273	0.895	0.01	0	1	0.025	0.342	0.528	0.991	0.366	0.918	0.106	0.055	0.905	0.75	0.005	0.393	0.687	0.208	0.897	0.387	0.201	0.261	0.882	0.939	0.512	0.212	0.605
N	29393	30739	beta	NC003045	Bovine coronavirus	0	0.997	0.983	0.052	0.648	0.892	0.762	0.006	0.999	0	0.002	1	0.319	0.533	0.279	0.682	0	0.143	0.07	0.034	0.008	0.778	0.994	0.151	0	0.972	0.838	0.321	0.595	0.851	0.008	0.863	0.976	0.299	0.273	0.974	0.859	0.007	1	0.869	0.673	0.781	0.994	0.851
NS	21504	22340	beta	NC003045	Bovine coronavirus	0.178	0.98	0.101	0.218	0.421	0.942	0.799	0.009	0.933	0	0.15	0.965	0.136	0.225	0.75	0.757	0.084	0.506	0.067	0.055	0.819	0.399	0.104	0.824	0.512	0.667	0.652	0.161	0.377	0.667	0.925	0.07	0.324	0.279	0.334	0.843	0.227	0.394	0.277	0.534	0.404	0.732	0.74	0.091
49 kDa non structural protein	27722	27811	beta	NC003045	Bovine coronavirus	0.047	0.066	0.911	0.651	0.268	0.484	0	0.614	0.662	0.302	0	0.326	0.657	0.685	0.162	0.061	0.256	0.205	0.34	0.719	0.002	0.315	0.792	0.844	0.377	0.233	0.864	0.006	0	0.469	0	0.617089	0	0.264	0	0.702	0.489	0.829	0.472	0.832	0.271271	0.550321	0.889	0.705
127 kDa non structural protein	28106	28435	beta	NC003045	Bovine coronavirus	0.002	0.458	0.49	0.836	0.562	0.11	0.325	0.652	0.917	0.006	0.644	0.374	0.347	0.978	0.21	0.045	0.311	0.298	0.457	0.632	0.281	0.911	0.677	0.395	0.316	0.344	0.359	0.855	0.218	0.422	0.128	0.598	0.594	0.507	0.587	0.484	0.118	0.8	0.662	0.352	0.374	0.404	0.628	0.242
S	23641	27732	beta	NC003045	Bovine coronavirus	0.001	1	0	0.922	0.987	0.784	0.901	0	0.994	0	0.331	1	0.055	0.753	0.988	0.077	0.117	0.498	0.001	0.028	1	0.957	0.879	0.062	0.985	0.924	0.239	0.85	0.162	0.359	0.066	0.835	0.807	0.09	0.334	0.682	0.186	0.772	0.994	0.062	0.789	0.103	0.694	0.021
M	28691	29383	beta	NC003045	Bovine coronavirus	0.438	0.883	0.075	0.356	0.886	0.724	0.721	0.011	0.755	0	0.052	0.991	0.016	0.621	0.942	0.338	0.333	0.268	0.185	0.008	0.868	0.707	0.441	0.057	0.441	1	0.039	0.681	0.829	0.312	0.654	0.453	0.939	0.027	0.626	0.516	0.068	0.811	0.999	0.017	0.432	0.396	0.926	0.148
sarsp1	265	21485	beta	NC004718	SARS coronavirus Tor2	0	1	0.003	0	1	0	0.986	0	1	0	0	1	0	1	1	0	0	0	0	0.047	0.995	1	1	0	0.887	0.999	0.058	1	0.099	0.001	0	1	1	0.001	0.456	0.891	0.138	0.237	1	0.999	0.344	0	0.011	0
N	28583	28795	beta	NC004718	SARS coronavirus Tor2	0.883	0.736	0.021	0.079	0.102	0.003	0.767	0.995	0.293	0.424	0.916	0.064	0.311	0.937	0.005	0.219	0.551	0.073	0.066	1	0.906	0.866	0.294	0.41	0.738	0.291	0.446	0.8	0.173	0.947	0.952	0.217	0.259	0.023	0.273	0.088	0.945	0.371	0.168	0.454	0.249	0.898	0.148	0.855
sars3b	25689	26153	beta	NC004718	SARS coronavirus Tor2	0.016	0.439	0.888	0.745	1	0.282	0.032	0.009	0.398	0.012	0.815	0.811	0.03	0.977	0.185	0.569	0.139	0.83	0.012	0.127	0.06	0.958	0.437	0.739	0.337	0.396	0.004	0.96	0.004	0.938	0.075	0.552	0.882	0.183	0.978	0.001	0.674	0.752	0.247	0.51	0.244	0.985	0.461	0.271
sars9b	28130	28426	beta	NC004718	SARS coronavirus Tor2	0.714	0.935	0.01	0.162	0.601	0.772	0.373	0.045	0.065	0.059	0.973	0.811	0.53	0.036	0.327	0.915	0.431	0.516	0.006	0.725	0.964	0.628	0.706	0.094	0.918	0.954	0.514	0.253	0.458	0.938	0.082	1	0.42	0.003	0.127	0.815	0.278	0.646	0.964	0.099	0.997	0.467	0.794	0.913
sars7a	27273	27641	beta	NC004718	SARS coronavirus Tor2	0.001	0.995	0.866	0.072	0.96	0.004	0.945	0.133	0.827	0.009	0.122	0.887	0.328	0.785	0.012	0.758	0	0.331	0.158	0.266	0.057	0.981	0.951	0.221	0.343	0.085	0.219	0.848	0.037	0.821	0.006	0.803	0.898	0.759	0.855	0.573	0.56	0.156	0.56	0.911	0.849	0.607	0.141	0.455
M	26398	27063	beta	NC004718	SARS coronavirus Tor2	0.789	0.89	0.31	0.03	0.973	0.466	0.795	0.004	0.594	0	0.114	0.999	0.001	0.954	0.506	0.822	0.142	0.196	0.002	0.263	0.539	0.84	0.596	0.152	0.769	0.137	0.049	0.236	0.885	0.781	0.671	0.715	0.279	0.385	0.996	0.258	0.294	0.276	0.273	0.864	0.926	0.455	0.046	0.595
E	26117	26347	beta	NC004718	SARS coronavirus Tor2	0.805	0.272	0.268	0.293	0.621	0.003	0.621	0.784	0.342	0.84	0.3	0.155	0.037	0.812	0.381	0.495	0.63	0.389	0.481	0.749	0.499	0.822	0.034	0.47	0.081	0.905	0.083	0.955	0.333	0.72	0.946	0.04	0.592	0.302	0.579	0.797	0.36	0.122	0.722	0.573	0.235235	0.857	0.793	0.308
N	28120	29388	beta	NC004718	SARS coronavirus Tor2	0.299	1	0.866	0	0.258	0.065	0.988	0.415	0.65	0	0.051	1	0.663	0.913	0.003	0.536	0	0	0.021	0.953	0.09	0.975	0.949	0.551	0.023	0.692	0.165	0.986	0.021	0.597	0.053	0.893	0.974	0.048	0.946	0.025	0.838	0.421	0.744	0.972	0.09	0.842	0.818	0.508
sars8a	27779	27898	beta	NC004718	SARS coronavirus Tor2	0.029	0.716	0.405	0.318	0.555	0	0.892	0.248	0.27	0	0.258	0.915	0.641	0.934	0.007	0.133	0.103	0.082	0.17	0.403	0.148	0.904	0.111	0.901	0.259	0.093	0.724	0.773	0.202	0.588	0.229	0.589	0.171159	0.337	0.71	0.052	0.855	0.332	0.038	0.877	0.829569	0.097	0.313	0.479
sars8b	27864	28118	beta	NC004718	SARS coronavirus Tor2	0.46	0.831	0.173	0.216	0.98	0.051	0.523	0.074	0.345	0.029	0.629	0.701	0.005	0.788	0.355	0.76	0.267	0.511	0.359	0.027	0.67	0.713	0.591	0.391	0.646	0.327	0.091	0.977	0.406	0.482	0.347	0.281	0.089	0.882	0.919	0.065	0.792	0.303	0.432	0.837	0.296	0.664	0.36	0.275
sars6	27074	27265	beta	NC004718	SARS coronavirus Tor2	0.007	0.764	0.776	0.627	0.456	0.114	0.067	0.698	0.926	0.089	0.211	0.115	0.522	0.469	0.266	0.203	0.031	0.469	0.437	0.769	0.075	0.738	0.755	0.262	0.832	0.573	0.476	0.664	0.263	0.341	0.27	0.613131	0.131	0.824	0.525	0.27	0.076	0.761	0.808	0.599	0.874749	0.017	0.639	0.378
sars3a	25268	26092	beta	NC004718	SARS coronavirus Tor2	0.173	1	0.276	0.014	0.958	0.011	1	0.002	0.669	0.051	0	0.993	0.04	0.489	0.169	0.946	0.001	0.356	0.019	0.042	0.612	0.86	0.817	0.005	0.503	0.993	0.461	0.987	0.142	0.135	0.145	0.22	0.934	0.567	0.808	0.987	0.601	0.004	0.992	0.697	0.231	0.24	0.249	0.367
S	21492	25259	beta	NC004718	SARS coronavirus Tor2	0.018	1	0.03	0	0.998	0	1	0	0.93	0	0.451	1	0.018	0.96	0.013	0.914	0	0	0	0.437	0.952	1	0.944	0.063	0.382	0.97	0.528	1	0.004	0.113	0.02	0.456	0.38	0.495	0.331	0.352	0.999	0.111	0.996	0.979	0.486	0.041	0.273	0.104
sars7b	27638	27772	beta	NC004718	SARS coronavirus Tor2	0.452	0.35	0	0.579	0.157	0.553	0.84	0.127	0.466	0.098	0.161	0.644	0.397	0.47	0.32	0.293	0.666	0.458	0.452	0.074	0.759	0.133	0.621	0.523	0	0.625	0.738	0.512	0.358	0.014	0.353	0.404656	0	0.488	0.432	0.886	0.646	0.021	0.755	0.414	0	0.044	0.86	0.065
ns2	21506	22342	beta	NC006213	Human coronavirus OC43	0.104	1	0.069	0.09	0.311	0.748	0.71	0.156	0.833	0.008	0.31	0.781	0.602	0.005	0.763	0.838	0.016	0.454	0.479	0.089	0.874	0.312	0.029	0.803	0.774	0.583	0.721	0.144	0.343	0.377	0.875	0.125	0.488	0.231	0.568	0.565	0.034	0.822	0.123	0.176	0.606	0.303	0.594	0.179
orf1ab	210	21496	beta	NC006213	Human coronavirus OC43	0	1	0	0.001	0.694	1	1	0	1	0	0	1	0.716	0.339	0.955	0.073	0	0	0	0	1	0.682	0.988	0	0.53	1	0.999	0.017	0	1	0.008	1	1	0	0.065	0.997	0.92	0.007	1	0.261	0.996	0.977	1	0.87
envelope protein	28108	28362	beta	NC006213	Human coronavirus OC43	0.898	0.841	0.006	0.154	0.677	0.962	0.301	0.007	0.414	0.001	0.671	0.828	0.009	0.159	0.8	0.874	0.507	0.615	0.122	0.014	0.961	0.109	0.496	0.158	0.654	0.914	0.21	0.279	0.516	0.979	0.772	0.987	0.347	0.016	0.011	0.148	0.829	0.722	0.873	0.092	0.80402	0.900901	0.675	0.672
EYW02 gp3	22354	23628	beta	NC006213	Human coronavirus OC43	0.208	0.99	0.002	0.431	0.369	0.876	1	0	0.929	0.083	0.018	0.864	0.248	0.013	0.534	0.981	0.248	0.972	0.055	0	0.997	0.001	0.341	0.358	0.956	0.359	0.892	0.248	0.008	0.971	0.803	0.015	0.542	0.671	0.222	0.907	0.732	0.06	0.293	0.879	0.884	0.93	0.137	0.969
EYW02 gp8	29079	30425	beta	NC006213	Human coronavirus OC43	0.006	0.991	0.904	0.059	0.494	0.753	0.94	0.006	0.999	0	0.001	1	0.098	0.839	0.449	0.397	0	0.063	0.128	0.028	0.066	0.881	0.99	0.316	0.001	0.889	0.616	0.351	0.426	0.758	0.062	0.894	0.984	0.105	0.109	0.934	0.929	0.038	0.998	0.808	0.434	0.833	0.995	0.533
EYW02 gp4	23643	27704	beta	NC006213	Human coronavirus OC43	0	1	0	0.739	0.99	0.152	0.857	0.005	0.996	0	0.102	0.998	0.039	0.732	0.996	0.1	0.013	0.257	0.008	0.199	1	0.979	0.843	0.145	0.985	0.976	0.291	0.913	0.232	0.548	0.071	0.866	0.966	0.06	0.587	0.795	0.099	0.575	1	0.097	0.529	0.473	0.841	0.104
EYW02 gp7	28377	29069	beta	NC006213	Human coronavirus OC43	0.571	0.958	0.083	0.113	0.722	0.796	0.931	0	0.382	0.003	0.167	0.996	0.152	0.152	0.591	0.847	0.162	0.47	0.095	0.004	0.854	0.517	0.396	0.026	0.63	1	0.1	0.627	0.331	0.544	0.623	0.992	0.856	0.003	0.379	0.338	0.403	0.739	1	0.014	0.48	0.594	0.753	0.613
ns129	27792	28121	beta	NC006213	Human coronavirus OC43	0.003	0.658	0.764	0.668	0.354	0.241	0.233	0.712	0.973	0.008	0.318	0.332	0.523	0.868	0.25	0.107	0.064	0.281	0.182	0.912	0.1	0.871	0.631	0.476	0.367	0.281	0.308	0.653	0.314	0.488	0.114	0.58	0.762	0.419	0.667	0.417	0.052	0.845	0.55	0.406	0.791	0.375	0.583	0.158
E	27373	27621	beta	NC006577	Human coronavirus HKU1	0.05	0.883	0.478	0.307	0.983	0.144	0.081	0.098	0.978	0.308	0.094	0.027	0	0.17	0.778	0.954	0.048	0.959	0.166	0.195	0.251	0.696	0.896	0.252	0.1	0.641	0.699	0.424	0.762	0.032	0.164	0.222103	0.376	0.875	0.443	0.883	0.192	0.381	0.921	0.048	0.102	0.121	0.782	0.337
HE	21773	22933	beta	NC006577	Human coronavirus HKU1	0.006	0.966	0.049	0.791	0.988	0.779	0.723	0	0.78	0.053	0.396	0.576	0.176	0.057	0.583	0.927	0.129	0.99	0.007	0.014	0.867	0.305	0.963	0.156	0.762	0.034	0.172	0.203	0.484	1	0.012	0.775	0.755	0.887	0.968	0.688	0.297	0.01	0.276	0.985	0.999	0.871	0.045	0.897
ORF1ab	206	21753	beta	NC006577	Human coronavirus HKU1	0	1	0	1	1	0.998	0.99	0	1	0	0	1	0	0.323	1	0.279	0.011	0.979	0	0	1	0.966	0.157	0	1	1	0.016	0.995	0.195	0.993	0.632	1	0.999	0	0.259	0.916	0.181	0.185	1	0	0.986	0.907	0.989	0.356
orf4	27051	27380	beta	NC006577	Human coronavirus HKU1	0.133	0.796	0.067	0.513	1	0.27	0.348	0.001	0.608	0.03	0.113	0.82	0.001	0.552	0.901	0.783	0.311	0.851	0.07	0.003	0.788	0.502	0.966	0.021	0.529	0.276	0.099	0.864	0.116	0.95	0.013	0.736	0.772	0.557	0.133	0.87	0.756	0.122	0.826	0.83	0.696	0.878	0.199	0.391
M	27633	28304	beta	NC006577	Human coronavirus HKU1	0.001	0.765	0.191	0.942	0.53	0.358	0.822	0.115	0.851	0.035	0.057	0.831	0.845	0.595	0.765	0.029	0.329	0.399	0.375	0.101	0.684	0.677	0.169	0.391	0.881	0.856	0.614	0.128	0.449	0.903	0.551	0.642	0.496	0.363	0.369	0.585	0.209	0.662	0.801	0.604	0.714	0.867	0.751	0.646
S	22942	27012	beta	NC006577	Human coronavirus HKU1	0.098	1	0.006	0.14	0.996	0.221	0.844	0	0.877	0	0.026	1	0.009	0.573	0.985	0.483	0.013	0.159	0.094	0.004	0.989	0.992	0.035	0.243	0.989	1	0.208	0.666	0.384	0.819	0.955	0.999	0.577	0	0.311	0.674	0.637	0.366	0.985	0.043	0.811	0.61	0.857	0.111
N2	28342	28959	beta	NC006577	Human coronavirus HKU1	0.276	0.897	0.226	0.309	0.705	0.621	0.008	0.683	0.573	0.102	0.996	0.085	0.217	0.191	0.587	0.802	0.204	0.615	0.258	0.86	0.672	0.843	0.861	0.797	0.425	0.031	0.439	0.215	0.021	0.554	0.149	0.882	0.674	0.055	0.745	0.169	0.285	0.864	0.227	0.459	0.08	0.843	0.574	0.263
N	28320	29645	beta	NC006577	Human coronavirus HKU1	0.441	0.578	0.646	0.198	0.171	0.417	0.618	0.68	0.976	0.007	0.098	0.7	0.087	0.895	0.476	0.267	0.218	0.131	0.242	0.863	0.268	0.749	0.867	0.206	0.041	0.784	0.789	0.739	0.839	0.094	0.426	0.74	0.165	0.725	0.012	0.951	0.889	0.371	0.928	0.264	0.041	0.332	0.777	0.217
NS3b	25948	26307	beta	NC009019	Tylonycteris bat coronavirus HKU4	0.062	0.369	0.597	0.771	0.901	0.332	0.021	0.525	0.835	0.021	0.146	0.799	0.046	0.911	0.945	0.034	0.356	0.129	0.212	0.738	0.225	0.82	0.745	0.17	0.005	0.8	0.503	0.761	0.971	0.003	0.218	0.635	0.599	0.481	0.478	0.637	0.748	0.286	0.958	0.015	0.066	0.083	0.867	0.265
NS3c	26111	26968	beta	NC009019	Tylonycteris bat coronavirus HKU4	0.331	0.862	0.14	0.393	0.289	0.117	0.983	0.206	0.942	0.004	0.088	0.878	0.11	0.956	0.224	0.298	0.308	0.297	0.305	0.239	0.765	0.608	0.789	0.425	0.653	0.476	0.166	0.206	0.016	0.988	0.606	0.811	0.58	0.251	0.474	0.734	0.616	0.252	0.74	0.841	0.981	0.776	0.76	0.136
NS3a	25655	25930	beta	NC009019	Tylonycteris bat coronavirus HKU4	0.112	0.985	0.019	0.212	0.888	0.283	0.883	0.005	0.137	0.02	0.601	0.91	0.364	0.182	0.207	0.779	0.05	0.579	0.067	0.023	0.879	0.56	0.787	0.399	0.719	0.304	0.695	0.704	0.077	0.768	0.014	0.669339	0.192	0.59	0.563	0.277	0.853	0.149	0.57	0.788	0.401	0.73	0.316	0.671
E	27737	27985	beta	NC009019	Tylonycteris bat coronavirus HKU4	0.229	0.306	0.03	0.927	0.691	0.32	0.352	0.305	0.64	0.327	0.634	0.171	0.145	0.691	0.723	0.202	0.857	0.73	0.462	0.224	0.872	0.322	0.412	0.817	0.579	0.226	0.37	0.336	0.549	0.762	0.51	0.33	0.627	0.4	0.298	0.747	0.478	0.393	0.194	0.368	0.429	0.814	0.482	0.195
S	21570	25628	beta	NC009019	Tylonycteris bat coronavirus HKU4	0	1	0.002	0.323	1	0.313	0.535	0	0.985	0	0.009	1	0	0.665	1	0.241	0.001	0.142	0.338	0	0.994	0.969	0.962	0.002	0.974	0.903	0.263	0.934	0.316	0.759	0.005	1	0.596	0.187	0.03	0.275	0.688	0.915	0.998	0.537	0.9	0.478	0.187	0.115
ORF1ab	267	21625	beta	NC009019	Tylonycteris bat coronavirus HKU4	0	1	0	0.67	1	0.41	1	0	1	0	0	1	0	0.874	1	0	0	0	0	0	1	1	0.726	0	1	1	0.768	1	0.004	0.746	0.139	0.996	1	0	0.097	1	0.034	0.031	1	0.445	0.997	0.043	0.12	0.18
M	28000	28659	beta	NC009019	Tylonycteris bat coronavirus HKU4	0.002	0.687	0.022	0.997	0.593	0.643	0.552	0.133	0.821	0.179	0.222	0.517	0.939	0.302	0.958	0.004	0.712	0.695	0.905	0	0.946	0.061	0.165	0.039	0.999	0.87	0.402	0.476	0.598	0.41	0.312	0.709	0.265	0.589	0.854	0.898	0.006	0.104	0.859	0.417	0.692	0.11	0.346	0.682
NS3d	26984	27667	beta	NC009019	Tylonycteris bat coronavirus HKU4	0.12	0.923	0.055	0.455	0.688	0.736	0.838	0.016	0.985	0	0.321	0.871	0.021	0.703	0.455	0.705	0.198	0.715	0.302	0.009	0.872	0.264	0.933	0.378	0.628	0.851	0.277	0.734	0.159	0.376	0.175	0.959	0.213	0.608	0.085	0.319	0.638	0.83	0.981	0.479	0.019	0.961	0.936	0.601
N	28697	29968	beta	NC009019	Tylonycteris bat coronavirus HKU4	0.005	0.999	0.948	0	0.693	0.097	0.707	0.453	1	0	0.126	0.998	0	0.998	0.058	0.8	0	0.013	0.012	0.972	0.03	0.999	1	0.282	0	0.752	0	0.973	0.982	0.096	0.014	1	0.489	0.53	0.471	0.246	0.909	0.578	1	0.829	0.004	0.641	0.993	0
S	21735	25793	beta	NC009020	Pipistrellus bat coronavirus HKU5	0.291	1	0.102	0	0.994	0	0.904	0.534	0.23	0	0.005	1	0.061	0.999	0.933	0.001	0	0	0.308	0.699	0.875	1	0.579	0.032	0.283	0.999	0.233	0.999	0.341	0.005	0.168	0.92	0.89	0.004	0.51	0.029	0.561	0.99	0.989	0.328	0.307	0.006	0.471	0.002
NS3b	26134	26493	beta	NC009020	Pipistrellus bat coronavirus HKU5	0.331	0.866	0.449	0.078	0.217	0.19	0.911	0.315	0.941	0.125	0.024	0.682	0.16	0.503	0.336	0.737	0.079	0.323	0.357	0.354	0.365	0.402	0.769	0.29	0.016	0.895	0.43	0.445	0.423	0.766	0.586	0.708	0.587	0.235	0.041	0.713	0.937	0.19	0.94	0.39	0.92	0.263	0.914	0.368
NS3a	25756	26121	beta	NC009020	Pipistrellus bat coronavirus HKU5	0.086	0.959	0.605	0.048	0.969	0.002	0.775	0.378	0.772	0.054	0.018	0.975	0.006	0.928	0.56	0.366	0.008	0.046	0.305	0.436	0.23	0.922	0.805	0.276	0.04	0.723	0.321	0.551	0.509	0.546	0.154	0.823	0.756	0.183	0.768	0.449	0.669	0.374	0.87	0.545	0.86	0.176	0.796	0.044
NS3d	27154	27825	beta	NC009020	Pipistrellus bat coronavirus HKU5	0.1	0.999	0.035	0.111	0.761	0.04	0.969	0.166	0.223	0.052	0.331	0.972	0.706	0.328	0.227	0.549	0.032	0.217	0.455	0.092	0.92	0.722	0.818	0.073	0.918	0.889	0.808	0.785	0.138	0.468	0.028	0.906	0.638	0.39	0.397	0.308	0.663	0.567	0.959	0.652	0.128	0.818	0.526	0.883
NS3c	26375	27145	beta	NC009020	Pipistrellus bat coronavirus HKU5	0.073	0.989	0.098	0.316	0.676	0.083	0.962	0.191	0.695	0.01	0.047	0.99	0.429	0.749	0.488	0.153	0.064	0.119	0.545	0.072	0.817	0.625	0.801	0.024	0.841	0.478	0.553	0.892	0.03	0.454	0.096	0.633	0.986	0.247	0.491	0.878	0.517	0.097	0.759	0.762	0.616	0.303	0.132	0.353
N	28878	30161	beta	NC009020	Pipistrellus bat coronavirus HKU5	0.058	1	0.497	0	0.457	0.106	0.63	0.812	0.979	0	0.225	1	0.156	0.939	0.496	0.128	0	0	0.886	0.426	0.403	0.962	1	0.251	0.016	0.31	0.056	0.98	0.662	0.084	0.001	0.959	0.955	0.285	0.831	0.112	0.431	0.849	0.988	0.834	0.097	0.37	0.886	0.008
M	28166	28828	beta	NC009020	Pipistrellus bat coronavirus HKU5	0.428	0.963	0.032	0.278	0.746	0.027	0.999	0.055	0.171	0	0.385	1	0.419	0.997	0.101	0.029	0.277	0.02	0.488	0.028	0.942	0.852	0.126	0.239	0.996	0.65	0.684	0.857	0.008	0.077	0.755	0.303	0.189	0.337	0.105	0.516	0.838	0.353	0.377	0.822	0.053	0.607	0.123	0.063
E	27903	28151	beta	NC009020	Pipistrellus bat coronavirus HKU5	0.24	0.489	0.132	0.644	0.102	0.944	0.199	0.317	0.829	0.015	0.273	0.569	0.416	0.31	0.835	0.193	0.51	0.358	0.214	0.481	0.666	0.062	0.976	0.234	0.678	0.214	0.91	0.406	0.871	0.019	0.073	0.718	0.153	0.841	0.001	0.814	0.248	0.972	0.672	0.466	0.248	0.04	0.473	0.231
ORF1ab	261	21808	beta	NC009020	Pipistrellus bat coronavirus HKU5	0	1	0.011	0	1	0	0.995	0.205	1	0	0	1	0	1	1	0	0	0	0.194	0.44	0.987	1	1	0	0.68	1	0.147	1	0.434	0.007	0.002	0.796	1	0.01	0.419	0.999	0.034	0.006	1	1	0.104	0.017	0.669	0
N	26419	27825	beta	NC009021	Rousettus bat coronavirus HKU9	0.02	0.961	0.255	0.666	0.905	0.952	0.656	0	0.875	0	0.002	1	0.242	0.627	0.997	0.001	0.094	0.021	0.082	0	0.666	0.89	0.523	0.057	0.691	0.99	0.261	0.942	0.727	0.008	0.408	0.325	0.991	0.033	0.915	0.943	0.037	0.421	0.976	0.184	0.554	0.001	0.71	0.032
ORF1ab	229	21020	beta	NC009021	Rousettus bat coronavirus HKU9	0	1	0	1	1	0.995	1	0	1	0	0	1	0	0.493	1	0	0.92	0.988	0	0	1	0.175	1	0	1	1	0.347	0.597	0.007	0.992	0	0.908	1	0	0.127	1	0	0.53	1	0.004	1	0.453	0.986	0.572
M	25689	26357	beta	NC009021	Rousettus bat coronavirus HKU9	0	0.988	0.012	0.93	0.879	0.717	0.962	0	1	0	0.122	0.816	0.007	0.666	0.844	0.566	0.279	0.946	0.017	0.028	0.976	0.496	0.68	0.185	0.982	0.919	0.063	0.598	0.341	0.853	0.503	0.839	0.423	0.179	0.697	0.883	0.031	0.655	0.961	0.215	0.123	0.957	0.623	0.4
S	20974	24798	beta	NC009021	Rousettus bat coronavirus HKU9	0	0.951	0	1	0.999	0.72	0.999	0	0.966	0.014	0.097	0.899	0.096	0.371	1	0.049	0.994	1	0.055	0	1	0.385	0.635	0.05	1	0.264	0.115	0.992	0.01	0.732	0.207	0.275	0.886	0.41	0.895	0.147	0.091	0.781	0.48	0.057	0.861	0.425	0.03	0.481
E	25457	25696	beta	NC009021	Rousettus bat coronavirus HKU9	0.75	0.598	0.252	0.149	0.483	0.075	0.77	0.238	0.283	0.423	0.06	0.731	0.19	0.458	0.373	0.578	0.295	0.277	0.108	0.48	0.434	0.382	0.017	0.095	0.733	0.987	0.76	0.316	0.216	0.678	0.976	0.516	0.162	0.003	0.399	0.327	0.751	0.427	0.785	0.057	0.667	0.512	0.492	0.93
NS3	24795	25457	beta	NC009021	Rousettus bat coronavirus HKU9	0.015	0.952	0.203	0.588	0.402	0.725	0.438	0.209	0.975	0.019	0.002	0.942	0.332	0.267	0.995	0.094	0.121	0.146	0.298	0.265	0.651	0.533	0.517	0.844	0.859	0.04	0.332	0.232	0.486	0.469	0.55	0.082	0.861	0.573	0.321	0.355	0.182	0.778	0.051	0.855	0.91	0.074	0.195	0.144
NS7b	28433	28882	beta	NC009021	Rousettus bat coronavirus HKU9	0.001	0.997	0.315	0.394	0.762	0.696	0.772	0.008	0.97	0.004	0.003	0.983	0.313	0.113	0.896	0.439	0.005	0.419	0.021	0.091	0.511	0.596	0.352	0	0.549	0.991	0.378	0.642	0.194	0.25	0.37	0.952	0.878	0.16	0.212	0.859	0.508	0.234	0.995	0.204	0.507	0.186	0.341	0.199
NS7a	27869	28426	beta	NC009021	Rousettus bat coronavirus HKU9	0.063	0.995	0.077	0.176	0.211	0.923	0.857	0.017	0.953	0	0.028	0.989	0.43	0.092	0.782	0.581	0.033	0.323	0.068	0.048	0.821	0.178	0.539	0.062	0.704	0.672	0.143	0.432	0.57	0.191	0.737	0.534	0.77	0.332	0.796	0.905	0.332	0.067	0.726	0.562	0.177	0.299	0.266	0.009
PRCV gp09	29603	30967	beta	NC012936	Rat coronavirus Parker	0.404	0.75	0.815	0.053	0	0.996	0.993	0.002	0.966	0	0.003	1	0.875	0.78	0.099	0.178	0.07	0.012	0.024	0.069	0.138	0.069	0.999	0.785	0	0.149	0.694	0.2	0.726	0.2	0.08	0.927	0.756	0.289	0.045	0.615	0.926	0.63	0.924	0.772	0.639	0.077	0.992	0.326
PRCV gp02	183	13577	beta	NC012936	Rat coronavirus Parker	0.004	1	0	0.107	0.009	1	1	0	0.999	0	0	1	0.959	0.941	0.778	0	0.001	0	0	0	1	0.13	0.977	0	0.395	1	0.984	0.178	0	0.976	0.143	0.957	1	0	0.011	0.999	0.799	0.036	1	0.417	0.995	0.482	1	0.643
PRCV gp06	28064	28465	beta	NC012936	Rat coronavirus Parker	0.669	0.849	0.002	0.489	0.023	0.473	0.999	0.111	0.545	0.282	0.031	0.89	0.656	0.109	0.83	0.257	0.69	0.307	0.598	0.008	0.981	0.016	0.479	0.365	0.431	0.385	0.9	0.049	0.059	0.959	0.654	0.389	0.712	0.215	0.142	0.766	0.764	0.199	0.372	0.559	0.891	0.814	0.196	0.979
PRCV gp10	29667	30290	beta	NC012936	Rat coronavirus Parker	0.905	0.998	0.006	0.016	0.137	0.928	0.662	0.102	0.157	0.002	0.987	0.901	0.538	0.013	0.231	0.981	0.255	0.363	0.043	0.506	0.984	0.296	0.192	0.614	0.829	0.803	0.469	0.063	0.031	0.915	0.925	0.988	0.41	0	0.052	0.714	0.772	0.686	0.646	0.225	0.275	0.97	0.77	0.154
PRCV gp01	183	21700	beta	NC012936	Rat coronavirus Parker	0	1	0	0.139	0.002	1	1	0	1	0	0	1	0.999	0.787	0.724	0	0	0	0	0	1	0.024	1	0	0.285	1	1	0.383	0	0.903	0	0.986	1	0	0	1	0.99	0.001	1	0.693	0.996	0.212	0.999	0.919
PRCV gp04	22557	23876	beta	NC012936	Rat coronavirus Parker	0.054	0.976	0.062	0.542	0.053	0.991	0.861	0.016	0.959	0	0.376	0.998	0.821	0.57	0.542	0.111	0.189	0.165	0.075	0.092	0.892	0.153	0.728	0.886	0.846	0.139	0.837	0.006	0.162	0.853	0.443	0.04	0.796	0.372	0.065	0.886	0.125	0.927	0.282	0.776	0.974	0.296	0.744	0.518
PRCV gp03	21714	22511	beta	NC012936	Rat coronavirus Parker	0.478	0.572	0.255	0.458	0.162	0.974	0.894	0.004	0.447	0.001	0.16	0.998	0.725	0.559	0.35	0.201	0.482	0.225	0	0.301	0.622	0.141	0.934	0.532	0.386	0.51	0.617	0.146	0.608	0.684	0.074	0.029	0.947	0.599	0.711	0.985	0.099	0.032	0.884	0.982	0.629	0.56	0.927	0.163
PRCV gp08	28902	29588	beta	NC012936	Rat coronavirus Parker	0.511	0.413	0.203	0.637	0.762	0.955	0.946	0	0.432	0.017	0.004	1	0.141	0.598	0.812	0.314	0.679	0.486	0.006	0.012	0.692	0.385	0.526	0.241	0.376	0.963	0.209	0.657	0.008	0.538	0.481	0.811	0.977	0.05	0.237	0.505	0.647	0.496	0.958	0.187	0.804	0.183	0.898	0.637
PRCV gp07	28639	28905	beta	NC012936	Rat coronavirus Parker	0.524	0.196	0.291	0.583	0.147	0.968	0.322	0.078	0.728	0.277	0.243	0.366	0.255	0.129	0.633	0.658	0.676	0.768	0.318	0.089	0.459	0.045	0.158	0.38	0.486	0.93	0.782	0.544	0.617	0.388	0.918	0.711	0.301	0.028	0.233	0.507	0.375	0.695	0.791	0.021	0.583	0.361	0.78	0.996
PRCV gp05	23891	27973	beta	NC012936	Rat coronavirus Parker	0	1	0.003	0.95	0.266	0.836	1	0	0.999	0	0.032	0.999	0.983	0.108	0.424	0.233	0.01	0.814	0.001	0.019	0.995	0.065	0.979	0.404	0.959	0.349	0.732	0.857	0.031	0.365	0.01	0.013	0.995	0.879	0.484	0.895	0.409	0.263	0.934	0.917	0.363	0.434	0.721	0.181
ORF6	26993	27181	beta	NC014470	Bat coronavirus BM48	0.587	0.158	0.016	0.797	0.393	0.871	0	0.198	0.829	0.296	0.493	0.054	0.015	0.236	0.947	0.601	0.91	0.91	0.553	0.055	0.872	0.029	0.415	0.044	0.547	0.465	0.193	0.476	0.519	0.033	0.833	0.535	0.189	0.079	0.4	0.24	0.038	0.9	0.458	0.002	0.012	0.529	0.161	0.31
S	21391	25170	beta	NC014470	Bat coronavirus BM48	0	1	0.03	0	1	0.008	0.924	0	1	0	0.001	1	0	0.782	0.976	0.996	0	0.362	0	0.016	0.952	1	0.997	0.039	0.535	0.902	0.003	0.816	0.489	0.999	0.018	0.916	0.978	0.118	0.918	0.667	0.389	0.045	1	0.97	0.969	0.929	0.57	0.037
M	26299	26982	beta	NC014470	Bat coronavirus BM48	0.006	0.974	0.288	0.45	1	0.454	0.576	0	0.993	0.001	0.049	0.97	0	0.854	0.875	0.949	0.043	0.939	0.002	0.017	0.573	0.59	0.915	0.757	0.539	0.105	0.001	0.422	0.759	0.947	0.22	0.907	0.697	0.331	1	0.335	0.08	0.198	0.367	0.924	0.951	0.69	0.615	0.011
E	26018	26248	beta	NC014470	Bat coronavirus BM48	0.405	0.239	0.395	0.56	0.539	0.355	0.572	0.205	0.488	0.449	0.478	0.257	0.176	0.608	0.177	0.645	0.569	0.73	0.109	0.461	0.349	0.3	0.249	0.415	0.355	0.615	0.328	0.183	0.091	0.885	0.71	0.342	0.433	0.17	0.687	0.568	0.275	0.369	0.471	0.685	0	0.894	0.524	0.462
ORF3	25179	25994	beta	NC014470	Bat coronavirus BM48	0.287	1	0.848	0	0.954	0	0.999	0.103	0.465	0.023	0.011	0.995	0.06	0.811	0.003	0.957	0	0.085	0.252	0.151	0.094	0.986	0.438	0.037	0.559	0.757	0.016	1	0.291	0.62	0.431	0.116	0.41	0.763	0.974	0.515	0.934	0.009	0.562	0.983	0.645	0.473	0.037	0.155
ORF7a	27188	27544	beta	NC014470	Bat coronavirus BM48	0.139	0.963	0.404	0.088	0.999	0.451	0.019	0.066	0.631	0.051	0.737	0.51	0.003	0.16	0.794	0.979	0.02	0.79	0.372	0.02	0.411	0.924	0.909	0.097	0.406	0.299	0.278	0.827	0.893	0.575	0.033	0.932	0.846	0.296	0.913	0.229	0.201	0.451	0.711	0.262	0.56	0.345	0.17	0.737
ORF7b	27541	27663	beta	NC014470	Bat coronavirus BM48	0.967	0.299	0	0.064	0.506	0.352	0.102	0.437	0.035	0.153	0.377	0.805	0.056	0.541	0.696	0.37	0.582	0.129	0.844	0.078	0.515	0.546	0.461	0.476	0	0.087	0.466	0.420824	0	0.169	0.768	0.285714	0	0.082	0.709	0.137	0.141	0.784	0.26	0.097	0.211847	0.525526	0.301	0.485
N	27665	28918	beta	NC014470	Bat coronavirus BM48	0	1	0.461	0.034	0.894	0.029	0.986	0.024	0.999	0	0.001	1	0.203	0.734	0.574	0.29	0	0.024	0.023	0.249	0.46	0.956	0.88	0.38	0.181	0.912	0.857	0.205	0.534	0.041	0.065	0.314	0.985	0.404	0.056	0.987	0.078	0.503	0.987	0.607	0.141	0.098	0.828	0.031
ORF1ab	191	21384	beta	NC014470	Bat coronavirus BM48	0	1	0	0	1	0	0.994	0	1	0	0	1	0	1	1	0.014	0	0	0	0	1	1	1	0	0.801	1	0.019	1	0.221	0.034	0	1	1	0	0.69	0.982	0.04	0.06	1	0.765	0.652	0.004	0.956	0
NS2a3	22126	22254	beta	NC017083	Rabbit coronavirus HKU14	0.118	0.831	0.346	0.301	0.116	0.627	0.463	0.324	0.484	0.01	0.394	0.795	0.9	0.24	0.189	0.152	0.112	0.155	0.485	0.187	0.379	0.516	0.509	0.609	0.158	0.944	0.954	0.254	0.522	0.062	0.237	0	0.592	0.398	0.22	0.645	0.258	0.559	0.941	0.447	0.129909	0.177009	0.929	0.314
ORF1ab	209	21663	beta	NC017083	Rabbit coronavirus HKU14	0	1	0.116	0	0.562	0.996	1	0	1	0	0	1	0.635	0.132	0.323	0.816	0	0	0	0	0.867	0.057	0.925	0	0.047	1	0.98	0.28	0	1	0.149	1	1	0	0.126	1	1	0	1	0.124	1	0.99	1	0.997
NS5a	28178	28507	beta	NC017083	Rabbit coronavirus HKU14	0.006	0.437	0.753	0.773	0.853	0.374	0.244	0.154	0.937	0.055	0.639	0.112	0.11	0.798	0.131	0.675	0.187	0.878	0.069	0.422	0.106	0.436	0.597	0.417	0.667	0.419	0.052	0.745	0.157	0.863	0.239	0.834	0.408	0.599	0.851	0.289	0.312	0.396	0.718	0.604	0.603	0.845	0.671	0.356
HE	22504	23778	beta	NC017083	Rabbit coronavirus HKU14	0.11	0.983	0.005	0.625	0.844	0.773	0.803	0.005	0.955	0.005	0.21	0.866	0.043	0.193	0.945	0.72	0.332	0.818	0.109	0.008	0.992	0.136	0.238	0.571	0.992	0.274	0.766	0.188	0.201	0.824	0.82	0.001	0.575	0.538	0.12	0.915	0.112	0.517	0.169	0.523	0.593	0.855	0.121	0.712
N	29462	30796	beta	NC017083	Rabbit coronavirus HKU14	0.024	0.999	0.854	0.007	0.146	0.622	0.951	0.112	0.998	0	0.012	1	0.272	0.779	0.202	0.543	0	0.022	0.163	0.265	0.107	0.92	0.969	0.271	0	0.962	0.933	0.268	0.203	0.809	0.128	0.816	0.951	0.118	0.011	0.984	0.987	0.012	0.998	0.881	0.775	0.616	0.991	0.754
E	28494	28763	beta	NC017083	Rabbit coronavirus HKU14	0.913	0.661	0.006	0.244	0.437	0.919	0.1	0.153	0.366	0.002	0.634	0.917	0.048	0.475	0.958	0.313	0.736	0.189	0.739	0.017	0.977	0.32	0.584	0.113	0.704	0.906	0.291	0.468	0.529	0.749	0.738	0.963	0.699	0.021	0.003	0.184	0.641	0.967	0.905	0.099	0.701702	0.88989	0.71	0.393
NS2a2	21829	22020	beta	NC017083	Rabbit coronavirus HKU14	0.082	0.284	0.761	0.505	0.359	0.485	0.7	0.122	0.967	0.004	0.002	0.703	0.057	0.935	0.417	0.211	0.2	0.362	0.126	0.234	0.058	0.447	0.306	0.656	0.431	0.469	0.028	0.201	0.311	0.632	0.58	0.297	0.542	0.413	0.552	0.254	0.48	0.276	0.507	0.645	0	0.646	0.788	0.24
M	28760	29452	beta	NC017083	Rabbit coronavirus HKU14	0.282	0.993	0.037	0.159	0.958	0.198	0.888	0.016	0.516	0.007	0.101	0.996	0.041	0.436	0.852	0.559	0.118	0.282	0.268	0.009	0.917	0.943	0.375	0.045	0.572	0.998	0.089	0.673	0.409	0.447	0.558	0.637	0.966	0.017	0.642	0.538	0.146	0.657	0.988	0.025	0.577	0.433	0.632	0.263
NS2a1	21673	21804	beta	NC017083	Rabbit coronavirus HKU14	0.381	0.301	0.148	0.539	0.23	0.745	0	0.373	0.206	0.156	0.579	0.46	0.584	0.265	0.63	0.131	0.571	0.265	0.867	0.035	0.532	0.179	0.308	0.705	0.152	0.537	0.686	0.37	0.372	0.295	0.415	0.514218	0.247	0.066	0.54	0.093	0.014	0.895	0.509	0.036	0.0483042	0.681	0.711	0.627
S	23793	27881	beta	NC017083	Rabbit coronavirus HKU14	0.003	1	0	0.836	0.779	0.772	0.98	0.001	0.986	0	0.347	0.989	0.423	0.131	0.968	0.302	0.088	0.69	0.007	0.032	1	0.674	0.803	0.057	1	0.88	0.871	0.341	0.231	0.253	0.098	0.961	0.76	0.078	0.027	0.992	0.089	0.658	0.982	0.038	0.559	0.139	0.39	0.141
NS2a4	22277	22492	beta	NC017083	Rabbit coronavirus HKU14	0.579	0.192	0.037	0.8	0.061	0.802	0.781	0.144	0.656	0.191	0.138	0.495	0.349	0.368	0.7	0.193	0.884	0.554	0.208	0.231	0.854	0.164	0.044	0.577	0.962	0.149	0	0.693	0.371	0.093	0.974	0.458	0.038	0.184	0.434	0.312	0.077	0.933	0.023	0.058	0.111	0.236	0.025	0.039
orf1ab	279	21514	beta	NC019843	Middle East respiratory syndrome	0	1	0	0.005	1	0	1	0	1	0	0	1	0	1	1	0	0	0	0	0.012	1	1	1	0	0.999	1	0.685	1	0.04	0.003	0.004	1	0.99	0	0.241	0.992	0.357	0.071	1	0.786	0.392	0.001	0.188	0
S	21456	25517	beta	NC019843	Middle East respiratory syndrome	0	1	0.063	0.058	0.984	0.278	0.998	0.001	1	0	0.03	1	0.056	0.858	0.43	0.571	0	0.151	0	0.104	0.917	0.967	0.927	0.031	0.894	0.997	0.315	0.811	0.001	0.995	0.084	1	0.954	0.043	0.69	0.846	0.971	0.006	1	0.998	1	0.371	0.935	0.585
orf5	26840	27514	beta	NC019843	Middle East respiratory syndrome	0.147	0.803	0.142	0.455	0.29	0.142	0.976	0.307	0.99	0.064	0.001	0.731	0.109	0.786	0.526	0.328	0.265	0.353	0.134	0.612	0.72	0.625	0.963	0.908	0.712	0.021	0.043	0.298	0.03	0.896	0.135	0.275	0.94	0.53	0.075	0.213	0.752	0.876	0.107	0.848	0.937	0.486	0.522	0.168
orf8b	28762	29100	beta	NC019843	Middle East respiratory syndrome	0.847	0.702	0.024	0.386	0.335	0.62	0.725	0.122	0.162	0.144	0.881	0.534	0.314	0.276	0.295	0.785	0.74	0.674	0.158	0.28	0.952	0.704	0.645	0.591	0.482	0.209	0.019	0.277	0.4	0.875	0.344	0.432	0.675	0.171	0.256	0.483	0.741	0.474	0.475	0.563	0.808	0.721	0.619	0.137
orf4b	26093	26833	beta	NC019843	Middle East respiratory syndrome	0.099	0.996	0.229	0.108	0.224	0.476	0.995	0.058	0.749	0.004	0.379	0.9	0.822	0.207	0.005	0.855	0.011	0.549	0.167	0.136	0.64	0.553	0.424	0.093	0.443	0.864	0.623	0.693	0.004	0.558	0.414	0.482	0.842	0.203	0.523	0.835	0.983	0.035	0.806	0.452	0.165	0.821	0.433	0.414
M	27853	28512	beta	NC019843	Middle East respiratory syndrome	0.063	0.715	0.477	0.611	0.655	0.625	0.928	0.017	0.389	0.032	0.166	0.973	0.815	0.611	0.096	0.285	0.206	0.444	0.175	0.031	0.383	0.129	0.747	0.387	0.215	0.194	0.272	0.376	0.366	0.557	0.067	0.748	0.673	0.397	0.958	0.504	0.516	0.065	0.367	0.637	0.643	0.433	0.227	0.17
N	28566	29807	beta	NC019843	Middle East respiratory syndrome	0.294	0.999	0.713	0.002	0.747	0.359	0.873	0.049	0.855	0	0.325	1	0.045	0.971	0.024	0.803	0	0.016	0.173	0.102	0.204	0.713	0.996	0.21	0.043	0.631	0.058	0.923	0.877	0.539	0.019	0.996	0.119	0.622	0.87	0.279	0.941	0.072	0.978	0.99	0.553	0.523	0.696	0.069
orf3	25532	25843	beta	NC019843	Middle East respiratory syndrome	0.743	0.986	0.332	0.001	0.469	0.118	0.087	0.892	0.397	0.044	0.261	0.882	0.102	0.377	0.837	0.466	0.013	0.01	0.887	0.538	0.43	0.928	0.889	0.003	0.627	0.991	0.534	0.761	0.684	0.424	0.225	0.945	0.419	0.071	0.455	0.717	0.141	0.42	0.995	0.223	0.564	0.328	0.169	0.763
E	27590	27838	beta	NC019843	Middle East respiratory syndrome	0.59	0.017	0.253	0.901	0.532	0.912	0.027	0.217	0.636	0.036	0.484	0.668	0.072	0.934	0.888	0.026	0.965	0.411	0.057	0.519	0.451	0.221	0.729	0.313	0.128	0.913	0.727	0.333	0.92	0.041	0.423	0.86	0.516	0.137	0.182	0.376	0.111	0.996	0.958	0.043	0	0.079	0.95	0.17
orf4a	25852	26181	beta	NC019843	Middle East respiratory syndrome	0.328	0.607	0.225	0.439	0.606	0.317	0.734	0.138	0.67	0.01	0.189	0.94	0.129	0.904	0.437	0.168	0.368	0.187	0.473	0.078	0.535	0.562	0.914	0.148	0	0.84	0.182	0.966	0.375	0.033	0.196	0.99	0.488	0.112	0.664	0.188	0.813	0.391	0.986	0.008	0.332	0.014	0.92	0.694
orf1ab	279	13454	beta	NC019843	Middle East respiratory syndrome	0	1	0	0.002	1	0.001	0.999	0	1	0	0	1	0	1	1	0	0	0	0.001	0.031	1	1	0.952	0	0.971	1	0.48	1	0.095	0.013	0.083	1	0.925	0	0.676	0.991	0.242	0.022	1	0.664	0.232	0.012	0.28	0.007
ORF1ab	303	22045	beta	NC025217	Bat Hp betACoronavirus Zhejiang2013	0	1	0	0	1	0	0.99	0	1	0	0	1	0	1	1	0	0	0	0.063	0	0.999	1	0.337	0	0.968	1	0	1	0.768	0.015	0.446	1	1	0	1	0.126	0	0.471	1	0.351	0.727	0	0.056	0
E	28315	28554	beta	NC025217	Bat Hp betACoronavirus Zhejiang2013	0.564	0.485	0.007	0.736	0.342	0.045	0.95	0.367	0.775	0.009	0.452	0.774	0.064	0.998	0.297	0.034	0.827	0.201	0.17	0.59	0.963	0.848	0.193	0.197	0.951	0.726	0.2	0.382	0.095	0.908	0.887	0.952	0.124	0.049	0.319	0.297	0.855	0.198	0.572	0.641	0.423	0.891	0.307	0.696
M	28610	29281	beta	NC025217	Bat Hp betACoronavirus Zhejiang2013	0.347	0.999	0.873	0	0.95	0.388	0.963	0.002	0.495	0.001	0	1	0.034	0.351	0.384	0.94	0	0.028	0.018	0.071	0.073	0.334	0.421	0.941	0.027	0.162	0.005	0.371	0.643	0.836	0.535	0.461	0.99	0.044	0.962	0.353	0.724	0.15	0.165	0.993	0.381	0.88	0.724	0.003
ORF8	29534	29857	beta	NC025217	Bat Hp betACoronavirus Zhejiang2013	0.105	0.924	0.621	0.096	0.987	0.254	0.232	0.037	0.477	0.117	0.681	0.484	0.019	0.226	0.187	0.99	0.025	0.887	0.085	0.13	0.187	0.532	0.291	0.266	0.345	0.832	0.269	0.934	0.585	0.642	0.385	0.475	0.506	0.423	0.612	0.47	0.389	0.356	0.775	0.135	0.902	0.146	0.374	0.615
NA39 gp2	22058	23413	beta	NC025217	Bat Hp betACoronavirus Zhejiang2013	0.601	1	0.02	0.005	0.989	0.199	0.531	0.027	0.529	0	0.314	0.999	0.002	0.305	0.948	0.923	0.016	0.158	0.016	0.334	0.965	0.988	0.733	0.008	0.288	1	0.015	0.956	0.83	0.615	0.367	0.169	0.819	0.072	0.974	0.939	0.248	0.005	1	0.476	0.575	0.519	0.653	0.1
ORF7	29297	29515	beta	NC025217	Bat Hp betACoronavirus Zhejiang2013	0.029	0.778	0.979	0.132	0.234	0.749	0.14	0.432	0.544	0	0.056	0.988	0.934	0.493	0.123	0.044	0.008	0.011	0.921	0.011	0.004	0.48	0.286	0.553	0.169	0.62	0.941	0.423	0.569	0.252	0.251	0	0.633	0.381	0.477	0.87	0.599	0.041	0.447	0.671	0.553	0.089	0.623	0.639
N	29917	31173	beta	NC025217	Bat Hp betACoronavirus Zhejiang2013	0.125	0.997	0.72	0.002	0.508	0.047	1	0.073	0.949	0	0.006	1	0.148	0.932	0.005	0.818	0.002	0.071	0.026	0.528	0.211	0.68	0.898	0.029	0.054	0.994	0.02	1	0.228	0.115	0.203	0.541	0.944	0.284	0.903	0.301	0.986	0.021	0.996	0.458	0.482	0.092	0.496	0.081
ORF1ab	303	13946	beta	NC025217	Bat Hp betACoronavirus Zhejiang2013	0	1	0	0	1	0	0.976	0	0.907	0	0	1	0	1	1	0.015	0	0	0.185	0	0.998	1	0.013	0	0.93	1	0	1	0.663	0.081	0.815	0.997	1	0	1	0.159	0.002	0.16	1	0.405	0.341	0.143	0.034	0
ORF4	27523	28260	beta	NC025217	Bat Hp betACoronavirus Zhejiang2013	0.269	0.988	0.296	0.025	0.765	0.121	0.915	0.118	0.437	0	0.151	1	0.3	0.937	0.283	0.194	0.006	0.009	0.035	0.525	0.569	0.85	0.042	0.807	0.138	0.651	0.559	0.954	0.03	0.075	0.89	0.273	0.869	0.013	0.057	0.008	0.968	0.972	0.227	0.152	0.416	0.093	0.322	0.176
S	23563	27516	beta	NC025217	Bat Hp betACoronavirus Zhejiang2013	0.053	1	0	0	1	0	0.953	0.009	0.854	0	0.041	1	0	0.993	0.994	0.276	0	0	0.294	0.008	1	1	0.892	0.084	0.696	0.894	0.001	1	0.959	0.044	0.066	0.98	0.855	0.015	0.999	0.165	0.07	0.407	0.952	0.822	0.215	0.097	0.319	0.001
S	23777	27853	beta	NC026011	BetACoronavirus HKU24	0.005	1	0.001	0.223	0.476	0.391	0.998	0.022	0.884	0	0.095	1	0.898	0.744	0.834	0.004	0.004	0.004	0.143	0.046	0.998	0.889	0.873	0.58	0.739	0.597	0.956	0.535	0.061	0.298	0.031	0.438	0.971	0.077	0.549	0.15	0.565	0.83	0.886	0.838	0.981	0.001	0.804	0.42
E	28645	28893	beta	NC026011	BetACoronavirus HKU24	0.617	0.545	0.32	0.212	0.23	0.968	0.408	0.046	0.666	0.014	0.424	0.703	0.149	0.246	0.392	0.749	0.329	0.577	0.016	0.457	0.431	0.385	0.394	0.105	0.09	0.955	0.596	0.156	0.419	0.95	0.76	0.957958	0.554	0.006	0.579	0.413	0.947	0.08	0.933	0.059	0.511512	0.838839	0.741	0.921
NS4	27946	28356	beta	NC026011	BetACoronavirus HKU24	0.402	0.385	0.066	0.831	0.052	1	0.732	0.004	0.403	0.051	0.507	0.811	0.899	0.037	0.566	0.43	0.824	0.821	0.311	0.001	0.877	0	0.235	0.044	0.636	0.741	0.34	0.144	0.23	0.915	0.724	0.669	0.156	0.206	0.921	0.865	0.192	0.023	0.577	0.178	0.875	0.575	0.218	0.99
ORF1ab	213	21637	beta	NC026011	BetACoronavirus HKU24	0	1	0	0.002	0.105	0.974	1	0	1	0	0	1	0.333	0.998	0.999	0	0	0	0	0	1	0.972	0.998	0	0.991	1	1	0.242	0	0.815	0.094	1	1	0	0	1	0.877	0.083	1	0.768	0.615	0.857	1	0.339
NS5	28338	28652	beta	NC026011	BetACoronavirus HKU24	0.014	0.654	0.914	0.353	0.539	0.774	0.315	0.142	0.981	0.063	0.004	0.705	0.234	0.368	0.574	0.542	0.028	0.478	0.017	0.654	0.031	0.168	0.957	0.501	0.102	0.177	0.774	0.02	0.25	0.75	0.185	0.85	0.974	0.098	0.273	0.453	0.431	0.622	0.766	0.448	0.974975	0.198	0.744	0.441
N	29613	30944	beta	NC026011	BetACoronavirus HKU24	0.494	0.981	0.404	0.014	0.003	0.922	1	0	0.835	0	0.002	1	0.895	0.659	0.024	0.458	0.031	0.031	0.011	0.023	0.5	0.019	0.7	0.768	0	0.987	0.778	0.425	0.073	0.716	0.588	0.003	0.91	0.156	0.166	0.885	0.995	0.008	0.952	0.922	0.621	0.637	0.993	0.321
N2	29596	30288	beta	NC026011	BetACoronavirus HKU24	0.38	0.874	0.001	0.88	0.048	0.643	0.409	0.798	0.986	0	0.904	0.162	0.111	0.89	0.929	0.018	0.787	0.367	0.181	0.978	0.994	0.409	0.895	0.502	0.982	0.372	0.479	0.296	0.148	0.683	0.657	0.785	0.585	0.016	0.487	0.032	0.718	0.948	0.721	0.63	0.712	0.669	0.781	0.3
HE	22484	23761	beta	NC026011	BetACoronavirus HKU24	0.666	0.805	0.08	0.299	0.001	0.988	0.96	0.121	0.981	0.005	0.061	0.924	0.675	0.178	0.666	0.451	0.444	0.306	0.027	0.696	0.866	0.017	0.703	0.4	0.554	0.991	0.934	0.185	0.333	0.615	0.81	0.091	0.814	0.267	0.005	0.922	0.737	0.56	0.993	0.49	0.346	0.672	0.991	0.684
SF15 gp02	21639	22469	beta	NC026011	BetACoronavirus HKU24	0.318	0.993	0.273	0.023	0.47	0.216	0.895	0.205	0.487	0.046	0.027	0.994	0.501	0.181	0.63	0.536	0.011	0.046	0.39	0.179	0.59	0.601	0.781	0.542	0.034	0.895	0.202	0.386	0.764	0.517	0.159	0.047	0.959	0.547	0.935	0.56	0.348	0.157	0.909	0.872	0.507	0.451	0.896	0.306
M	28908	29603	beta	NC026011	BetACoronavirus HKU24	0.606	0.904	0.106	0.147	0.122	0.905	0.842	0.077	0.549	0.007	0.177	0.985	0.589	0.166	0.673	0.43	0.243	0.164	0.241	0.13	0.806	0.385	0.648	0.054	0.724	0.967	0.596	0.458	0.325	0.454	0.415	0.937	0.702	0.055	0.146	0.913	0.364	0.445	0.964	0.233	0.501	0.418	0.585	0.49
p10	27994	28269	beta	NC030886	Rousettus bat coronavirus isolate	0.046	0.993	0.076	0.249	0.516	0.332	0.911	0.049	0.497	0.132	0.383	0.727	0.688	0.109	0.217	0.772	0.044	0.626	0.454	0.012	0.794	0.216	0.689	0.14	0.232	0.789	0.876	0.31	0.11	0.021	0.198	0.434	0.969	0.161	0.331	0.991	0.432	0.013	0.899	0.242	0.032	0.599	0.368	0.117
ORF1ab	235	21155	beta	NC030886	Rousettus bat coronavirus isolate	0	1	0	0.475	1	0.183	1	0	1	0	0	1	0	1	1	0	0	0	0	0	1	1	0.983	0	1	1	0.002	0.976	0	1	0.035	1	1	0	0.921	0.963	0.43	0	1	1	1	0.261	0.871	0
S	21121	24993	beta	NC030886	Rousettus bat coronavirus isolate	0	1	0	0.21	1	0.002	1	0	1	0	0	1	0	0.995	1	0.264	0	0.132	0.009	0	1	0.977	0.71	0.083	0.992	0.871	0.019	0.988	0.062	0.936	0.477	0.057	0.957	0.344	0.996	0.864	0.181	0.001	0.945	0.998	0.626	0.97	0.265	0.005
N	26627	27958	beta	NC030886	Rousettus bat coronavirus isolate	0.001	1	0.001	0.174	0.991	0.188	0.914	0	0.993	0	0.184	1	0.003	0.836	0.971	0.178	0.001	0.073	0.129	0.002	0.997	0.836	0.903	0.009	0.969	0.636	0.062	0.921	0.209	0.806	0.463	0.968	0.428	0.282	0.9	0.807	0.75	0	0.92	0.982	0.738	0.665	0.057	0.021
M	25914	26579	beta	NC030886	Rousettus bat coronavirus isolate	0.246	0.986	0.148	0.075	0.923	0.11	0.886	0.074	0.572	0.002	0.014	1	0.083	0.841	0.93	0.056	0.052	0.003	0.333	0.061	0.759	0.965	0.186	0.785	0.281	0.832	0.105	0.487	0.037	0.643	0.72	0.374	0.992	0.002	0.948	0.218	0.22	0.507	0.594	0.803	0.723	0.533	0.808	0.131
NS7b	28863	29444	beta	NC030886	Rousettus bat coronavirus isolate	0.053	0.952	0.038	0.656	0.761	0.322	0.988	0.007	0.89	0.001	0.3	0.908	0.117	0.804	0.205	0.58	0.234	0.73	0.099	0.027	0.911	0.348	0.09	0.146	0.797	0.85	0.635	0.134	0.002	0.512	0.848	0.889	0.958	0.002	0.123	0.64	0.546	0.544	0.614	0.023	0.924	0.136	0.271	0.323
NS7a	28287	28850	beta	NC030886	Rousettus bat coronavirus isolate	0.772	0.598	0.007	0.619	0.356	0.684	0.998	0	0.279	0	0.205	1	0.381	0.969	0.134	0.15	0.821	0.289	0.005	0.056	0.981	0.052	0.099	0.14	0.92	0.928	0.256	0.337	0.576	0.493	0.915	0.027	0.608	0.31	0.93	0.689	0.152	0.116	0.696	0.793	0.046	0.908	0.281	0.134
E	25676	25906	beta	NC030886	Rousettus bat coronavirus isolate	0.033	0.863	0	0.821	0.895	0.073	0.556	0.081	0.843	0.021	0.47	0.557	0.023	0.882	0.781	0.208	0.49	0.617	0.128	0.348	0.994	0.979	0.564	0.243	0.478	0.927	0.687	0.259	0.588	0.383	0.625	0.787	0.522	0.069	0.437	0.312	0.166	0.807	0.94	0.041	0.26	0.503	0.897	0.801
NS3	24990	25676	beta	NC030886	Rousettus bat coronavirus isolate	0.153	0.866	0.038	0.717	0.792	0.427	0.994	0.001	0.588	0	0.002	1	0.241	0.937	0.827	0.02	0.472	0.089	0.03	0.014	0.919	0.288	0.938	0.154	0.43	0.754	0.026	0.924	0.053	0.325	0.03	0.988	0.977	0.312	0.925	0.364	0.176	0.284	0.967	0.552	0.785	0.084	0.874	0.061
NS7c	29444	29893	beta	NC030886	Rousettus bat coronavirus isolate	0.201	0.937	0.14	0.222	0.767	0.421	0.888	0.011	0.519	0.023	0.101	0.985	0.204	0.357	0.574	0.602	0.127	0.367	0.074	0.069	0.743	0.335	0.441	0.211	0.615	0.435	0.555	0.769	0.051	0.066	0.389	0.383	0.968	0.185	0.636	0.897	0.147	0.194	0.431	0.306	0.073	0.303	0.199	0.152
N	28311	29558	beta	NC034440	Bat coronavirus isolate	0.26	0.815	0.914	0.024	0.855	0.695	0.735	0.006	0.713	0	0.131	1	0.054	1	0.056	0.08	0.022	0	0.037	0.059	0.05	0.723	0.995	0.824	0	0.842	0.024	0.986	0.971	0.034	0.008	0.954	0.82	0.215	0.979	0.095	0.918	0.341	0.997	0.75	0.345	0.021	1	0.004
ORF3	25284	25589	beta	NC034440	Bat coronavirus isolate	0.009	0.979	0.859	0.071	0.988	0.119	0.103	0.259	0.558	0.027	0.511	0.766	0.1	0.578	0.202	0.707	0.001	0.301	0.496	0.17	0.05	0.888	0.328	0.476	0.745	0.145	0.472	0.172	0.527	0.851	0.056	0.738	0.348	0.7	0.706	0.33	0.303	0.624	0.166	0.837	0.937	0.427	0.115	0.785
ORF5	26586	27263	beta	NC034440	Bat coronavirus isolate	0.024	1	0.016	0.042	0.162	0.012	1	0.082	0.996	0.003	0.001	0.957	0.359	0.29	0.163	0.837	0.002	0.288	0.116	0.248	0.965	0.874	0.594	0.334	0.77	0.382	0.254	0.876	0.258	0.807	0.349	0.901	0.92	0.032	0.165	0.291	0.732	0.744	0.432	0.314	0.656	0.645	0.082	0.835
S	21232	25269	beta	NC034440	Bat coronavirus isolate	0.021	1	0	0.005	0.999	0.023	0.993	0.005	0.976	0	0.091	1	0.002	0.969	0.951	0.131	0	0.001	0.061	0.051	1	1	0.892	0.033	0.999	0.952	0.039	0.999	0.013	0.62	0.162	0.886	0.966	0.036	0.887	0.67	0.339	0.147	0.992	0.998	0.463	0.657	0.506	0.006
ORF4a	25598	25927	beta	NC034440	Bat coronavirus isolate	0.007	0.924	0.685	0.271	0.392	0.586	0.499	0.235	0.996	0.062	0.014	0.476	0.135	0.181	0.747	0.707	0.023	0.566	0.102	0.569	0.159	0.364	0.876	0.302	0.008	0.885	0.409	0.443	0.578	0.526	0.589	0.751	0.931	0.131	0.399	0.436	0.718	0.23	0.991	0.227	0.972	0.053	0.96	0.152
E	27342	27590	beta	NC034440	Bat coronavirus isolate	0.321	0.569	0.337	0.307	0.492	0.71	0.163	0.325	0.526	0.01	0.449	0.878	0.286	0.64	0.649	0.156	0.3	0.163	0.196	0.49	0.382	0.532	0.754	0.953	0.335	0.189	0.382	0.544	0.443	0.44	0.182	0.312	0.327	0.708	0.327	0.151	0.537	0.797	0.436	0.951	0.378	0.419	0.973	0.355
ORF4b	25803	26579	beta	NC034440	Bat coronavirus isolate	0.004	0.973	0.765	0.178	0.752	0.342	0.555	0.2	0.676	0.001	0.494	0.964	0.692	0.669	0.07	0.39	0.005	0.177	0.069	0.608	0.149	0.942	0.093	0.39	0.834	0.728	0.663	0.914	0.01	0.42	0.437	0.504	0.406	0.527	0.376	0.243	0.951	0.371	0.493	0.827	0.916	0.076	0.506	0.601
ORF1b	13416	21290	beta	NC034440	Bat coronavirus isolate	0	1	0.001	0.507	0.999	0.054	0.977	0	1	0	0	1	0.01	1	1	0	0	0	0	0.045	0.997	1	0.994	0.002	0.984	0.959	0.543	0.85	0.253	0.332	0.005	1	0.945	0.061	0.124	0.999	0.58	0.008	0.999	0.999	0.552	0.179	0.676	0.002
M	27605	28264	beta	NC034440	Bat coronavirus isolate	0.122	0.926	0.564	0.138	0.841	0.122	0.921	0.076	0.555	0.028	0.019	0.991	0.283	0.8	0.255	0.387	0.028	0.117	0.054	0.424	0.293	0.53	0.885	0.104	0.159	0.85	0.299	0.866	0.672	0.192	0.052	0.515	0.957	0.311	0.811	0.875	0.224	0.11	0.966	0.414	0.587	0.096	0.608	0.407
ORF1a	61	13227	beta	NC034440	Bat coronavirus isolate	0	1	0	0.007	1	0.055	0.999	0	1	0	0	1	0	1	1	0	0	0	0.003	0	1	1	0.998	0	0.96	1	0.272	0.999	0.257	0.123	0.029	1	0.999	0	0.425	0.999	0.079	0.013	1	0.721	0.854	0.007	0.687	0.001
ORF1ab	278	21513	beta	NC038294	BetACoronavirus England 1 isolate	0	1	0	0.001	1	0	1	0	1	0	0	1	0	1	1	0	0	0	0.001	0.015	1	1	1	0	0.994	1	0.665	1	0.057	0.002	0.003	1	0.994	0.001	0.29	0.998	0.281	0.08	1	0.767	0.465	0	0.247	0
S	21455	25516	beta	NC038294	BetACoronavirus England 1 isolate	0	1	0.046	0.06	0.992	0.187	0.999	0	0.998	0	0.034	1	0.024	0.895	0.469	0.528	0	0.113	0	0.159	0.939	0.985	0.876	0.04	0.881	0.99	0.302	0.861	0.001	0.987	0.109	0.999	0.916	0.05	0.665	0.869	0.967	0.003	1	0.999	1	0.296	0.924	0.5
ORF5	26839	27513	beta	NC038294	BetACoronavirus England 1 isolate	0.104	0.88	0.176	0.389	0.331	0.05	0.979	0.458	0.994	0.052	0	0.751	0.101	0.856	0.534	0.277	0.154	0.232	0.197	0.696	0.678	0.829	0.934	0.901	0.677	0.035	0.029	0.371	0.02	0.862	0.159	0.285	0.971	0.501	0.092	0.143	0.761	0.909	0.142	0.84	0.842	0.516	0.56	0.179
N	28565	29800	beta	NC038294	BetACoronavirus England 1 isolate	0.387	0.997	0.752	0	0.804	0.48	0.813	0.025	0.793	0	0.295	1	0.022	0.961	0.056	0.836	0	0.016	0.143	0.079	0.179	0.571	0.987	0.267	0.05	0.76	0.055	0.85	0.898	0.672	0.038	0.999	0.12	0.425	0.792	0.334	0.939	0.067	0.962	0.987	0.707	0.499	0.748	0.068
ORF4b	26092	26832	beta	NC038294	BetACoronavirus England 1 isolate	0.09	0.997	0.262	0.086	0.346	0.405	0.986	0.089	0.717	0.007	0.41	0.904	0.745	0.247	0.013	0.843	0.013	0.474	0.234	0.122	0.63	0.685	0.41	0.121	0.481	0.848	0.54	0.65	0.008	0.558	0.39	0.499	0.821	0.207	0.603	0.802	0.966	0.044	0.79	0.51	0.213	0.791	0.404	0.489
M	27852	28511	beta	NC038294	BetACoronavirus England 1 isolate	0.063	0.709	0.472	0.652	0.65	0.656	0.936	0.018	0.371	0.033	0.204	0.969	0.832	0.619	0.107	0.282	0.222	0.475	0.194	0.025	0.382	0.127	0.757	0.399	0.239	0.218	0.263	0.416	0.36	0.544	0.063	0.685	0.682	0.439	0.958	0.534	0.519	0.041	0.351	0.67	0.609	0.428	0.225	0.177
ORF3	25531	25842	beta	NC038294	BetACoronavirus England 1 isolate	0.735	0.988	0.286	0.002	0.473	0.059	0.066	0.947	0.41	0.041	0.263	0.886	0.105	0.445	0.911	0.318	0.012	0.003	0.844	0.793	0.506	0.981	0.914	0.001	0.705	0.982	0.536	0.895	0.75	0.215	0.227	0.958	0.45	0.073	0.482	0.673	0.106	0.547	0.992	0.158	0.433	0.162	0.144	0.596
E	27589	27837	beta	NC038294	BetACoronavirus England 1 isolate	0.59	0.016	0.237	0.924	0.553	0.889	0.035	0.2	0.626	0.032	0.481	0.655	0.069	0.928	0.898	0.036	0.967	0.404	0.074	0.553	0.497	0.222	0.731	0.296	0.115	0.914	0.717	0.325	0.916	0.028	0.421	0.843	0.517	0.152	0.182	0.379	0.115	0.998	0.961	0.043	0	0.06	0.96	0.188
ORF4a	25851	26180	beta	NC038294	BetACoronavirus England 1 isolate	0.37	0.511	0.257	0.481	0.443	0.49	0.69	0.128	0.681	0.017	0.177	0.929	0.224	0.84	0.469	0.148	0.459	0.212	0.47	0.086	0.539	0.392	0.906	0.094	0	0.872	0.404	0.934	0.302	0.015	0.206	0.988	0.484	0.091	0.4	0.186	0.886	0.524	0.99	0	0.26	0.011	0.919	0.89
ORF1ab	278	13453	beta	NC038294	BetACoronavirus England 1 isolate	0	1	0	0	1	0.001	0.996	0	1	0	0	1	0	1	1	0	0	0	0	0.036	1	1	0.951	0	0.952	1	0.358	1	0.172	0.015	0.104	1	0.951	0	0.76	0.977	0.171	0.042	1	0.659	0.284	0.004	0.325	0.003
ORF1ab	241	21692	beta	NC039207	BetACoronavirus ErinACeus VMC DEU	0	1	0	0.613	0.911	0.97	1	0	1	0	0	1	0.059	0.094	1	0	0	0.002	0.001	0	1	0.863	0.959	0	1	1	1	0.925	0	0.002	0.015	0.995	1	0	0	1	0.323	0.512	1	0.001	0.435	0.001	0.949	0.371
ORF4b	26123	26794	beta	NC039207	BetACoronavirus ErinACeus VMC DEU	0.076	1	0.006	0.017	0.781	0.056	0.998	0.015	0.77	0	0.4	0.996	0.2	0.342	0.193	0.904	0.002	0.222	0.266	0.007	0.982	0.914	0.821	0.058	0.678	0.695	0.586	0.35	0.095	0.937	0.115	0.999	0.454	0.262	0.39	0.906	0.809	0.051	0.902	0.657	0.447	0.99	0.286	0.614
ORF8b	28598	29197	beta	NC039207	BetACoronavirus ErinACeus VMC DEU	0.313	1	0	0.307	0.513	0.29	0.813	0.21	0.98	0	0.855	0.805	0.002	0.825	0.88	0.506	0.247	0.378	0.085	0.6	1	0.963	0.996	0.024	0.964	0.025	0.011	0.81	0.006	0.879	0.109	0.98	0.59	0.131	0.927	0.014	0.483	0.736	0.728	0.692	0.556	0.879	0.133	0.626
M	27842	28498	beta	NC039207	BetACoronavirus ErinACeus VMC DEU	0	0.95	0.09	0.983	0.99	0.121	0.779	0.018	0.995	0	0.352	0.662	0.026	0.966	0.665	0.148	0.231	0.833	0.591	0	0.838	0.979	0.444	0.312	0.879	0.917	0.003	0.488	0.713	0.839	0.258	0.88	0.789	0.096	0.968	0.751	0.12	0.13	0.919	0.204	0.846	0.522	0.77	0.009
S	21610	25602	beta	NC039207	BetACoronavirus ErinACeus VMC DEU	0.001	1	0	0.807	0.394	0.381	1	0	1	0	0.007	1	0.325	0.559	0.608	0.395	0.063	0.758	0.002	0.01	1	0.47	0.778	0.097	0.982	0.936	0.682	0.99	0.003	0.623	0.235	0.565	0.622	0.324	0.095	0.27	0.946	0.642	0.992	0.346	0.721	0.454	0.634	0.271
ORF3a	25620	25937	beta	NC039207	BetACoronavirus ErinACeus VMC DEU	0.1	1	0.005	0.072	0.669	0.383	0.874	0.011	0.851	0	0.363	0.937	0.118	0.222	0.537	0.825	0.004	0.382	0.007	0.127	0.963	0.73	0.564	0.185	0.616	0.884	0.66	0.798	0.067	0.495	0.393	0.94	0.181	0.328	0.437	0.345	0.947	0.063	0.877	0.616	0.695	0.342	0.451	0.691
N	28552	29826	beta	NC039207	BetACoronavirus ErinACeus VMC DEU	0	1	0.464	0.258	0.807	0.045	0.993	0.028	1	0	0	0.996	0.069	0.797	0.622	0.405	0	0.229	0.205	0.047	0.436	0.959	0.919	0.076	0.097	0.889	0.193	0.949	0.094	0.351	0.07	0.793	0.995	0.221	0.265	0.501	0.867	0.301	0.997	0.267	0.24	0.565	0.645	0.018
E	27579	27827	beta	NC039207	BetACoronavirus ErinACeus VMC DEU	0.16	0.425	0.346	0.63	0.169	0.56	0.537	0.438	0.945	0.077	0.141	0.233	0.205	0.615	0.504	0.34	0.445	0.547	0.907	0.032	0.408	0.293	0.606	0.446	0.18	0.754	0.8	0.231	0.657	0.348	0.51	0.321	0.107	0.654	0.109	0.471	0.701	0.676	0.818	0.336	0.459	0.182	0.813	0.366
ORF3b	25714	26136	beta	NC039207	BetACoronavirus ErinACeus VMC DEU	0.029	0.914	0.665	0.347	0.696	0.804	0.058	0.239	0.977	0	0.059	0.888	0.091	0.552	0.943	0.2	0.031	0.202	0.387	0.219	0.177	0.445	0.853	0.401	0.013	0.698	0.548	0.267	0.493	0.315	0.368	0.572	0.55	0.085	0.264	0.079	0.362	0.943	0.919	0.128	0.147	0.61	0.918	0.473
ORF5	26804	27505	beta	NC039207	BetACoronavirus ErinACeus VMC DEU	0.414	0.997	0.001	0.227	0.831	0.057	0.907	0.165	0.689	0.004	0.639	0.843	0.035	0.582	0.699	0.642	0.228	0.408	0.066	0.527	0.999	0.892	0.689	0.061	0.955	0.726	0.569	0.986	0.037	0.201	0.336	0.998	0.173	0.024	0.271	0.35	0.535	0.785	0.798	0.013	0.037	0.575	0.117	0.733
ORF4a	25891	26136	beta	NC039207	BetACoronavirus ErinACeus VMC DEU	0.179	0.855	0.507	0.125	0.278	0.473	0.143	0.705	0.967	0	0.072	0.814	0.052	0.816	0.865	0.151	0.07	0.038	0.656	0.532	0.247	0.472	0.844	0.4	0	0.607	0.585	0.665	0.637	0.027	0.598	0	0.419	0.074	0.068	0.106	0.655	0.895	0.875	0.055	0.007	0.444	0.887	0.135
ORF1a	241	13605	beta	NC039207	BetACoronavirus ErinACeus VMC DEU	0	1	0	0.623	0.693	0.961	1	0	1	0	0	1	0.231	0.205	1	0.001	0	0.01	0.005	0	1	0.729	0.729	0	0.998	1	1	0.802	0	0.025	0.193	0.718	1	0	0.001	1	0.379	0.261	1	0.001	0.626	0.002	0.868	0.571
M	26523	27191	beta	NC045512	SARS-CoV-2	0.386	0.997	0.251	0.008	0.929	0.076	0.902	0.067	0.839	0.004	0.004	0.996	0.001	0.569	0.794	0.856	0.009	0.125	0.059	0.291	0.634	0.466	0.425	0.758	0.231	0.053	0.124	0.6	0.95	0.143	0.665	0.263	0.788	0.251	0.986	0.221	0.081	0.68	0.073	0.588	0.53	0.081	0.24	0.03
ORF7a	27394	27759	beta	NC045512	SARS-CoV-2	0.333	0.992	0.502	0.003	0.996	0	0.605	0.382	0.546	0.106	0.236	0.779	0	0.828	0.296	0.928	0.002	0.226	0.191	0.563	0.264	0.998	0.809	0.12	0.384	0.903	0.132	0.996	0.046	0.875	0.149	0.917	0.829	0.072	0.941	0.296	0.712	0.357	0.923	0.576	0.666	0.839	0.514	0.673
E	26245	26472	beta	NC045512	SARS-CoV-2	0.317	0.171	0.507	0.604	0.74	0.005	0.545	0.629	0.619	0.805	0.228	0.102	0.075	0.827	0.317	0.43	0.536	0.588	0.236	0.774	0.252	0.733	0.092	0.397	0.142	0.832	0.088	0.895	0.089	0.869	0.865	0.291	0.714	0.093	0.429	0.385	0.442	0.46	0.643	0.442	0.428428	0.842	0.738	0.601
ORF6	27202	27387	beta	NC045512	SARS-CoV-2	0.033	0.818	0.641	0.436	0.584	0.202	0.216	0.377	0.884	0.087	0.276	0.134	0.367	0.303	0.136	0.602	0.043	0.634	0.08	0.818	0.106	0.608	0.817	0.392	0.645	0.23	0.02	0.511	0.143	0.832	0.091	0.704272	0.038	0.903	0.174	0.392	0.32	0.798	0.597	0.85	0.839	0.453	0.534	0.324
ORF10	29558	29674	beta	NC045512	SARS-CoV-2	0.151	0.218	0.139	0.818	0.61	0	0.54	0.706	0.944	0.783	0	0.033	0.063	0.867	0.7	0.145	0.682	0.545	0.277	0.781	0.469	0.781	0.074	0.578	0.641	0.823	0.639	0.819	0.048	0.679	0.967	0.108	0.504	0.417	0.412	0.2	0.53	0.542	0.686	0.481	0.720085	0.388	0.817	0.669
ORF3a	25393	26220	beta	NC045512	SARS-CoV-2	0.976	0.934	0.843	0	0.91	0.092	0.811	0.089	0.283	0	0	1	0	0.934	0.4	0.854	0.012	0.001	0.003	0.837	0.084	0.986	0.889	0.112	0.49	0.924	0.116	0.987	0.377	0.669	0.534	0.211	0.824	0.251	0.522	0.802	0.298	0.332	0.949	0.961	0.144	0.63	0.648	0.119
N	28274	29533	beta	NC045512	SARS-CoV-2	0.732	1	0.785	0	0.388	0.007	0.985	0.747	0.235	0	0.048	1	0.489	0.946	0.017	0.388	0	0	0.201	0.932	0.164	0.975	0.608	0.645	0.083	0.909	0.481	0.945	0.051	0.45	0.473	0.475	0.844	0.036	0.636	0.216	0.944	0.284	0.282	0.95	0.382	0.527	0.541	0.166
ORF7b	27756	27887	beta	NC045512	SARS-CoV-2	0.641	0.31	0	0.336	0.585	0.318	0.886	0.062	0.04	0.065	0	0.972	0.279	0.737	0.245	0.222	0.594	0.252	0.351	0.031	0.639	0.513	0.246	0.024	0	0.711	0.363	0.162437	0.291	0.288	0.708	0.437433	0	0.138	0.122	0.993	0.675	0	0.602	0.589	0.659919	0.1	0.145	0.29
ORF1ab	266	13483	beta	NC045512	SARS-CoV-2	0	1	0	0	1	0	0.014	0	1	0	0	1	0	0.993	1	0.48	0	0	0.001	0	1	1	0.971	0	0.999	1	0	1	0.987	0.267	0.005	1	0.999	0.001	0.928	0.991	0	0.181	1	0.711	0.609	0.139	0.237	0
ORF8	27894	28259	beta	NC045512	SARS-CoV-2	0.153	0.865	0.161	0.338	0.696	0.08	0.063	0.837	0.759	0.179	0.206	0.439	0.12	0.508	0.944	0.152	0.131	0.107	0.364	0.931	0.611	0.976	0.515	0.103	0.144	0.316	0.517	0.833	0.771	0.149	0.333	0.471	0.723	0.254	0.3	0.831	0.541	0.275	0.432	0.108	0.106	0.379	0.106	0.103
S	21563	25384	beta	NC045512	SARS-CoV-2	0.001	1	0.08	0	1	0.012	0.585	0.003	0.995	0	0.092	1	0	0.43	0.978	0.979	0	0	0.165	0.008	0.895	1	0.756	0.039	0.96	0.982	0.288	1	0.53	0.121	0.09	0.72	0.46	0.152	0.342	0.856	0.353	0.185	0.971	0.889	0.273	0.191	0.029	0.004
ORF1ab	266	21555	beta	NC045512	SARS-CoV-2	0	1	0	0	1	0	0.011	0	1	0	0	1	0	0.999	1	0.034	0	0	0	0	1	1	0.997	0	1	1	0	1	0.903	0.017	0	1	1	0	0.579	0.998	0	0.364	1	0.855	0.444	0.004	0.328	0
HGI18 gp3	23757	27842	beta	NC046954	Rodent coronavirus isolate RtMruf	0	1	0.038	0.294	1	0.815	0.273	0	0.978	0	0.032	1	0.033	0.216	1	0.298	0	0.191	0.002	0.037	0.947	0.69	0.699	0.513	0.331	0.977	0.16	0.531	0.788	0.543	0.069	0.253	0.999	0.073	0.761	0.68	0.299	0.237	0.994	0.609	0.632	0.353	0.962	0.019
HGI18 gp1	211	21596	beta	NC046954	Rodent coronavirus isolate RtMruf	0	1	0	0.046	0.998	0.966	1	0	1	0	0	1	0.047	0.007	1	0.327	0	0.028	0	0	1	0.428	0.116	0	0.997	1	0.991	0.212	0	1	0.791	0.997	1	0	0.004	0.996	0.822	0.032	1	0.075	1	0.884	1	0.991
HGI18 gp4	28768	29016	beta	NC046954	Rodent coronavirus isolate RtMruf	0.861	0.532	0.035	0.281	0.397	0.997	0.475	0.002	0.136	0.017	0.64	0.939	0.234	0.114	0.563	0.745	0.675	0.625	0.027	0.043	0.852	0.048	0.528	0.299	0.613	0.381	0.288	0.393	0.333	0.642	0.559	0.402	0.245	0.324	0.234	0.204	0.862	0.414	0.322	0.527	0.136273	0.814815	0.228	0.437
HGI18 gp2	22459	23742	beta	NC046954	Rodent coronavirus isolate RtMruf	0.006	0.877	0.038	0.963	0.978	0.725	0.306	0.004	0.946	0.012	0.462	0.727	0.095	0.539	0.931	0.305	0.492	0.867	0.021	0.145	0.931	0.825	0.456	0.19	0.872	0.972	0.576	0.375	0.831	0.55	0.565	0.469	0.663	0.192	0.301	0.935	0.048	0.665	0.977	0.065	0.102	0.793	0.905	0.481
ORF3	24620	25339	beta	NC048212	Bat coronavirus isolate CMR704	0.006	0.992	0.065	0.48	0.324	0.465	0.991	0.018	0.99	0.003	0.008	0.945	0.29	0.403	0.659	0.439	0.043	0.474	0.284	0.03	0.861	0.237	0.652	0.296	0.781	0.71	0.067	0.481	0.273	0.26	0.526	0.685	0.282	0.493	0.533	0.607	0.594	0.237	0.787	0.695	0.311	0.34	0.59	0.005
ORF1a	210	12827	beta	NC048212	Bat coronavirus isolate CMR704	0	1	0	0.551	1	0.803	0.999	0	1	0	0	1	0	0.052	1	0.828	0	0.82	0	0	1	0.967	0.987	0.005	1	1	0	0.999	0.224	0.97	0.297	0.929	1	0	0.988	0.576	0.001	0.212	1	0.032	1	0.093	1	0.011
HO265 gp8	28278	28718	beta	NC048212	Bat coronavirus isolate CMR704	0.002	0.997	0.136	0.181	0.251	0.692	0.992	0.006	0.976	0.001	0.006	0.971	0.441	0.124	0.447	0.786	0.006	0.538	0.147	0.017	0.716	0.002	0.817	0.189	0.321	0.791	0.077	0.271	0.354	0.968	0.291	0.995	0.598	0.106	0.632	0.246	0.896	0.116	0.933	0.526	0.749	0.977	0.657	0.529
ORF1ab	210	20842	beta	NC048212	Bat coronavirus isolate CMR704	0	1	0	0.889	1	0.749	1	0	1	0	0	1	0	0.012	1	0.771	0	0.946	0	0	1	0.937	1	0	1	1	0.007	1	0.094	0.739	0.02	1	1	0	0.649	0.6	0.019	0.218	1	0	0.998	0.01	1	0.147
M	25568	26233	beta	NC048212	Bat coronavirus isolate CMR704	0.493	0.961	0.675	0.005	0.022	0.692	0.993	0.076	0.807	0.001	0.066	0.993	0.585	0.564	0.019	0.724	0.014	0.088	0.163	0.206	0.224	0.249	0.68	0.542	0.087	0.937	0.897	0.349	0.16	0.695	0.606	0.766	0.92	0.047	0.072	0.458	0.925	0.674	0.96	0.417	0.142	0.894	0.976	0.371
S	20814	24623	beta	NC048212	Bat coronavirus isolate CMR704	0	1	0	0.008	0.998	0.361	0.973	0	1	0	0.005	1	0.001	0.005	0.999	0.94	0	0.307	0.001	0.005	1	0.94	0.866	0.327	0.998	0.737	0.346	0.801	0.307	0.574	0.273	0.506	0.744	0.308	0.499	0.004	0.097	0.925	0.945	0.503	0.799	0.227	0.612	0.106
HO265 gp7	27726	28277	beta	NC048212	Bat coronavirus isolate CMR704	0.04	0.998	0.153	0.118	0.999	0.692	0.275	0	0.084	0	0.467	1	0.149	0.26	0.794	0.547	0.012	0.244	0.068	0.004	0.727	0.653	0.184	0.839	0.689	0.016	0.316	0.211	0.583	0.522	0.049	0.352	0.559	0.66	0.815	0.193	0.253	0.649	0.007	0.931	0.773	0.206	0.35	0.193
N	26302	27714	beta	NC048212	Bat coronavirus isolate CMR704	0	1	0.491	0.001	0.682	0	1	0.203	1	0	0.001	1	0.27	0.729	0.233	0.617	0	0.005	0.326	0.217	0.419	0.978	1	0.016	0.208	0.672	0.589	1	0.001	0.42	0.024	0.976	1	0.186	0.335	0.135	0.91	0.572	1	0.832	0.116	0.827	0.833	0.081
HO264 gp06	23930	27904	beta	NC048217	Murine hepatitis virus	0	1	0.012	0.848	0.399	0.985	1	0	1	0	0.001	1	0.756	0.543	0.63	0.112	0.027	0.445	0	0.028	0.984	0.012	1	0.024	0.691	0.93	0.933	0.976	0.015	0.128	0.001	0.041	0.911	0.959	0.422	0.908	0.582	0.183	1	0.96	0.172	0.202	0.977	0.64
HO264 gp10	211	13623	beta	NC048217	Murine hepatitis virus	0.023	1	0	0.195	0.007	1	1	0	0.997	0	0	1	0.912	0.979	0.805	0	0.006	0	0	0	1	0.041	0.981	0	0.301	1	0.936	0.08	0	0.985	0.169	0.978	1	0	0.006	1	0.529	0.032	1	0.474	0.992	0.658	1	0.179
HO264 gp09	211	21746	beta	NC048217	Murine hepatitis virus	0	1	0	0.082	0.002	1	1	0	1	0	0	1	0.988	0.779	0.87	0	0	0	0	0	1	0.009	1	0	0.35	1	0.999	0.11	0	0.94	0	0.967	1	0	0	1	0.914	0.002	1	0.825	0.994	0.423	0.999	0.437
HO264 gp04	28376	28714	beta	NC048217	Murine hepatitis virus	0.592	0.796	0.03	0.353	0.097	0.941	0.941	0.007	0.694	0.424	0.601	0.1	0.371	0.001	0.142	1	0.524	0.992	0.04	0.033	0.916	0.002	0.703	0.313	0.463	0.209	0.573	0.169	0.147	0.892	0.506	0.046	0.732	0.757	0.645	0.875	0.431	0.087	0.383	0.557	0.205411	0.945	0.315	0.937
HO264 gp08	21772	22557	beta	NC048217	Murine hepatitis virus	0.893	0.645	0.05	0.272	0.309	0.972	0.762	0.005	0.222	0	0.412	1	0.329	0.576	0.636	0.28	0.699	0.173	0.001	0.317	0.879	0.089	0.707	0.801	0.234	0.928	0.496	0.004	0.794	0.888	0.532	0.002	0.952	0.209	0.493	0.997	0.065	0.079	0.923	0.937	0.884	0.735	0.991	0.058
HO264 gp02	28969	29655	beta	NC048217	Murine hepatitis virus	0.293	0.37	0.09	0.861	0.933	0.918	0.82	0	0.646	0.166	0.011	0.949	0.038	0.345	0.922	0.584	0.797	0.881	0	0.057	0.842	0.518	0.746	0.067	0.411	0.927	0.037	0.529	0.033	0.883	0.242	0.967	0.963	0.027	0.455	0.672	0.403	0.371	0.969	0.172	0.954	0.363	0.825	0.672
HO264 gp07	22984	23922	beta	NC048217	Murine hepatitis virus	0.006	1	0.101	0.503	0.002	0.986	0.935	0.04	0.959	0	0.14	0.998	0.995	0.212	0.539	0.034	0.037	0.045	0.155	0.101	0.835	0.109	0.971	0.138	0.891	0.424	0.95	0.328	0.06	0.543	0.093	0.005	0.857	0.707	0.192	0.928	0.277	0.811	0.906	0.774	0.94	0.085	0.411	0.427
HO264 gp01	29670	31034	beta	NC048217	Murine hepatitis virus	0.586	0.985	0.377	0.005	0	0.996	1	0	0.981	0	0	1	0.818	0.87	0.054	0.197	0.025	0.001	0.002	0.103	0.535	0.125	1	0.346	0.001	0.074	0.739	0.408	0.497	0.439	0.104	0.998	0.612	0.214	0.001	0.906	0.986	0.317	0.949	0.974	0.089	0.685	0.952	0.121
HO264 gp03	28707	28958	beta	NC048217	Murine hepatitis virus	0.174	0.549	0.156	0.649	0.052	0.993	0.411	0.066	0.683	0.012	0.575	0.594	0.813	0.072	0.385	0.432	0.438	0.639	0.452	0.037	0.599	0.124	0.223	0.228	0.423	0.698	0.871	0.162	0.743	0.175	0.766	0.842	0.409	0.055	0.051	0.817	0.578	0.574	0.543	0.007	0.532663	0.132	0.397	0.855
HO264 gp05	28059	28379	beta	NC048217	Murine hepatitis virus	0.164	0.784	0.098	0.645	0.015	0.509	0.998	0.123	0.949	0.392	0.072	0.271	0.791	0.101	0.229	0.664	0.422	0.836	0.337	0.114	0.812	0.022	0.64	0.364	0.84	0.471	0.982	0.227	0.162	0.155	0.407	0.288	0.629	0.425	0.04	0.402	0.891	0.625	0.566	0.169	0.419	0.169	0.377	0.896
HGI18 gp6	29738	31093	beta	NC046954	Rodent coronavirus isolate RtMruf	0.392	0.989	0.669	0.002	0.484	0.145	0.98	0.077	0.823	0	0.036	1	0.126	0.988	0.096	0.334	0.007	0.003	0.058	0.384	0.256	0.854	0.804	0.324	0.001	1	0.006	0.886	0.703	0.858	0.336	0.924	0.846	0.007	0.823	0.756	0.927	0.006	0.998	0.771	0.704	0.76	0.995	0.198
HGI18 gp5	29032	29727	beta	NC046954	Rodent coronavirus isolate RtMruf	0	0.995	0.533	0.381	0.07	0.725	0.986	0.065	1	0.001	0.003	0.756	0.659	0.093	0.43	0.679	0.004	0.596	0.262	0.076	0.348	0.258	0.805	0.048	0.242	0.996	0.423	0.353	0.216	0.553	0.413	0.939	0.988	0.003	0.082	0.74	0.596	0.658	0.999	0.001	0.516	0.495	0.757	0.546
NS7a	25355	25726	delta	NC011547	Bulbul coronavirus HKU11	0.393	0.996	0.285	0.003	0.593	0.274	0.384	0.484	0.604	0	0.56	0.999	0.135	0.716	0.424	0.394	0.007	0.001	0.112	0.777	0.552	0.992	0.735	0.466	0.743	0.904	0.196	0.994	0.285	0.155	0.339	0	0.126	0.129	0.833	0.006	0.414	0.922	0.823	0.469	0.228	0.195	0.56	0.149
orf1ab	607	19400	delta	NC011547	Bulbul coronavirus HKU11	0	1	0	0	1	0.045	0.993	0	0.997	0	0.01	1	0	0.33	1	0.842	0	0	0	0	1	1	0.967	0	1	1	0.017	1	0.013	0.987	0	0.579	1	0.007	0.997	1	0.045	0	1	0.997	0.968	0.866	0.865	0
NS7c	25983	26267	delta	NC011547	Bulbul coronavirus HKU11	0.41	0.851	0.004	0.745	0.771	0.191	0.877	0.08	0.802	0	0.853	0.403	0.014	0.867	0.357	0.599	0.709	0.814	0	0.757	0.986	0.492	0.96	0.078	0.89	0.197	0.155	0.82	0.11	0.846	0.161	0.973	0.114	0.728	0.644	0.494	0.959	0.058	0.766	0.89	0.977	0.656	0.275	0.53
E	22873	23121	delta	NC011547	Bulbul coronavirus HKU11	0.002	0.512	0.058	0.982	0.964	0.627	0.747	0	0.908	0.011	0.343	0.575	0.057	0.783	0.527	0.408	0.635	0.986	0.006	0.013	0.816	0.233	0.253	0.614	0.704	0.636	0.197	0.343	0.149	0.705	0.508	0.776	0.21	0.177	0.964	0.218	0.584	0.12	0.378	0.333	0.684	0.476	0.45	0.407
N	24127	25176	delta	NC011547	Bulbul coronavirus HKU11	0	1	1	0	0.861	0.046	0.466	0.607	1	0	0.005	1	0.167	0.789	0.091	0.706	0	0.001	0.5	0.566	0	0.994	1	0.283	0.001	0.939	0.18	0.392	0.686	0.691	0.001	0.998	1	0.307	0.732	0.81	0.632	0.12	1	0.993	0.567	0.633	0.941	0.011
S	19382	22879	delta	NC011547	Bulbul coronavirus HKU11	0	1	0	0.007	1	0.015	0.464	0.006	0.894	0	0.31	1	0.012	0.227	1	0.44	0	0.008	0.093	0.038	1	1	0.743	0.152	0.984	0.803	0.137	0.815	0.285	0.627	0.011	0	0.752	0.678	0.837	0.999	0.223	0	0.903	0.994	0.914	0.191	0.063	0.001
NS7b	25732	25986	delta	NC011547	Bulbul coronavirus HKU11	0.333	0.957	0.205	0.098	0.374	0.435	0.422	0.41	0.504	0	0.099	0.991	0.432	0.346	0.873	0.076	0.091	0.014	0.376	0.394	0.622	0.366	0.603	0.214	0.032	1	0.274	0.572	0.641	0.373	0.336	0.965	0.825	0.027	0.533	0.583	0.198	0.588	0.998	0.103	0.297	0.452	0.983	0.435
NS6	23819	24106	delta	NC011547	Bulbul coronavirus HKU11	0.04	0.998	0.073	0.108	0.528	0.106	0.968	0.042	0.458	0.026	0.276	0.854	0.83	0.02	0.108	0.856	0.003	0.405	0.572	0.005	0.753	0.38	0.063	0.352	0.383	0.997	0.837	0.604	0.599	0.085	0.6	0	0.346	0.56	0.569	0.957	0.588	0.166	0.956	0.171	0.539	0.008	0.86	0.205
M	23118	23819	delta	NC011547	Bulbul coronavirus HKU11	0.001	1	0.029	0.366	0.975	0.265	0.875	0.003	0.999	0	0.317	0.749	0.021	0.286	0.658	0.934	0.003	0.862	0.024	0.152	0.942	0.686	0.842	0.152	0.813	0.673	0.059	0.971	0.259	0.02	0.121	0.999	0.283	0.18	0.995	0.052	0.4	0.36	0.887	0.096	0.017	0.19	0.231	0.122
NS7b	25632	25883	delta	NC011549	Thrush coronavirus HKU12	0.226	0.929	0.127	0.288	0.174	0.901	0.819	0.029	0.627	0	0.509	0.872	0.683	0.156	0.213	0.612	0.15	0.451	0.216	0.052	0.694	0.074	0.833	0.194	0.65	0.281	0.833	0.001	0.482	0.678	0.117	0.977	0.302	0.471	0.699	0.908	0.02	0.247	0.559	0.501	0.47	0.605	0.397	0.723
M	23246	23899	delta	NC011549	Thrush coronavirus HKU12	0	0.987	0.421	0.563	0.778	0.815	0.851	0.003	1	0	0.105	0.821	0.068	0.441	0.363	0.841	0.01	0.88	0.074	0.024	0.433	0.272	0.97	0.036	0.271	0.74	0.338	0.979	0.066	0.272	0.091	0.997	0.307	0.565	0.396	0.138	0.977	0.481	0.976	0.163	0.199	0.478	0.413	0.93
orf1ab	592	19451	delta	NC011549	Thrush coronavirus HKU12	0.002	1	0	0	1	0.931	0.76	0	0.946	0	0.001	1	0	0.214	1	0.534	0	0	0	0	1	1	0.989	0	1	1	0.289	0.862	0.218	0.978	0.001	1	0.994	0	0.213	1	0.002	0	1	0.639	1	0.094	0.203	0.032
S	19433	23011	delta	NC011549	Thrush coronavirus HKU12	0.012	1	0.015	0	0.999	0.348	0.998	0	0.928	0	0.191	1	0.005	0.196	0.297	0.999	0	0.028	0	0.001	0.979	0.936	0.982	0.006	0.683	0.998	0.032	0.934	0.094	0.921	0.008	0.992	0.969	0.017	0.732	0.957	0.15	0.062	1	0.982	0.673	0.852	0.406	0.003
NS7c	25940	26173	delta	NC011549	Thrush coronavirus HKU12	0.003	0.993	0.202	0.464	0.933	0.095	0.864	0.061	0.922	0.065	0.202	0.389	0.107	0.33	0.28	0.867	0.023	0.864	0.155	0.109	0.599	0.754	0.647	0.007	0.855	0.731	0.666	0.87	0.087	0.852	0.125	0.681	0.638	0.771	0.492	0.817	0.582	0.194	0.968	0.683	0.887	0.224	0.373	0.728
NS7a	25255	25626	delta	NC011549	Thrush coronavirus HKU12	0.339	0.898	0.737	0.013	0.984	0.167	0.073	0.215	0.311	0	0.245	0.997	0.015	0.875	0.603	0.349	0.017	0.027	0.056	0.649	0.114	0.942	0.478	0.104	0.193	0.981	0.034	0.891	0.666	0.822	0.246	0.131	0.392	0.147	0.963	0.742	0.772	0.011	0.848	0.893	0.711	0.69	0.504	0.177
E	23005	23253	delta	NC011549	Thrush coronavirus HKU12	0.01	0.966	0.096	0.446	0.965	0.154	0.263	0.145	0.854	0	0.675	0.776	0.047	0.818	0.534	0.383	0.064	0.443	0.154	0.294	0.711	0.951	0.57	0.739	0.014	0.885	0.175	0.349	0.602	0.652	0.283	0	0.632	0.441	0.992	0.514	0.166	0.027	0.915	0.738	0.216	0.884	0.968	0.116
NS6	23899	24174	delta	NC011549	Thrush coronavirus HKU12	0.1	0.997	0.613	0.003	0.459	0.382	0.773	0.137	0.208	0.003	0.854	0.905	0.906	0.043	0.005	0.939	0	0.244	0.215	0.211	0.179	0.398	0.38	0.074	0.196	0.987	0.804	0.915	0.276	0.553	0.161	0.82	0.157	0.684	0.713	0.701	0.984	0.042	0.949	0.598	0.126126	0.786	0.41	0.905
N	24192	25223	delta	NC011549	Thrush coronavirus HKU12	0.01	1	0.77	0	0.427	0.207	0.667	0.619	1	0	0.004	0.996	0.064	0.336	0.774	0.77	0	0.001	0.12	0.929	0.159	0.709	0.998	0.032	0.036	0.997	0.051	0.845	0.661	0.527	0.086	0.775	0.998	0.266	0.674	0.815	0.291	0.118	1	0.942	0.33	0.565	0.759	0.03
NS7c	26048	26329	delta	NC011550	Munia coronavirus HKU13	0	0.973	0.691	0.488	0.658	0.562	0.87	0.015	0.924	0.001	0.3	0.783	0.728	0.366	0.011	0.751	0.004	0.796	0.038	0.114	0.154	0.28	0.944	0.442	0.154	0.23	0.66	0.21	0.022	0.625	0.011	0.991	0.626	0.535	0.388	0.062	0.995	0.312	0.85	0.659	0.897	0.117	0.802	0.93
S	19499	22969	delta	NC011550	Munia coronavirus HKU13	0	1	0	0.011	0.818	0.354	1	0	1	0	0.459	1	0.381	0.339	0.075	0.941	0	0.348	0.001	0.003	1	0.714	0.998	0.092	0.988	0.762	0.492	0.102	0.003	1	0.008	0	0.724	0.977	0.884	0.994	0.872	0	0.999	1	1	0.904	0.813	0.498
orf1ab	595	19517	delta	NC011550	Munia coronavirus HKU13	0	1	0	0.113	1	0.144	1	0	1	0	0	1	0	0.996	0.997	0.589	0	0.212	0	0	1	0.998	1	0	1	0.995	0.02	0.762	0	1	0	0.98	1	0.784	0.99	1	0.059	0	1	1	1	1	0.84	0.006
N	24326	25384	delta	NC011550	Munia coronavirus HKU13	0	1	0.72	0.012	0.834	0.022	0.996	0.048	1	0	0.002	1	0.073	0.994	0.106	0.269	0	0.018	0.018	0.482	0.194	0.98	0.996	0.292	0.039	0.133	0.055	0.982	0.022	0.883	0.091	0.081	0.993	0.707	0.941	0.863	0.743	0.009	0.954	1	0.262	0.923	0.799	0.044
M	23204	23860	delta	NC011550	Munia coronavirus HKU13	0.038	0.995	0.241	0.144	0.886	0.271	0.674	0.094	0.717	0	0.744	0.974	0.233	0.664	0.171	0.627	0.018	0.274	0.113	0.305	0.643	0.946	0.707	0.602	0.585	0.375	0.27	0.532	0.171	0.845	0.101	0.52	0.4	0.739	0.583	0.549	0.663	0.308	0.532	0.977	0.885	0.465	0.526	0.397
NS6	23860	24186	delta	NC011550	Munia coronavirus HKU13	0.213	1	0.091	0.006	0.262	0.004	0.997	0.541	0.743	0.026	0.583	0.617	0.47	0.672	0.001	0.857	0.004	0.225	0.673	0.302	0.752	0.945	0.898	0.108	0.373	0.582	0.336	0.982	0.154	0.806	0.144	0.218	0.407	0.903	0.713	0.719	0.968	0.037	0.829	0.976	0.232	0.941	0.24	0.375
NS7a	25417	25788	delta	NC011550	Munia coronavirus HKU13	0.051	0.957	0.146	0.443	0.963	0.796	0.731	0	0.6	0.003	0.029	0.999	0.056	0.27	0.823	0.736	0.089	0.704	0.053	0	0.707	0.076	0.884	0.209	0.642	0.146	0.062	0.2	0.899	0.79	0.05	0.243	0.881	0.468	0.877	0.982	0	0.196	0.593	0.805	0.8	0.533	0.325	0.002
E	22963	23211	delta	NC011550	Munia coronavirus HKU13	0.7	0.326	0.092	0.417	0.837	0.174	0.307	0.34	0.663	0.066	0.118	0.755	0.008	0.939	0.793	0.231	0.638	0.229	0.501	0.178	0.614	0.709	0.912	0.211	0.486	0.158	0.105	0.323	0.591	0.759	0.199	0.037	0.326	0.936	0.985	0.864	0.137	0.004	0.571	0.995	0.487	0.833	0.27	0.105
NS7b	25794	26051	delta	NC011550	Munia coronavirus HKU13	0.37	0.992	0.087	0.036	0.965	0.206	0.297	0.022	0.296	0.004	0.105	0.993	0.046	0.191	0.946	0.758	0.03	0.121	0.107	0.076	0.758	0.775	0.532	0.43	0.471	0.632	0.275	0.705	0.784	0.682	0.334	0.833	0.691	0.193	0.751	0.341	0.109	0.521	0.725	0.175	0.42	0.565	0.541	0.267
E	22912	23160	delta	NC016991	White eye coronavirus HKU16	0.252	0.405	0	0.928	0.807	0.887	0	0.073	0.802	0.002	0.192	0.808	0.027	0.665	1	0.041	0.869	0.498	0.083	0.274	0.978	0.533	0.188	0.58	0.837	0.848	0.787	0.088	0.742	0.155	0.822	0.111	0.416	0.143	0.056	0.882	0.016	0.759	0.709	0.162	0.112	0.43	0.813	0.209
orf1ab	511	19397	delta	NC016991	White eye coronavirus HKU16	0	1	0	0.007	1	0.01	0.999	0	1	0	0.001	1	0	1	1	0	0	0	0	0	1	1	1	0	1	1	0.042	0.981	0.164	0.981	0	0.974	1	0.091	0.969	0.999	0.003	0	1	1	0.999	0.294	0.997	0
M	23153	23809	delta	NC016991	White eye coronavirus HKU16	0.005	1	0.064	0.072	0.506	0.174	0.763	0.428	0.994	0	0.082	0.969	0.244	0.325	0.922	0.321	0.002	0.066	0.109	0.793	0.878	0.648	0.897	0.266	0.145	0.965	0.007	0.466	0.661	0.869	0.176	1	0.863	0.013	0.991	0.059	0.455	0.126	0.994	0.842	0.889	0.527	0.858	0.366
S	19379	22918	delta	NC016991	White eye coronavirus HKU16	0	1	0.028	0.149	1	0.587	0.873	0	0.993	0	0.22	1	0.104	0.875	0.859	0.175	0	0.048	0.002	0.003	0.958	0.985	0.965	0.43	0.639	0.437	0.436	0.434	0.121	0.816	0	0.033	0.991	0.515	0.734	0.954	0.582	0.013	0.895	1	0.957	0.246	0.676	0.001
NS6	23809	24090	delta	NC016991	White eye coronavirus HKU16	0.084	0.991	0.129	0.165	0.971	0.004	0.769	0.171	0.149	0.04	0.293	0.975	0.186	0.782	0.307	0.312	0.031	0.151	0.785	0.03	0.676	0.942	0.49	0.175	0.394	0.815	0.353	0.976	0.608	0.754	0.083	0.159	0.311	0.869	0.965	0.482	0.692	0.01	0.85	0.929	0.844	0.611	0.622	0.278
NS7a	24143	24811	delta	NC016991	White eye coronavirus HKU16	0.952	0.998	0.006	0.007	0	0.597	0.941	0.79	0.413	0.002	0.98	0.635	0.899	0.019	0.111	0.894	0.242	0.084	0.357	0.902	0.991	0.049	0.951	0.002	0.712	0.246	0.204	0.562	0.379	0.723	0.142	1	0.323	0.01	0.015	0.955	0.731	0.557	0.935	0.214	0.72	0.571	0.2	0.096
N	24115	25158	delta	NC016991	White eye coronavirus HKU16	0.001	1	0.422	0.001	0.583	0.583	0.683	0.095	0.999	0	0.066	1	0.239	0.065	0.773	0.869	0	0.023	0.171	0.246	0.489	0.467	1	0.105	0.09	0.734	0.127	0.585	0.678	0.578	0.008	0.977	0.99	0.19	0.568	0.336	0.013	0.835	1	0.798	0.151	0.87	0.805	0.058
NS7b	25139	25270	delta	NC016991	White eye coronavirus HKU16	0.659	0.015	0.035	0.957	0.613	0.809	0.451	0.014	0.102	0.083	0.693	0.744	0.157	0.891	0.504	0.046	0.992	0.763	0.623	0	0.856	0.3	0.071	0.761	0.745	0.253	0.023	0.348	0.414	0.339	0.846	0.275	0.373184	0.116	0.144	0.517	0	0.853	0.097	0.059	0.153	0	0.126	0.007
S	19334	22954	delta	NC016992	Sparrow coronavirus HKU17	0	1	0.004	0	1	0.002	0.923	0.017	0.961	0	0.01	1	0.006	0.765	0.998	0.226	0	0	0.052	0.088	0.993	1	0.956	0.177	0.499	0.587	0.215	0.995	0.591	0.011	0.001	0.004	0.944	0.871	0.809	0.823	0.373	0.042	0.918	1	0.091	0.049	0.172	0
NS6	23842	24129	delta	NC016992	Sparrow coronavirus HKU17	0.452	1	0.563	0	0.477	0.007	0.855	0.654	0.484	0.002	0.372	0.967	0.254	0.713	0.038	0.818	0	0.007	0.581	0.521	0.238	0.974	0.155	0.205	0.265	0.969	0.067	0.971	0.444	0.973	0.811	0.894	0.048	0.393	0.891	0.511	0.675	0.013	0.709	0.948	0.620621	0.963	0.464	0.489
NS7c	25539	25751	delta	NC016992	Sparrow coronavirus HKU17	0.317	0.797	0.15	0.297	0.74	0.252	0.554	0.184	0.56	0.162	0.217	0.689	0.056	0.393	0.66	0.621	0.265	0.471	0.156	0.4	0.65	0.63	0.965	0.023	0.295	0.517	0.161	0.903	0.623	0.881	0.088	0.269	0.556	0.961	0.948	0.905	0.621	0	0.916	0.985	0.297	0.976	0.434	0.331
orf1ab	520	19352	delta	NC016992	Sparrow coronavirus HKU17	0	1	0.049	0	1	0	0.848	0	1	0	0.009	1	0	1	0.999	0.087	0	0	0	0.003	0.944	1	1	0	0.029	1	0	1	0.095	0.825	0	0.999	1	0.243	1	0.993	0.531	0	1	1	0.81	0.506	0.697	0
M	23189	23842	delta	NC016992	Sparrow coronavirus HKU17	0.005	1	0.067	0.063	0.994	0.005	0.931	0.04	0.973	0	0.08	0.995	0.003	0.812	0.721	0.702	0	0.233	0.01	0.484	0.855	0.897	0.8	0.016	0.744	0.962	0.826	0.849	0.033	0.718	0.375	0.918	0.795	0.125	0.698	0.475	0.884	0.103	0.988	0.611	0.826	0.429	0.303	0.841
N	24150	25178	delta	NC016992	Sparrow coronavirus HKU17	0.046	1	0.573	0	0.501	0.002	0.712	0.957	0.986	0	0.07	1	0.106	0.993	0.609	0.008	0	0	0.513	0.973	0.341	1	0.996	0.526	0.016	0.153	0.077	0.858	0.026	0.648	0.086	0.491	0.999	0.103	0.715	0.369	0.796	0.491	0.927	1	0.485	0.694	0.951	0.038
NS7b	25189	25623	delta	NC016992	Sparrow coronavirus HKU17	0.144	0.841	0.232	0.383	0.842	0.046	0.432	0.612	0.898	0.055	0.851	0.083	0.019	0.913	0.234	0.729	0.176	0.646	0.069	0.98	0.613	0.941	0.929	0.236	0.065	0.553	0.227	0.468	0.781	0.611	0.189	0.954	0.259	0.45	0.537	0.243	0.969	0.077	0.913	0.56	0.853	0.268	0.726	0.7
E	22948	23196	delta	NC016992	Sparrow coronavirus HKU17	0.232	0.167	0	0.963	0.971	0.925	0.07	0.002	0.651	0.002	0.497	0.925	0.002	0.885	0.967	0.151	0.927	0.802	0.026	0.008	0.951	0.093	0.971	0.865	0.659	0.002	0.042	0.094	0.535	0.568	0.024	0.876	0.517	0.588	0.691	0.379	0.113	0.558	0.058	0.829	0.198	0.91	0.209	0.007
NS7a	24244	24846	delta	NC016992	Sparrow coronavirus HKU17	0.784	0.987	0.008	0.044	0.228	0.137	0.478	0.931	0.214	0.03	0.993	0.284	0.466	0.485	0.186	0.609	0.298	0.114	0.584	0.896	0.976	0.808	0.985	0.003	0.467	0.508	0.831	0.991	0.391	0.037	0.014	0.999	0.341	0.107	0.536	0.248	0.342	0.782	0.987	0.017	0.556	0.034	0.398	0.546
NS7b	25561	25932	delta	NC016993	Magpie robin coronavirus HKU18	0.011	1	0.271	0.003	0.182	0.349	0.992	0.033	0.545	0	0.134	1	0.989	0.379	0.022	0.251	0	0.009	0.052	0.268	0.528	0.487	0.003	0.226	0.947	0.595	0.812	0.817	0.131	0.459	0.569	0.002	0.672	0.585	0.42	0.338	0.876	0.237	0.035	0.993	0.636	0.218	0.071	0.384
orf1ab	596	19356	delta	NC016993	Magpie robin coronavirus HKU18	0	1	0	0.319	0.996	0.003	1	0	1	0	0.028	1	0.246	1	0.131	0	0	0	0	0.024	1	1	1	0	0.968	0.955	0.865	0.979	0	0.83	0	0.302	1	0.993	0.831	1	0.615	0	1	1	0.989	0.116	0.998	0
M	23226	23882	delta	NC016993	Magpie robin coronavirus HKU18	0.08	0.98	0.089	0.316	0.114	0.265	0.999	0.164	0.983	0	0.308	0.931	0.406	0.888	0.037	0.372	0.091	0.282	0.15	0.382	0.846	0.52	0.993	0.141	0.514	0.239	0.721	0.194	0.174	0.797	0.081	0.797	0.054	0.961	0.272	0.843	1	0.001	0.831	0.989	0.145	0.927	0.424	0.893
E	22985	23233	delta	NC016993	Magpie robin coronavirus HKU18	0.466	0.766	0	0.296	0.404	0.525	0.605	0.222	0.922	0.001	0.192	0.905	0.033	0.84	0.681	0.317	0.339	0.228	0.076	0.66	0.893	0.794	0.924	0.537	0.515	0.064	0.186	0.195	0.332	0.796	0.199	0.777	0.306	0.551	0.681	0.497	0.255	0.351	0.361	0.955	0.248	0.861	0.389	0.442
NS7a	25407	25580	delta	NC016993	Magpie robin coronavirus HKU18	0.152	0.983	0	0.038	0.363	0.523	0.675	0.216	0.26	0.02	0.903	0.733	0.626	0.139	0.072	0.787	0.028	0.383	0.185	0.36	0.79	0.573	0.072	0.301	0.92	0.568	0.68	0.567	0.029	0.706	0.651	0.746	0.057	0.438	0.118	0.807	0.837	0.334	0.101	0.618	0.714	0.462	0.101	0.712
S	19338	22991	delta	NC016993	Magpie robin coronavirus HKU18	0	1	0	0.598	0.629	0.703	0.992	0.001	1	0	0.609	0.997	0.713	0.368	0.455	0.407	0	0.484	0.12	0.009	0.999	0.946	1	0.49	0.886	0	0.231	0.424	0.053	0.572	0.003	0.001	0.77	1	0.331	1	0.258	0.004	0.459	1	0.589	0.547	0.481	0
NS6	23882	24172	delta	NC016993	Magpie robin coronavirus HKU18	0.03	0.981	0.044	0.414	0.048	0.121	0.997	0.272	0.724	0	0.646	0.815	0.976	0.823	0	0.215	0.079	0.255	0.566	0.112	0.815	0.446	0.809	0.027	0.51	0.6	0.014	0.974	0.214	0.504	0.134	0.964	0.529	0.405	0.568	0.154	0.933	0.476	0.885	0.41	0.211	0.782	0.268	0.277
N	24355	25395	delta	NC016993	Magpie robin coronavirus HKU18	0	1	0.671	0.008	0.161	0.13	0.924	0.643	0.997	0	0.296	0.953	0.889	0.626	0.022	0.409	0	0.02	0.344	0.767	0.234	0.906	1	0.164	0.003	0.867	0.832	0.618	0.169	0.4	0.064	0.098	0.985	0.901	0.345	0.942	0.864	0.064	1	0.985	0.711	0.196	0.994	0.137
NS7c	25941	26195	delta	NC016993	Magpie robin coronavirus HKU18	0.011	0.989	0.125	0.512	0.71	0.155	0.368	0.388	0.945	0	0.339	0.831	0.392	0.631	0.772	0.061	0.033	0.147	0.622	0.168	0.734	0.805	0.994	0.423	0.472	0.311	0.257	0.491	0.64	0.351	0.034	0.86	0.804	0.728	0.639	0.393	0.153	0.774	0.859	0.379	0.553	0.213	0.75	0.126
orf1ab	482	19323	delta	NC016994	Night heron coronavirus HKU19	0	1	0	0.001	1	0	0.529	0	1	0	0	1	0	1	1	0	0	0	0.051	0	1	1	1	0	1	0.993	0.026	1	0.515	0.001	0	0.955	1	0.041	0.669	0.997	0	0.417	1	0.998	0.01	0.21	0.159	0
NS6	23960	24238	delta	NC016994	Night heron coronavirus HKU19	0.561	0.844	0.063	0.134	0.858	0.129	0.878	0.053	0.703	0.019	0	0.956	0.008	0.823	0.604	0.675	0.264	0.378	0.01	0.414	0.821	0.592	0.545	0.11	0.183	0.872	0.002	0.658	0.667	0.994	0.711	0.102	0.43	0.359	0.986	0.771	0.438	0.008	0.869	0.986	0.968	0.87	0.469	0.304
E	23069	23317	delta	NC016994	Night heron coronavirus HKU19	0.007	0.628	0.555	0.704	0.949	0.012	0.433	0.415	0.856	0.189	0.234	0.252	0.094	0.928	0.269	0.285	0.186	0.532	0.218	0.625	0.191	0.9	0.433	0.261	0.536	0.441	0.09	0.898	0.319	0.679	0.218	0.58	0.294	0.482	0.901	0.3	0.422	0.212	0.456	0.827	0.655311	0.551	0.284	0.144
S	19305	23069	delta	NC016994	Night heron coronavirus HKU19	0.004	1	0.005	0.021	0.854	0.242	0.988	0.008	1	0	0.001	1	0.003	0.968	0.99	0.079	0	0.002	0.096	0.05	0.993	0.984	0.989	0.241	0.46	0.981	0.407	0.673	0.195	0.626	0.078	0.03	0.966	0.135	0.054	0.989	0.515	0.145	1	0.958	0.503	0.677	0.944	0.011
N	24248	25276	delta	NC016994	Night heron coronavirus HKU19	0	1	0.998	0.013	0.997	0	0.384	0.475	0.999	0	0.01	0.986	0.14	0.944	0.163	0.415	0	0.032	0.674	0.238	0.002	1	0.775	0.681	0.191	0.546	0.024	0.991	0.42	0.339	0.007	0.919	0.999	0.298	0.999	0.065	0.352	0.274	0.753	0.962	0.239	0.586	0.715	0.021
M	23310	23960	delta	NC016994	Night heron coronavirus HKU19	0.042	1	0.448	0.002	0.767	0.019	0.341	0.84	1	0	0.015	0.965	0	0.818	0.967	0.42	0	0.01	0.888	0.453	0.402	0.99	0.908	0.176	0.295	0.279	0.157	0.999	0.64	0.242	0.254	0.996	0.372	0.178	0.327	0.075	0.724	0.857	0.696	0.156	0.108	0.608	0.177	0.293
NS7a	25277	25573	delta	NC016994	Night heron coronavirus HKU19	0.622	0.982	0.275	0.003	0.867	0.056	0.328	0.346	0.553	0	0.224	0.97	0.009	0.602	0.624	0.788	0.013	0.038	0.301	0.462	0.465	0.923	0.692	0.848	0.835	0.422	0.181	0.575	0.653	0.229	0.463	0.882	0.17	0.138	0.639	0.363	0.171	0.741	0.345	0.958	0.31	0.254	0.437	0.012
NS7b	25583	25876	delta	NC016994	Night heron coronavirus HKU19	0.028	0.855	0.064	0.757	0.828	0.182	0.372	0.313	0.947	0.116	0.391	0.095	0.077	0.433	0.811	0.527	0.244	0.783	0.245	0.401	0.808	0.673	0.99	0.619	0.596	0.048	0.47	0.247	0.41	0.2	0.015	0.96	0.309	0.613	0.608	0.332	0.097	0.74	0.224	0.34	0.122	0.478	0.22	0.143
NS7d	25752	25952	delta	NC016995	Wigeon coronavirus HKU20	0.269	0.346	0.383	0.606	0.146	0.866	0.182	0.314	0.628	0.015	0.599	0.622	0.578	0.509	0.395	0.192	0.484	0.371	0.225	0.427	0.343	0.253	0.958	0.621	0.563	0.098	0.323	0.771	0.588	0.144	0.051	0.472	0.378	0.907	0.351	0.345	0.339	0.703	0.614	0.879	0.632	0.026	0.77	0.245
S	18817	22455	delta	NC016995	Wigeon coronavirus HKU20	0.001	1	0	0.924	0.948	0.792	0.998	0	1	0	0.489	1	0.013	0.516	1	0.254	0.184	0.739	0.214	0	1	0.69	0.933	0.166	1	0.768	0.523	0.032	0.158	0.994	0.198	0.479	0.087	0.678	0.481	0.993	0.298	0.02	0.971	0.997	0.992	0.895	0.757	0.182
M	22708	23358	delta	NC016995	Wigeon coronavirus HKU20	0.031	1	0.005	0.046	0.674	0.713	0.961	0	0.576	0	0.616	1	0.694	0.201	0.242	0.674	0.003	0.176	0.094	0.016	0.972	0.438	0.79	0.236	0.587	0.689	0.341	0.612	0.001	0.815	0.046	0.397	0.724	0.217	0.798	0.342	0.815	0.161	0.866	0.697	0.524	0.859	0.36	0.684
NS7b	25218	25466	delta	NC016995	Wigeon coronavirus HKU20	0.329	0.879	0.111	0.15	0.901	0.188	0.66	0.071	0.579	0.059	0.905	0.354	0.03	0.568	0.037	0.949	0.105	0.818	0.048	0.402	0.54	0.774	0.903	0.83	0.157	0.007	0.011	0.872	0.632	0.802	0.066	0.816	0.332	0.671	0.837	0.071	0.642	0.601	0.112	0.684	0.065	0.925	0.428	0.372
NS6	23358	23630	delta	NC016995	Wigeon coronavirus HKU20	0.036	0.991	0.001	0.525	0.996	0.129	0.177	0.023	0.611	0	0.814	0.733	0.008	0.546	0.855	0.591	0.147	0.685	0.294	0.02	0.976	0.992	0.892	0.28	0.306	0.561	0.29	0.557	0.927	0.778	0.081	0.346	0.284	0.748	0.499	0.479	0.775	0.063	0.918	0.639	0.283	0.909	0.708	0.126
E	22455	22715	delta	NC016995	Wigeon coronavirus HKU20	0.749	0.156	0.283	0.497	0.381	0.175	0.621	0.473	0.745	0.883	0.06	0.055	0.061	0.441	0.535	0.758	0.745	0.805	0.104	0.843	0.468	0.228	0.849	0.975	0.071	0.226	0.312	0.694	0.168	0.747	0.336	0.068	0.8	0.964	0.317	0.261	0.623	0.668	0.467	0.755	0.49	0.645	0.974	0.391
orf1ab	219	18838	delta	NC016995	Wigeon coronavirus HKU20	0	1	0	1	1	0.033	1	0	1	0	0.017	1	0	1	1	0	0.347	0	0.01	0	1	1	0.943	0	1	1	0.797	0.957	0	0.51	0.046	1	0.903	0	0.097	1	0.003	0.429	1	0.162	0.914	0.09	1	0
NS7a	24695	24928	delta	NC016995	Wigeon coronavirus HKU20	0.053	0.887	0.519	0.17	0.463	0.475	0.633	0.176	0.938	0	0.17	0.879	0.133	0.742	0.24	0.454	0.038	0.232	0.622	0.053	0.209	0.627	0.075	0.555	0.014	0.87	0.312	0.848	0.314	0.456	0.619	0.058	0.339	0.223	0.103	0.207	0.764	0.703	0.674	0.093	0.439	0.497	0.875	0.211
N	23646	24698	delta	NC016995	Wigeon coronavirus HKU20	0.02	1	0.025	0.016	0.961	0.002	0.984	0.073	0.877	0	0.054	1	0.057	0.988	0.715	0.014	0	0	0.039	0.422	0.957	0.993	0.969	0.01	0.697	0.999	0.023	0.976	0.208	0.385	0.093	0.997	1	0.012	0.976	0.658	0.042	0.54	1	0.54	0.885	0.079	0.737	0.001
NS7c	25450	25716	delta	NC016995	Wigeon coronavirus HKU20	0.02	0.891	0.116	0.688	0.605	0.186	0.703	0.319	0.997	0.004	0.076	0.408	0.021	0.864	0.652	0.38	0.168	0.548	0.294	0.384	0.696	0.986	0.275	0.577	0.582	0.528	0.865	0.569	0.298	0.207	0.464	0.25	0.155	0.649	0.196	0.567	0.437	0.448	0.411	0.319	0.166	0.426	0.586	0.36
NS7c	25500	25916	delta	NC016996	Common moorhen coronavirus HKU21	0.04	0.981	0.942	0.006	0.879	0.088	0.123	0.552	0.859	0	0.333	0.954	0.117	0.859	0.148	0.574	0	0.04	0.546	0.396	0.022	0.953	0.893	0.183	0.5	0.881	0.049	0.792	0.706	0.545	0.139	0.983	0.255	0.143	0.981	0.335	0.622	0.142	0.972	0.836	0.751	0.203	0.55	0.066
orf1ab	478	19103	delta	NC016996	Common moorhen coronavirus HKU21	0	1	0	0.97	1	0.998	0.995	0	1	0	0	1	0	0.23	1	0.058	0	0.659	0	0	1	0.997	1	0	1	1	0.107	0.651	0.007	1	0	1	0.999	0	0.607	0.903	0.002	0.3	1	0.208	1	1	1	0.68
S	19085	22729	delta	NC016996	Common moorhen coronavirus HKU21	0	1	0.005	1	0.936	0.998	0.967	0	1	0	0.025	0.223	0.125	0.004	0.986	0.905	0.071	1	0	0	0.995	0.029	0.999	0.019	0.946	0.765	0.527	0.313	0.038	1	0.001	0.336	0.983	0.98	0.332	0.954	0.193	0.103	1	0.896	0.993	1	0.865	0.997
NS6	23779	24024	delta	NC016996	Common moorhen coronavirus HKU21	0.003	0.898	0.016	0.857	0.982	0.36	0.92	0	0.889	0	0.292	0.733	0.04	0.511	0.439	0.723	0.292	0.961	0.008	0	0.93	0.639	0.995	0.039	0.553	0.281	0.239	0.752	0.287	0.99	0.004	0.748	0.691	0.815	0.283	0.918	0.354	0.124	0.877	0.825	0.897	0.883	0.249	0.644
NS7b	25391	25576	delta	NC016996	Common moorhen coronavirus HKU21	0.016	0.48	0.669	0.679	0.424	0.639	0.269	0.143	0.646	0.123	0.777	0.18	0.647	0.368	0.034	0.58	0.147	0.769	0.377	0.148	0.072	0.083	0.104	0.245	0.205	0.966	0.458	0	0.556	0.955	0.164	0.472	0.178	0.531	0.929	0.915	0.22	0.01	0.988	0.861	0.743	0.723	0.967	0.957
NS7a	25107	25379	delta	NC016996	Common moorhen coronavirus HKU21	0.028	0.749	0.632	0.482	0.858	0.86	0.041	0.038	0.913	0.049	0.138	0.458	0.096	0.077	0.831	0.816	0.1	0.832	0.379	0.023	0.179	0.468	0.94	0.505	0.082	0.818	0.078	0.767	0.79	0.845	0.098	0.573	0.368	0.9	0.766	0.214	0.709	0.205	0.979	0.777	0.763	0.663	0.966	0.271
N	24052	25107	delta	NC016996	Common moorhen coronavirus HKU21	0.001	1	0.928	0.004	0.686	0.572	0.559	0.129	0.997	0	0.263	1	0.479	0.588	0.058	0.755	0	0.057	0.026	0.545	0.043	0.365	0.999	0.001	0.392	0.311	0.557	0.705	0.111	0.776	0.002	0.974	0.699	0.845	0.523	0.978	0.606	0.024	0.996	0.993	0.554	0.728	0.177	0.548
E	22723	22971	delta	NC016996	Common moorhen coronavirus HKU21	0.014	0.485	0.07	0.936	0.987	0.072	0.22	0.058	0.8	0.398	0.59	0.055	0.057	0.566	0.578	0.609	0.541	0.966	0.086	0.168	0.717	0.445	0.925	0.268	0.375	0.39	0.347	0.764	0.327	0.774	0.044	0.55332	0.522	0.727	0.968	0.148	0.101	0.477	0.729	0.249	0.483	0.736	0.588	0.491
M	22973	23779	delta	NC016996	Common moorhen coronavirus HKU21	0.002	0.928	0.023	0.993	0.539	0.551	0.833	0.066	0.951	0.004	0.252	0.609	0.795	0.482	0.842	0.041	0.445	0.713	0.38	0.06	0.95	0.135	0.186	0.685	0.999	0.327	0.36	0.556	0.664	0.551	0.384	0.834	0.015	0.812	0.953	0.173	0.178	0.477	0.337	0.68	0.963	0.052	0.444	0.589
NS7	24086	24688	delta	NC039208	Porcine coronavirus HKU15	0.739	0.994	0.024	0.028	0.234	0.242	0.301	0.913	0.304	0.013	0.996	0.349	0.449	0.35	0.202	0.715	0.171	0.113	0.467	0.921	0.951	0.73	0.991	0.004	0.384	0.631	0.783	0.997	0.219	0.134	0.009	0.999	0.457	0.047	0.593	0.41	0.288	0.687	0.997	0.056	0.36	0.196	0.469	0.574
M	23034	23687	delta	NC039208	Porcine coronavirus HKU15	0.047	1	0.384	0.003	0.692	0.322	0.813	0.107	0.839	0.001	0.063	0.995	0.281	0.12	0.606	0.772	0	0.06	0.051	0.541	0.481	0.332	0.878	0.053	0.625	0.923	0.696	0.07	0.282	0.877	0.134	0.988	0.846	0.059	0.675	0.954	0.257	0.078	0.976	0.947	0.999	0.127	0.404	0.473
E	22790	23041	delta	NC039208	Porcine coronavirus HKU15	0.003	0.315	0.147	0.967	0.998	0.27	0.62	0	0.749	0.01	0.673	0.616	0.002	0.984	0.19	0.534	0.656	0.966	0.064	0.001	0.616	0.859	0.622	0.732	0.365	0.126	0.058	0.347	0.451	0.856	0.158	0.576	0.155	0.869	0.978	0.273	0.868	0.041	0.183	0.821	0.247	0.996	0.356	0.283
S	19317	22796	delta	NC039208	Porcine coronavirus HKU15	0	1	0.001	0.045	0.998	0.053	0.989	0	0.998	0	0.146	1	0.062	0.932	0.722	0.226	0	0.02	0.01	0.068	0.998	0.999	0.993	0.01	0.768	0.933	0.189	0.833	0.148	0.69	0.001	0.939	0.657	0.71	0.783	0.922	0.81	0.001	1	1	0.876	0.275	0.686	0.023
N	23992	25020	delta	NC039208	Porcine coronavirus HKU15	0.001	1	0.569	0.019	0.827	0.053	0.47	0.692	0.999	0	0.244	0.946	0.062	0.87	0.536	0.322	0	0.024	0.21	0.877	0.351	0.988	0.999	0.492	0.033	0.073	0.206	0.801	0.109	0.682	0.081	0.29	0.995	0.549	0.756	0.596	0.463	0.301	0.89	0.996	0.647	0.568	0.932	0.076
orf1ab	533	19335	delta	NC039208	Porcine coronavirus HKU15	0	1	0	0	1	0	0.904	0	1	0	0	1	0	1	1	0.034	0	0	0	0	1	1	1	0	0.429	1	0	1	0.389	0.469	0	0.99	1	0.473	1	1	0.092	0	1	1	0.961	0.033	0.727	0
NS6	23687	23971	delta	NC039208	Porcine coronavirus HKU15	0.443	0.964	0.402	0.024	0.039	0.027	1	0.38	0.382	0.033	0.121	0.981	0.933	0.758	0.005	0.438	0.03	0.04	0.451	0.319	0.395	0.22	0.587	0.538	0.031	0.701	0.019	0.962	0.458	0.409	0.371	0.577	0.37	0.53	0.512	0.119	0.988	0.152	0.68	0.661	0.074	0.786	0.822	0.033
3	24029	24223	gamma	NC001451	Avian infectious bronchitis virus	0.219	0.97	0.215	0.054	0.211	0.283	0.478	0.467	0.904	0	0	0.85	0.105	0.266	0.921	0.334	0.036	0.054	0.206	0.644	0.521	0.799	0.832	0.373	0.544	0	0.003	0.116	0.785	0.645	0.21	0	0.442	0.639	0.519	0.499499	0.16	0.699	0.019	0.958	0.462	0.6	0.037	0.01
5	25488	25685	gamma	NC001451	Avian infectious bronchitis virus	0.813	0.016	0.099	0.886	0.27	0.934	0.817	0.003	0.363	0.992	0.234	0.03	0.196	0.007	0.553	0.94	0.967	0.998	0.045	0.026	0.743	0.004	0.126	0.854	0.431	0.355	0.132	0.031	0.234	0.985	0.888	0.425	0.107	0.158	0.606	0.886	0.331	0.217	0.15	0.31	0.682	0.929	0.24	0.481
3	24207	24533	gamma	NC001451	Avian infectious bronchitis virus	0.003	0.933	0.635	0.635	0.899	0.304	0.17	0.1	0.998	0.233	0.074	0.018	0.006	0.101	0.744	0.972	0.026	0.989	0.252	0.097	0.184	0.707	0.976	0.498	0.184	0.233	0.329	0.364	0.588	0.936	0.066	0.354	0.86	0.812	0.39	0.908	0.466	0.058	0.712	0.683	0.762	0.742	0.436	0.547
M	24505	25182	gamma	NC001451	Avian infectious bronchitis virus	0.133	0.957	0.071	0.56	0.555	0.76	0.38	0.155	1	0	0.004	0.668	0.001	0.385	1	0.399	0.25	0.511	0.16	0.332	0.858	0.847	0.998	0	0.731	0.979	0.283	0.783	0.885	0.866	0.098	0.924	0.841	0.336	0.564	0.841	0.096	0.627	1	0.4	0.393	0.933	0.783	0.944
2	20368	23856	gamma	NC001451	Avian infectious bronchitis virus	0.003	1	0	0.899	1	0.234	0.903	0	1	0	0	0.987	0	0.787	1	0.685	0.089	0.953	0.003	0.002	1	0.997	0.977	0.043	0.7	0.981	0.059	0.926	0.237	0.673	0.12	0.966	0.998	0.011	0.124	0.557	0.439	0.732	1	0.029	0.9	0.252	0.95	0.03
5	25682	25930	gamma	NC001451	Avian infectious bronchitis virus	0.533	0.098	0.742	0.392	0.035	0.711	0.75	0.366	0.972	0.416	0.035	0.115	0.081	0.579	0.316	0.739	0.516	0.708	0.208	0.554	0.1	0.257	0.816	0.471	0.103	0.551	0.338	0.388	0.358	0.621	0.594	0.607	0.677	0.172	0.014	0.691	0.816	0.473	0.835	0.347	0.59	0.501	0.9	0.34
3	23856	24029	gamma	NC001451	Avian infectious bronchitis virus	0.433	0.007	0.381	0.896	0.719	0.978	0.004	0.086	0.867	0.567	0	0.06	0.002	0.191	0.999	0.544	0.922	0.923	0.637	0.024	0.254	0.05	0.579	0.932	0.099	0.34	0.074	0.321	0.983	0.543	0.575	0	0.41	0.769	0.689	0.71	0.364	0.612	0.438	0.426	0.433	0.424	0.572	0.079
1ab	529	20417	gamma	NC001451	Avian infectious bronchitis virus	0	1	0	0.003	1	0.002	1	0	1	0	0	1	0	0.998	1	0.335	0	0.006	0	0	1	1	0.999	0	0.998	1	0.001	1	0.395	0.435	0.014	0.748	1	0.001	0.068	1	0.003	0.082	1	0.282	0.939	0.036	0.927	0
N	25873	27102	gamma	NC001451	Avian infectious bronchitis virus	0.001	1	0.373	0.115	0.317	0.822	0.875	0.027	1	0	0.014	1	0.106	0.432	0.87	0.427	0	0.127	0.072	0.146	0.54	0.656	1	0	0.468	0.787	0.099	0.904	0.304	0.29	0.004	0.994	0.969	0.175	0.315	0.816	0.21	0.543	1	0.285	0.074	0.74	0.297	0.443
1ab	529	12384	gamma	NC001451	Avian infectious bronchitis virus	0	1	0.002	0.012	1	0	1	0	1	0	0	1	0	0.995	1	0.219	0	0.007	0	0.003	0.998	1	0.999	0	0.977	1	0.043	1	0.445	0.158	0.011	0.947	0.999	0.01	0.177	1	0.015	0.016	1	0.287	0.734	0.025	0.814	0.008
CoVSW1 gp14	30146	31285	gamma	NC010646	Beluga Whale coronavirus SW1	0	0.999	0.988	0.047	0.528	0.977	0.223	0.026	1	0	0.001	0.999	0.641	0.117	0.618	0.574	0	0.115	0.167	0.061	0.007	0.542	1	0.063	0.063	0.32	0.98	0.005	0.726	0.739	0.004	0.997	0.759	0.533	0.053	0.966	0.788	0.096	0.996	0.973	0.442	0.777	0.642	0.822
CoVSW1 gp01	524	20514	gamma	NC010646	Beluga Whale coronavirus SW1	0	1	0.065	0.072	0.156	1	1	0	1	0	0	1	0.505	0.43	0.98	0.047	0	0.001	0	0	0.927	0.001	0.98	0	0.289	1	0.989	0.069	0.003	1	0.194	1	1	0	0	1	0.995	0.008	1	0.193	1	0.969	0.897	0.998
CoVSW1 gp02	524	12418	gamma	NC010646	Beluga Whale coronavirus SW1	0.002	1	0.327	0.019	0.517	1	1	0	1	0	0	1	0.291	0.683	0.966	0.068	0	0	0	0	0.644	0.005	0.945	0	0.127	1	0.928	0.068	0.14	1	0.145	0.991	1	0	0.007	0.997	0.863	0.085	1	0.263	1	0.774	0.712	0.991
CoVSW1 gp03	20450	24868	gamma	NC010646	Beluga Whale coronavirus SW1	0	0.974	0.014	1	0.471	1	0.998	0	1	0	0.068	1	0.819	0.812	0.635	0.013	0.488	0.959	0	0	0.984	0.004	0.916	0.001	0.955	0.912	1	0.132	0	0.998	0.05	0.595	0.982	0.041	0.008	1	0.577	0.168	0.997	0.436	0.999	0.855	0.634	1
CoVSW1 gp11	28705	28884	gamma	NC010646	Beluga Whale coronavirus SW1	0.202	0.306	0.438	0.636	0.713	0.965	0.67	0	0.518	0.483	0.145	0.413	0.251	0.015	0.34	0.937	0.392	0.967	0	0.017	0.291	0.002	0.706	0.267	0.184	0.697	0.528	0.022	0.746	0.984	0.191	0.41456	0.473	0.689	0.431	0.946	0.611	0.117	0.797	0.555	0	0.845371	0.748	0.76
CoVSW1 gp05	25145	25927	gamma	NC010646	Beluga Whale coronavirus SW1	0.011	1	0.122	0.164	0.735	0.957	0.845	0.001	0.987	0.012	0	0.988	0.2	0.001	0.999	0.817	0.006	0.544	0	0.171	0.805	0.165	0.471	0.431	0.868	0.967	0.544	0.057	0.787	0.972	0.495	0.434	0.915	0.058	0.526	0.994	0.047	0.082	0.976	0.244	0.996	0.492	0.189	0.728
CoVSW1 gp07	26339	26857	gamma	NC010646	Beluga Whale coronavirus SW1	0.018	0.211	0.333	0.993	0.321	0.341	0.999	0.007	0.938	0.035	0.202	0.524	0.679	0.977	0.011	0.15	0.72	0.918	0.005	0.238	0.527	0.116	0.578	0.772	0.077	0.689	0.562	0.44	0.048	0.942	0.479	0.545	0.57	0.378	0.746	0.624	0.972	0.015	0.875	0.682	0.817	0.791	0.968	0.912
CoVSW1 gp13	29402	30034	gamma	NC010646	Beluga Whale coronavirus SW1	0	0.999	0.911	0.158	0.711	0.994	0.455	0	0.977	0	0.299	0.958	0.599	0.034	0.051	0.975	0	0.823	0	0.113	0.039	0.103	0.763	0.031	0.429	0.758	0.939	0.068	0.26	0.916	0.189	0.956	0.403	0.441	0.016	0.998	0.962	0.065	0.914	0.606	0.999	0.278	0.138	0.959
CoVSW1 gp04	24874	25161	gamma	NC010646	Beluga Whale coronavirus SW1	0.028	0.908	0.485	0.324	0.578	0.84	0.802	0.003	0.442	0.014	0.335	0.896	0.758	0.147	0.1	0.721	0.049	0.624	0.007	0.151	0.282	0.488	0.242	0.375	0.472	0.409	0.627	0.218	0.057	0.879	0.329	0.01	0.839	0.445	0.214	0.983	0.8	0.055	0.269	0.68	0.847	0.63	0.141	0.743
CoVSW1 gp09	27378	28064	gamma	NC010646	Beluga Whale coronavirus SW1	0.053	0.912	0.474	0.401	0.864	0.882	0.281	0.01	0.976	0	0.059	0.976	0.025	0.694	0.878	0.377	0.061	0.341	0.081	0.031	0.376	0.29	0.884	0.011	0.361	0.805	0.393	0.846	0.324	0.792	0.226	0.959	0.939	0.047	0.013	0.818	0.765	0.395	0.98	0.205	0.198	0.938	0.457	0.773
CoVSW1 gp08	26847	27374	gamma	NC010646	Beluga Whale coronavirus SW1	0.028	0.992	0.477	0.191	0.006	0.948	0.787	0.328	0.989	0.001	0.152	0.596	0.83	0.052	0.321	0.662	0.013	0.393	0.141	0.631	0.39	0.294	0.989	0.039	0.036	0.625	0.848	0.443	0.413	0.581	0.14	0.475	0.971	0.579	0.267	0.895	0.524	0.227	0.994	0.583	0.439	0.486	0.845	0.311
CoVSW1 gp10	28067	28552	gamma	NC010646	Beluga Whale coronavirus SW1	0.476	0.553	0.413	0.277	0.015	0.925	0.899	0.114	0.378	0.149	0.386	0.763	0.944	0.149	0.089	0.618	0.325	0.482	0.102	0.345	0.398	0.058	0.035	0.669	0.857	0.272	0.978	0.035	0.524	0.346	0.917	0.883	0.095	0.064	0.204	0.371	0.58	0.704	0.019	0.13	0.156	0.522	0.034	0.683
CoVSW1 gp12	28941	29399	gamma	NC010646	Beluga Whale coronavirus SW1	0.016	0.959	0.694	0.235	0.884	0.246	0.972	0.003	0.839	0.012	0.024	0.979	0.198	0.708	0.083	0.704	0.013	0.529	0.013	0.081	0.192	0.325	0.642	0.023	0.669	0.665	0.931	0.958	0.012	0.166	0.33	0.834	0.781	0.183	0.145	0.432	0.944	0.22	0.771	0.223	0.848	0.032	0.11	0.926
CoVSW1 gp06	25930	26346	gamma	NC010646	Beluga Whale coronavirus SW1	0.482	0.768	0.708	0.043	0.522	0.549	0.34	0.278	0.606	0.002	0.076	0.996	0.12	0.851	0.642	0.141	0.067	0.01	0.086	0.657	0.176	0.748	0.452	0.253	0.282	0.888	0.949	0.725	0.046	0.153	0.65	0.118	0.691	0.122	0.188	0.752	0.25	0.8	0.868	0.016	0.472	0.111	0.706	0.812
ORFX	25309	25593	gamma	NC010800	Turkey coronavirus	0.22	0.047	0.778	0.696	0.526	0.997	0.009	0.043	0.96	0.051	0.066	0.444	0.023	0.233	0.931	0.566	0.518	0.789	0.015	0.448	0.102	0.072	0.9	0.859	0.106	0.151	0.489	0.32	0.97	0.322	0.298	0.0221106	0.548	0.879	0.077	0.901	0.478	0.342	0.534	0.487	0.724	0.163	0.758	0.395
5a	25669	25866	gamma	NC010800	Turkey coronavirus	0.687	0.146	0.143	0.639	0.014	0.969	0.91	0.012	0.745	0.671	0.225	0.093	0.375	0.022	0.394	0.879	0.832	0.97	0	0.129	0.698	0	0.505	0.883	0.1	0.253	0.386	0.054	0.361	0.947	0.707	0.226	0.201	0.617	0.687	0.71	0.487	0.143	0.317	0.643	0.516	0.856426	0.702	0.876
M	24637	25308	gamma	NC010800	Turkey coronavirus	0.063	0.991	0.014	0.702	0.859	0.778	0.284	0.036	0.989	0.002	0.167	0.607	0.002	0.15	0.998	0.561	0.26	0.802	0.145	0.075	0.967	0.724	0.995	0.007	0.972	0.884	0.09	0.881	0.973	0.882	0.061	0.972	0.327	0.532	0.938	0.727	0.044	0.599	0.999	0.377	0.398	0.923	0.617	0.866
3c	24336	24635	gamma	NC010800	Turkey coronavirus	0.002	0.893	0.43	0.788	0.976	0.7	0.004	0.038	0.925	0.222	0.36	0.101	0.1	0.031	0.889	0.831	0.077	0.968	0.025	0.131	0.366	0.344	0.791	0.535	0.827	0.413	0.429	0.095	0.797	0.859	0.091	0.21	0.592	0.938	0.945	0.851	0.012	0.272	0.506	0.544	0.876	0.512	0.291	0.909
1ab	529	20336	gamma	NC010800	Turkey coronavirus	0	1	0	0.009	1	0	1	0	1	0	0	1	0	1	1	0.059	0	0.001	0	0.001	1	1	1	0	1	1	0.038	1	0.037	0.856	0.001	0.996	1	0	0.065	1	0.027	0.023	1	0.759	0.929	0.427	0.875	0.017
5b	25863	26111	gamma	NC010800	Turkey coronavirus	0.848	0.129	0.593	0.181	0.151	0.801	0.596	0.135	0.83	0.539	0.134	0.144	0.025	0.353	0.371	0.951	0.582	0.839	0.352	0.076	0.221	0.419	0.651	0.221	0.364	0.734	0.034	0.439	0.775	0.811	0.711	0.704	0.259	0.132	0.155	0.725	0.75	0.204	0.795	0.293	0.667	0.67	0.652	0.456
3b	24161	24355	gamma	NC010800	Turkey coronavirus	0.512	0.962	0.106	0.044	0.307	0.24	0.793	0.194	0.986	0.041	0	0.531	0.001	0.216	0.912	0.924	0.083	0.485	0.234	0.234	0.68	0.405	1	0.114	0.178	0.004	0.007	0.636	0.596	0.743	0.139	0.714715	0.646	0.8	0.744	0.537	0.43	0.365	0.493	0.879	0.258	0.8	0.416	0.386
3a	23988	24161	gamma	NC010800	Turkey coronavirus	0.819	0.419	0.046	0.255	0.656	0.118	0.204	0.384	0.713	0.36	0.132	0.226	0	0.515	0.956	0.668	0.643	0.492	0.289	0.404	0.755	0.754	0.767	0.282	0	0.555	0.268	0.592	0.754	0.513	0.622	0	0.269	0.404	0.995	0.394	0.144	0.394	0.81	0.782	0.435282	0.432	0.76	0.36
S	20360	24040	gamma	NC010800	Turkey coronavirus	0	1	0	0.799	0.988	0.847	0.886	0	1	0	0.012	0.997	0	0.094	1	0.467	0.038	0.781	0.089	0	1	0.726	0.899	0.196	1	0.491	0.528	0.318	0.556	0.479	0.153	0.542	0.665	0.239	0.217	0.533	0.07	0.887	0.844	0.508	0.672	0.32	0.208	0.131
N	26054	27283	gamma	NC010800	Turkey coronavirus	0.034	0.995	0.162	0.22	0.152	0.893	0.974	0.007	0.995	0	0.019	0.998	0.266	0.317	0.793	0.434	0.016	0.237	0.056	0.079	0.781	0.376	0.999	0.005	0.163	0.83	0.251	0.887	0.173	0.276	0.014	0.554	0.995	0.224	0.417	0.605	0.181	0.686	1	0.235	0.168	0.549	0.781	0.197
1a	529	12384	gamma	NC010800	Turkey coronavirus	0	1	0.001	0.027	1	0	0.912	0	1	0	0	1	0	1	1	0.001	0	0	0.001	0.024	0.999	1	1	0	0.996	1	0.312	1	0.197	0.222	0	1	0.996	0.014	0.17	1	0.022	0.047	1	0.798	0.853	0.019	0.888	0.027
HGI29 gp15	27398	27691	gamma	NC046965	Canada goose coronavirus	0.008	0.943	0.794	0.241	0.86	0.794	0.125	0.047	0.983	0.004	0.008	0.828	0.035	0.169	0.94	0.665	0.009	0.46	0.249	0.03	0.118	0.63	0.886	0.129	0.205	0.423	0.379	0.116	0.598	0.587	0.241	0.985	0.675	0.256	0.214	0.109	0.654	0.752	0.864	0.449	0.512	0.527	0.661	0.753
HGI29 gp12	25767	25967	gamma	NC046965	Canada goose coronavirus	0.695	0.678	0.152	0.216	0.451	0.059	0.871	0.187	0.044	0.451	0.703	0.558	0.589	0.424	0.035	0.675	0.4	0.496	0.138	0.365	0.644	0.424	0.137	0.521	0.285	0.877	0.159319	0.753454	0.155	0.932	0.773	0.048	0.941	0.105	0.543	0.74	0.783	0.089	0.644	0.373	0.806	0.77	0.727	0.537
HGI29 gp01	554	20085	gamma	NC046965	Canada goose coronavirus	0	1	0	0.858	1	0.946	0.999	0	1	0	0	1	0	0.986	1	0.002	0	0.03	0	0	1	0.998	1	0	0.995	1	0.062	0.999	0.454	0.916	0.013	0.891	1	0.026	0.044	1	0.014	0.002	1	0.596	0.573	0.957	0.999	0.005
HGI29 gp06	23913	24215	gamma	NC046965	Canada goose coronavirus	0.018	0.897	0.127	0.733	0.612	0.779	0	0.374	0.84	0.02	0.654	0.421	0.456	0.19	0.893	0.173	0.18	0.452	0.651	0.144	0.705	0.433	0.792	0.086	0.919	0.466	0.195	0.228	0.834	0.874	0.147	0.497	0.74	0.396	0.96	0.417	0.005	0.542	0.639	0.619	0.706	0.736	0.031	0.351
HGI29 gp10	25354	25632	gamma	NC046965	Canada goose coronavirus	0.774	0.904	0.253	0.022	0.463	0.227	0.927	0.115	0.493	0.292	0	0.969	0.067	0.125	0.786	0.769	0.107	0.16	0.016	0.71	0.552	0.575	0.058	0.499	0.186	0.998	0.22	0.344	0.622	0.866	0.972	0.027	0.879	0.136	0.48	0.933	0.581	0.06	0.923	0.626	0.946	0.428	0.851	0.455
HGI29 gp07	24212	24892	gamma	NC046965	Canada goose coronavirus	0.001	0.892	0.464	0.898	0.85	0.219	0.995	0.001	0.997	0	0	0.996	0.185	0.972	0.286	0.169	0.096	0.583	0.131	0.005	0.389	0.239	0.881	0.132	0.316	0.753	0.36	0.887	0.019	0.768	0.311	0.997	0.987	0.006	0.877	0.305	0.731	0.128	0.958	0.305	0.886	0.406	0.721	0.803
HGI29 gp05	23786	23953	gamma	NC046965	Canada goose coronavirus	0.186	0.389	0.541	0.431	0.976	0.231	0.09	0.091	0.882	0.089	0.036	0.57	0	0.747	0.887	0.625	0.256	0.653	0.69	0	0.221	0.747	0.709	0.192	0.144	0.901	0.074	0.792235	0.854	0.767	0.399	0.622393	0.815	0.101	0.93	0.488	0.093	0.253	0.959	0.111	0.659	0	0.932	0.445
HGI29 gp02	554	12031	gamma	NC046965	Canada goose coronavirus	0	1	0.003	0.722	1	0.785	0.976	0	1	0	0	1	0	0.993	1	0.005	0	0.034	0.006	0	0.997	1	0.987	0	0.877	1	0.119	0.972	0.769	0.727	0.086	0.994	1	0.005	0.081	1	0.033	0.025	1	0.209	0.59	0.775	0.997	0.008
HGI29 gp13	25964	26221	gamma	NC046965	Canada goose coronavirus	0.967	0.491	0.418	0.023	0.117	0.408	0.079	0.951	0.488	0.652	0.676	0.042	0.143	0.167	0.499	0.825	0.319	0.217	0.522	0.961	0.343	0.144	0.893	0.185	0.054	0.901	0.468	0.429	0.902	0.685	0.354	0.869	0.371	0.272	0.071	0.678	0.666	0.43	0.971	0.318	0.357	0.779	0.908	0.374
HGI29 gp08	24892	25158	gamma	NC046965	Canada goose coronavirus	0.237	0.421	0.04	0.79	0.588	0.065	0.621	0.446	0.811	0.058	0.34	0.455	0.098	0.958	0.573	0.058	0.694	0.338	0.339	0.545	0.795	0.752	0.644	0.206	0.168	0.959	0.195	0.612	0.335	0.652	0.505	0.129	0.302	0.623	0.984	0.498	0.059	0.154	0.99	0.656	0.256	0.761	0.971	0.16
HGI29 gp11	25574	25783	gamma	NC046965	Canada goose coronavirus	0.673	0.779	0.041	0.297	0.292	0.475	0.919	0.007	0.563	0.001	0.292	0.918	0.121	0.711	0.374	0.406	0.557	0.34	0.293	0.006	0.885	0.316	0.696	0.003	0.703	0.715	0.818	0.467	0.347	0.548	0.562	0.948	0.03	0.344	0.102	0.505	0.945	0.317	0.846	0.462	0.418	0.49	0.187	0.853
HGI29 gp09	25155	25346	gamma	NC046965	Canada goose coronavirus	0.254	0.396	0.732	0.231	0.885	0.254	0.299	0.149	0.601	0.089	0	0.965	0.023	0.806	0.788	0.163	0.191	0.12	0.123	0.351	0.099	0.763	0.341	0.426	0.703	0.305	0.011	0.939	0.465	0.385	0.564	0.281	0.746	0.189	0.93	0.221	0.117	0.598	0.282	0.739	0.106	0.693	0.285	0.437
HGI29 gp16	27669	28211	gamma	NC046965	Canada goose coronavirus	0.124	0.998	0.198	0.045	0.899	0.375	0.147	0.27	0.841	0	0.145	0.945	0.029	0.277	0.956	0.483	0.011	0.088	0.313	0.315	0.648	0.908	0.525	0.128	0.766	0.956	0.773	0.486	0.048	0.356	0.537	0.419	0.648	0.241	0.33	0.879	0.346	0.259	0.961	0.427	0.052	0.812	0.691	0.571
HGI29 gp03	20069	23623	gamma	NC046965	Canada goose coronavirus	0	1	0	0.253	0.899	0.509	0.998	0	1	0	0.001	1	0.211	0.307	0.987	0.151	0	0.083	0.008	0.011	1	0.893	1	0	0.9	0.999	0.278	0.999	0.68	0.309	0.002	0.147	1	0.816	0.951	0.996	0.092	0.006	1	0.912	0.325	0.378	0.737	0.276
HGI29 gp04	23616	23777	gamma	NC046965	Canada goose coronavirus	0.012	0.483	0.538	0.602	0.478	0.085	0.712	0.405	0.866	0.016	0.077	0.625	0.276	0.976	0.162	0.088	0.177	0.229	0.393	0.396	0	0.737	0.345	0.368	0	0.704	0.756	0.834	0.197342	0.264	0.451	0	0	0.927	0.531	0.852	0.346	0.146	0.724	0.923	0.114	0.612	0.696	0.055
HGI29 gp14	26149	27393	gamma	NC046965	Canada goose coronavirus	0.001	1	0.887	0.001	0.554	0.196	0.822	0.271	0.996	0	0.001	1	0.238	0.985	0.591	0.008	0	0	0.116	0.622	0.07	0.967	1	0.196	0.023	0.936	0.482	0.686	0.203	0.129	0.011	0.981	0.999	0.009	0.225	0.786	0.637	0.523	1	0.675	0.253	0.192	0.926	0.004
3	23862	24035	gamma	NC048213	Infectious bronchitis virus	0.45	0.02	0.273	0.871	0.75	0.954	0.049	0.048	0.855	0.556	0	0.052	0.001	0.199	0.965	0.729	0.916	0.968	0.352	0.021	0.371	0.073	0.525	0.93	0.108	0.258	0.079	0.062	0.948	0.663	0.656	0	0.243	0.753	0.763	0.651	0.521	0.566	0.317	0.454	0.713	0.413	0.491	0.234
5	25539	25736	gamma	NC048213	Infectious bronchitis virus	0.946	0.091	0.035	0.631	0.21	0.96	0.525	0.011	0.245	0.797	0.515	0.149	0.14	0.011	0.77	0.875	0.967	0.965	0.012	0.125	0.891	0.017	0.266	0.864	0.689	0.032	0.137	0.173	0.251	0.909	0.942	0.144	0.116	0.657	0.44	0.455	0.586	0.177	0.024	0.703	0.141	0.862	0.053	0.359
HO266 gp1	529	20423	gamma	NC048213	Infectious bronchitis virus	0	1	0	0	1	0.175	1	0	1	0	0	1	0	0.132	1	0.92	0	0.007	0	0	1	1	1	0	1	1	0.004	1	0.665	0.905	0.003	0.857	1	0.003	0.489	1	0	0.025	1	0.612	0.999	0.174	0.546	0.011
3	24210	24539	gamma	NC048213	Infectious bronchitis virus	0.003	0.913	0.644	0.548	0.852	0.097	0.347	0.197	0.999	0.261	0.08	0.013	0.015	0.14	0.628	0.965	0.014	0.973	0.494	0.1	0.186	0.592	0.975	0.404	0.185	0.28	0.209	0.695	0.704	0.824	0.073	0.315	0.865	0.824	0.613	0.837	0.338	0.091	0.787	0.607	0.708	0.714	0.42	0.455
3	24035	24229	gamma	NC048213	Infectious bronchitis virus	0.074	0.961	0.239	0.221	0.219	0.885	0.512	0.062	0.993	0	0	0.614	0.057	0.092	0.921	0.678	0.049	0.511	0.038	0.245	0.505	0.298	0.944	0.348	0.423	0.005	0.002	0.216	0.743	0.783	0.087	0	0.512	0.543	0.498	0.626	0.411	0.487	0.139	0.929	0.063	0.776	0.09	0.089
S	20374	23835	gamma	NC048213	Infectious bronchitis virus	0	1	0	0.994	1	0.332	0.775	0	1	0	0.016	0.84	0	0.675	1	0.591	0.229	0.992	0.001	0.007	1	0.98	0.987	0.042	0.742	0.979	0.05	0.822	0.479	0.78	0.052	0.999	0.991	0.017	0.236	0.691	0.309	0.641	1	0.027	0.883	0.403	0.975	0.112
4	24511	25188	gamma	NC048213	Infectious bronchitis virus	0.079	0.943	0.101	0.693	0.682	0.889	0.274	0.066	1	0.003	0.001	0.691	0	0.27	1	0.385	0.245	0.632	0.163	0.151	0.826	0.695	0.998	0.005	0.783	0.95	0.277	0.779	0.926	0.777	0.203	0.942	0.825	0.351	0.674	0.627	0.084	0.796	1	0.343	0.201	0.956	0.812	0.941
HO266 gp1	529	12480	gamma	NC048213	Infectious bronchitis virus	0.002	1	0	0.002	1	0.254	1	0	0.994	0	0	1	0	0.451	1	0.568	0	0	0	0	1	1	0.995	0	0.982	1	0.225	0.999	0.431	0.63	0.002	0.966	0.992	0.015	0.431	1	0.016	0.004	1	0.673	0.965	0.089	0.482	0.106
5	25733	25981	gamma	NC048213	Infectious bronchitis virus	0.801	0.084	0.677	0.26	0.099	0.747	0.589	0.275	0.854	0.607	0.054	0.182	0.045	0.412	0.45	0.855	0.614	0.697	0.333	0.265	0.177	0.44	0.633	0.358	0.229	0.673	0.159	0.391	0.687	0.548	0.77	0.448	0.524	0.125	0.032	0.784	0.763	0.309	0.694	0.218	0.598	0.35	0.666	0.265
6	25924	27153	gamma	NC048213	Infectious bronchitis virus	0.003	1	0.306	0.051	0.264	0.714	0.934	0.041	1	0	0.009	1	0.199	0.419	0.802	0.397	0	0.063	0.05	0.234	0.614	0.861	1	0.001	0.531	0.703	0.326	0.752	0.204	0.434	0	0.994	0.967	0.229	0.201	0.925	0.177	0.539	1	0.647	0.543	0.359	0.372	0.195
5a	25587	25784	gamma	NC048214	Duck coronavirus	0.312	0.46	0.663	0.228	0.73	0.428	0.302	0.177	0.188	0.432	0.591	0.379	0.324	0.286	0.14	0.801	0.198	0.631	0.026	0.517	0.153	0.182	0.102	0.097	0.008	0.945	0.989	0.188	0.079	0.067	0.697	0.847	0.733	0.002	0.09	0.669	0.951	0.285	0.836	0	0.274	0.225	0.433	0.994
1ab	347	20364	gamma	NC048214	Duck coronavirus	0.005	1	0	0	1	0.956	0.949	0	1	0	0	1	0	0.477	1	0.917	0	0	0	0	1	1	0.915	0	0.964	1	0.001	1	0.962	0.996	0.495	0.999	1	0	0.086	1	0.013	0	1	0.39	0.994	0.873	1	0.072
3c	24238	24519	gamma	NC048214	Duck coronavirus	0.005	0.807	0.472	0.812	1	0.155	0.102	0.004	0.938	0.692	0.053	0.046	0.002	0.055	0.913	0.958	0.103	0.998	0.09	0.003	0.313	0.528	0.022	0.877	0.892	0.302	0.139	0.346	0.276	0.986	0.617	0.167	0.63	0.638	0.988	0.761	0.013	0.173	0.013	0.42	0.777	0.848	0.093	0.423
5b	25781	26029	gamma	NC048214	Duck coronavirus	0.526	0.659	0.131	0.322	0.671	0.909	0.579	0.005	0.506	0.169	0.278	0.688	0.053	0.03	0.668	0.947	0.446	0.911	0.102	0.002	0.727	0.171	0.617	0.268	0.36	0.474	0.021	0.445	0.901	0.96	0.466	0.272	0.621	0.401	0.883	0.472	0.207	0.198	0.579	0.539	0.743	0.581	0.34	0.784
S	20318	23893	gamma	NC048214	Duck coronavirus	0.08	1	0	0.478	1	0.54	0.909	0	0.76	0	0.119	1	0.001	0.11	1	0.619	0.141	0.627	0.011	0.002	1	0.747	0.055	0.097	0.999	1	0.496	0.829	0.165	0.883	0.923	0.059	0.773	0.038	0.356	0.837	0.082	0.387	0.998	0.12	0.17	0.994	0.796	0.658
ORFY	27246	27458	gamma	NC048214	Duck coronavirus	0.651	0.958	0.01	0.156	0.008	0.285	0.985	0.149	0.915	0.003	0.233	0.692	0.138	0.529	0.307	0.605	0.289	0.361	0.439	0.097	0.948	0.718	0.39	0.367	0.555	0.395	0.211	0.634801	0.274	0.869	0.935	0.474	0.007	0.703	0.254	0.471	0.976	0.02	0.267	0.929	0.829876	0.685	0.348	0.411
1a	347	12292	gamma	NC048214	Duck coronavirus	0.131	1	0	0	1	0.758	0.835	0	0.978	0	0	1	0	0.661	1	0.279	0	0	0.001	0	1	1	0.929	0	0.883	1	0.028	0.995	0.949	0.826	0.224	0.989	1	0	0.325	1	0.007	0.005	1	0.147	0.959	0.319	0.995	0.194
M	24516	25223	gamma	NC048214	Duck coronavirus	0.132	0.98	0.031	0.284	0.654	0.387	0.89	0.061	0.992	0	0.011	0.996	0.013	0.923	0.946	0.102	0.11	0.063	0.586	0.019	0.927	0.746	0.683	0.273	0.939	0.77	0.191	0.816	0.131	0.793	0.714	0.396	0.703	0.163	0.593	0.277	0.283	0.845	0.858	0.688	0.69	0.653	0.595	0.348
3a	23893	24066	gamma	NC048214	Duck coronavirus	0.624	0.383	0	0.592	0.382	0.786	0.522	0.07	0.913	0	0.145	0.235	0.005	0.363	0.886	0.739	0.81	0.853	0.191	0.136	0.948	0.108	0.707	0.045	0.774	0.483	0.716	0.153	0.35	0.659	0.616	0	0	0.469	0.769	0.296	0.384	0.673	0.605	0.087	0.776	0.315	0.219	0.946
ORFX	25224	25508	gamma	NC048214	Duck coronavirus	0.485	0.257	0.562	0.361	0.954	0.849	0.016	0.04	0.911	0.137	0.171	0.303	0	0.424	0.91	0.928	0.434	0.874	0.046	0.178	0.244	0.656	0.858	0.065	0.151	0.802	0.266	0.26	0.987	0.499	0.383	0.396378	0.336	0.674	0.178	0.985	0.343	0.055	0.975	0.388	0.233	0.528	0.792	0.696
N	25972	27216	gamma	NC048214	Duck coronavirus	0.293	1	0.135	0.001	0.139	0.194	0.987	0.24	0.964	0	0.092	1	0.182	0.912	0.362	0.236	0.003	0.001	0.089	0.684	0.805	0.979	1	0.025	0.847	0.001	0.055	0.996	0.079	0.281	0.003	0.8	0.684	0.912	0.305	0.75	0.652	0.378	0.884	1	0.12	0.581	0.088	0.054
3b	24066	24257	gamma	NC048214	Duck coronavirus	0.541	0.983	0	0.085	0.757	0	0.198	0.527	0.732	0.061	0	0.648	0.001	0.235	1	0.446	0.167	0.128	0.483	0.395	0.985	0.936	0.974	0.155	0.679	0.176	0.233	0.771	0.509	0.17	0.105	0.677126	0.215	0.59	0.31	0.111	0.746	0.858	0.752	0.599	0.063	0.427	0.515	0.215

## Sheet: SARS-CoV-2 nsp
	belowS_A_A_	belowS_C_A_	belowS_G_A_	belowS_T_A_	belowS_A_C_	belowS_C_C_	belowS_G_C_	belowS_T_C_	belowS__G_A	belowS__G_C	belowS__G_G	belowS__G_T	belowS__T_A	belowS__T_C	belowS__T_G	belowS__T_T	belowS_W_A_	belowS__T_W	belowS_RT_C_	belowS_YT_C_	belowS_W_C_W	belowS_W_T_W	repTrFrac_belowS_A_A_	repTrFrac_belowS_C_A_	repTrFrac_belowS_G_A_	repTrFrac_belowS_T_A_	repTrFrac_belowS_A_C_	repTrFrac_belowS_C_C_	repTrFrac_belowS_G_C_	repTrFrac_belowS_T_C_	repTrFrac_belowS__G_A	repTrFrac_belowS__G_C	repTrFrac_belowS__G_G	repTrFrac_belowS__G_T	repTrFrac_belowS__T_A	repTrFrac_belowS__T_C	repTrFrac_belowS__T_G	repTrFrac_belowS__T_T	repTrFrac_belowS_W_A_	repTrFrac_belowS__T_W	repTrFrac_belowS_RT_C_	repTrFrac_belowS_YT_C_	repTrFrac_belowS_W_C_W	repTrFrac_belowS_W_T_W
nsp1	0.08	0.995	0.166	0.19	0.891	0.041	0.564	0.417	0.166	0.564	0.218	0.673	0.19	0.417	0.707	0.493	0.036	0.292	0.408	0.423	0.959	0.241	0.542	0.074	0.672	0.651	0.565	0.956	0.148	0.716	0.573	0.792	0.242	0.363	0.552	0.232	0.815	0.431	0.702	0.526	0.56	0.663	0.594	0.773
nsp2	0.354	1	0.353	0	0.999	0.323	0.306	0.019	0.353	0.306	0.1	0.94	0	0.019	1	0.474	0	0	0.056	0.154	0.999	0	0.66	0.016	0.721	0.974	0.121	0.769	0.629	0.648	0.394	0.605	0.537	0.299	0.226	0.848	0.024	0.997	0.882	0.998	0.587	0.551	0.013	0.558
nsp3	0.004	1	0.024	0.002	1	0.008	0.024	0	0.024	0.024	0.005	1	0.002	0	1	0.857	0	0.036	0.006	0	1	0	0.753	0.014	0.983	1	0	1	0.98	0.769	0.623	0.736	0.874	0.005	0.138	0.999	0.308	0.826	1	0.598	0.849	0.456	0	0.53
nsp4B	0.117	1	0.006	0.073	0.999	0.022	0.823	0.014	0.006	0.823	0.001	0.999	0.073	0.014	1	0.106	0.013	0.004	0.067	0.127	0.998	0	0.973	0.183	0.901	0.541	0.011	0.997	0.76	0.223	0.942	0.003	0.962	0.324	0.766	1	0.102	0.377	0.911	0.622	0.545	0.13	0	0.798
nsp5A	0.011	1	0.074	0.194	1	0.252	0.043	0.003	0.074	0.043	0.672	0.966	0.194	0.003	0.974	0.881	0.007	0.655	0	0.313	0.975	0.157	0.692	0.174	0.495	0.92	0.063	0.935	0.974	0.422	0.925	0.404	0.229	0.253	0.193	0.988	0.094	0.633	0.963	0.429	0.861	0.204	0.048	0.839
nsp6	0.03	0.998	0.389	0.075	0.994	0.381	0.038	0.14	0.389	0.038	0.007	0.999	0.075	0.14	1	0.097	0.006	0.003	0.091	0.415	0.999	0.001	0.909	0.039	0.689	0.903	0.706	0.965	0.259	0.027	0.294	0.979	0.83	0.029	0.333	1	0.103	0.11	0.986	0.076	0.035	0.194	0.514	0.176
nsp7	0.607	0.992	0.006	0.029	0.709	0.074	0.477	0.373	0.006	0.477	0.618	0.726	0.029	0.373	0.878	0.628	0.054	0.098	0.297	0.503	0.976	0.018	0.721	0.33	0.68	0.186	0.164	0.728	0.582	0.658	0.86	0.164	0.314	0.392	0.879	0.375	0.23	0.444	0.465	0.726	0.683	0.43	0.248	0.735
nsp8	0.022	1	0.069	0.021	0.907	0.595	0	0.315	0.069	0	0.637	0.987	0.021	0.315	0.963	0.496	0	0.048	0.631	0.173	0.995	0.001	0.855	0.122	0.817	0.99	0.212	0.817	0.986	0.532	0.682	0.9	0.232	0.306	0.17	0.706	0.279	0.803	0.997	0.65	0.329	0.736	0.05	0.725
nsp9	0.004	0.767	0.451	0.858	1	0.189	0.009	0	0.451	0.009	0.167	0.976	0.858	0	0.927	0.196	0.133	0.682	0.384	0	0.989	0.003	0.652	0.619	0.586	0.128	0.076	0.374	0.89	0.147	0.295	0.784	0.667	0.129	0.59	0.968	0.174	0.281	0.226	0.403	0.243	0	0.061	0.5
nsp10	0.388	0.838	0.004	0.66	0.97	0.223	0.162	0.146	0.004	0.162	0.348	0.985	0.66	0.146	0.962	0.038	0.634	0.138	0.604	0.012	0.993	0.012	0.379	0.511	0.903	0.688	0.5	0.741	0.736	0.023	0.867	0.56	0.397	0.164	0.602	0.903	0.391	0.107	0.625	0.169	0.04	0.054	0.014	0.981
nsp12	0.004	1	0	0.582	1	0.016	0.044	0.073	0	0.044	0.21	1	0.582	0.073	1	0.002	0.051	0.011	0.186	0.136	1	0	0.993	0.263	0.874	0.305	0.323	1	0.408	0.049	0.991	0.964	0.367	0.001	0.861	1	0.003	0.658	0.894	0.903	0.16	0.146	0.024	0.903
nsp13	0.025	1	0.043	0	1	0.004	0.971	0	0.043	0.971	0.015	0.878	0	0	1	0.278	0	0.001	0.045	0.02	0.999	0.008	0.908	0.088	0.902	0.995	0.239	1	0.091	0.253	0.596	0.105	0.759	0.455	0.354	1	0.082	0.724	1	0.563	0.48	0.187	0.07	0.535
nsp14	0	0.999	0.057	0.631	1	0.026	0.31	0.009	0.057	0.31	0.005	1	0.631	0.009	1	0.011	0.015	0.047	0.184	0.011	1	0	0.695	0.7	0.668	0.321	0.551	0.974	0.385	0.004	0.901	0.494	0.936	0.015	0.862	1	0.003	0.197	0.603	0.501	0.249	0	0.016	0.991
nsp15	0.036	1	0.443	0.08	0.989	0.499	0.019	0.083	0.443	0.019	0.235	0.967	0.08	0.083	0.996	0.298	0.001	0.053	0.305	0.107	1	0.024	0.214	0.283	0.847	0.413	0.247	0.753	0.924	0.137	0.141	0.787	0.56	0.395	0.51	0.986	0.289	0.611	0.193	0.683	0.493	0.068	0.019	0.783
nsp16	0.384	0.993	0.047	0.121	0.968	0.04	0.354	0.277	0.047	0.354	0.173	0.987	0.121	0.277	0.924	0.596	0.108	0.215	0.45	0.217	0.981	0.342	0.316	0.259	0.683	0.99	0.155	0.907	0.361	0.911	0.873	0.176	0.741	0.093	0.194	0.675	0.271	0.839	0.97	0.578	0.801	0.749	0.493	0.609
