# Supplementary material for: SARS-CoV-2 evasion from ADAR hyper-editing is both genome-encoded and sustained by the virus replication strategy
Source: Research Square preprint supplement (doi:10.21203/rs.3.rs-314516/v2), 2021-04-12
Supplement: Supplementary file 3 [file 57ea005e290ec0704a13be35.xlsx]

## Sheet: metadati
BioProject	Run	LibraryLayout	LibrarySelection	Organism	Tissue	fastq name	No of reads	viral reads	he reads	he ratio
PRJNA616446	SRR11454606	PAIRED	RANDOM PCR	Severe acute respiratory syndrome coronavirus 2			5672978	3339	0	0
PRJNA616446	SRR11454607	PAIRED	RANDOM PCR	Severe acute respiratory syndrome coronavirus 2			4419065	21090	1	0.0474158
PRJNA616446	SRR11454608	PAIRED	RANDOM PCR	Severe acute respiratory syndrome coronavirus 2			2698450	159070	0	0
PRJNA616446	SRR11454612	PAIRED	RANDOM PCR	Severe acute respiratory syndrome coronavirus 2			3760623	1794	0	0
PRJNA616446	SRR11454613	PAIRED	RANDOM PCR	Severe acute respiratory syndrome coronavirus 2			5427416	299995	0	0
PRJNA616446	SRR11454614	PAIRED	RANDOM PCR	Severe acute respiratory syndrome coronavirus 2			5769705	643017	0	0
PRJNA616446	SRR11454615	PAIRED	RANDOM PCR	Severe acute respiratory syndrome coronavirus 2			5236753	41499	0	0
PRJNA623895	SRR11513776	PAIRED	PCR	Severe acute respiratory syndrome coronavirus 2			3861065	5911	0	0
PRJNA624231	SRR11517432	PAIRED	RANDOM	Severe acute respiratory syndrome coronavirus 2			9543823	672921	121	0.179813
PRJNA625669	SRR11558553	PAIRED	RANDOM	Severe acute respiratory syndrome coronavirus 2			2100929	1295	0	0
PRJNA631753	SRR11772358	PAIRED	cDNA	Homo sapiens	lung		50782746	231640	55	0.237437
PRJNA631753	SRR11772359	PAIRED	cDNA	Homo sapiens	lung		6962576	24156	8	0.331181
PRJNA631753	SRR11772360	PAIRED	cDNA	Homo sapiens	lung		5496594	9207	0	0
PRJNA631753	SRR11772361	PAIRED	cDNA	Homo sapiens	lung		3022980	17248	9	0.5218
PRJNA631753	SRR11772362	PAIRED	cDNA	Homo sapiens	heart		9334506	0		#DIV/0!
PRJNA631753	SRR11772363	PAIRED	cDNA	Homo sapiens	lung		7294348	210		0
PRJNA631753	SRR12340063	PAIRED	cDNA	Homo sapiens	lung		16711550	31374	0	0
PRJNA631753	SRR11772365	PAIRED	cDNA	Homo sapiens	jejunum		7434306	2		0
PRJNA631753	SRR12340064	PAIRED	cDNA	Homo sapiens	lung		15091680	6715	11	1.63812
PRJNA631753	SRR11772367	PAIRED	cDNA	Homo sapiens	heart		8508842	0		#DIV/0!
PRJNA631753	SRR12340077	PAIRED	cDNA	Homo sapiens	lung		16472702	173		0
PRJNA631753	SRR11772369	PAIRED	cDNA	Homo sapiens	heart		8053846	0		#DIV/0!
PRJNA631753	SRR12340081	PAIRED	cDNA	Homo sapiens	lung		18963084	522		0
PRJNA631753	SRR12340083	PAIRED	cDNA	Homo sapiens	lung		20208754	9943	0	0
PRJNA631753	SRR11772372	PAIRED	cDNA	Homo sapiens	heart		7396514	0		#DIV/0!
PRJNA631753	SRR11772373	PAIRED	cDNA	Homo sapiens	liver		10318768	0		#DIV/0!
PRJNA631753	SRR12340084	PAIRED	cDNA	Homo sapiens	lung		15700658	1821	0	0
PRJNA631753	SRR11772375	PAIRED	cDNA	Homo sapiens	kidney		10190290	8		0
PRJNA631753	SRR11772376	PAIRED	cDNA	Homo sapiens	heart		9568286	2		0
PRJNA631753	SRR11772377	PAIRED	cDNA	Homo sapiens	bowel		14289952	2		0
PRJNA631753	SRR12340086	PAIRED	cDNA	Homo sapiens	lung		18024340	20296	0	0
PRJNA631753	SRR12340087	PAIRED	cDNA	Homo sapiens	lung		14675622	72379	0	0
PRJNA631753	SRR12340088	PAIRED	cDNA	Homo sapiens	lung		16267560	63963	0	0
PRJNA631753	SRR12340089	PAIRED	cDNA	Homo sapiens	lung		17120350	168887	0	0
PRJNA631753	SRR11772382	PAIRED	cDNA	Homo sapiens	fat		13427520	0		#DIV/0!
PRJNA631753	SRR12340090	PAIRED	cDNA	Homo sapiens	lung		14500750	84015	0	0
PRJNA631753	SRR11772384	PAIRED	cDNA	Homo sapiens	skin		13666654	0		#DIV/0!
PRJNA631753	SRR11772385	PAIRED	cDNA	Homo sapiens	bowel		16272054	1		0
PRJNA631753	SRR11772386	PAIRED	cDNA	Homo sapiens	liver		13026914	3		0
PRJNA631753	SRR11772387	PAIRED	cDNA	Homo sapiens	kidney		20377132	0		#DIV/0!
PRJNA631753	SRR11772388	PAIRED	cDNA	Homo sapiens	heart		13193070	0		#DIV/0!
PRJNA631753	SRR11772389	PAIRED	cDNA	Homo sapiens	marrow		15770004	3		0
PRJNA631753	SRR12340091	PAIRED	cDNA	Homo sapiens	lung		15705434	105		0
PRJNA631753	SRR11772364	PAIRED	cDNA	Homo sapiens	lung		8246060	11		0
PRJNA631753	SRR11772366	PAIRED	cDNA	Homo sapiens	lung		8159232	5		0
PRJNA631753	SRR11772368	PAIRED	cDNA	Homo sapiens	lung		49320626	1		0
PRJNA631753	SRR11772370	PAIRED	cDNA	Homo sapiens	lung		14474116	1		0
PRJNA631753	SRR11772371	PAIRED	cDNA	Homo sapiens	lung		12307428	1		0
PRJNA631753	SRR11772374	PAIRED	cDNA	Homo sapiens	lung		10297346	8		0
PRJNA631753	SRR11772378	PAIRED	cDNA	Homo sapiens	lung		12987374	7		0
PRJNA631753	SRR11772379	PAIRED	cDNA	Homo sapiens	lung		9256540	29		0
PRJNA631753	SRR11772380	PAIRED	cDNA	Homo sapiens	lung		14472248	282		0
PRJNA631753	SRR11772381	PAIRED	cDNA	Homo sapiens	lung		15922832	167		0
PRJNA631753	SRR11772383	PAIRED	cDNA	Homo sapiens	lung		15726676	278	23	82.7338
PRJNA631753	SRR11772390	PAIRED	cDNA	Homo sapiens	lung		8559454	0		#DIV/0!
PRJNA631753	SRR11772391	PAIRED	cDNA	Homo sapiens	lung		10000138	0		#DIV/0!
PRJNA631753	SRR11772392	PAIRED	cDNA	Homo sapiens	lung		9051240	0		#DIV/0!
PRJNA631753	SRR11772393	PAIRED	cDNA	Homo sapiens	lung		8659950	2		0
PRJNA631753	SRR11772394	PAIRED	cDNA	Homo sapiens	lung		7484930	0		#DIV/0!
PRJNA631753	SRR12340057	PAIRED	cDNA	Homo sapiens	liver		16467716	0		#DIV/0!
PRJNA631753	SRR12340058	PAIRED	cDNA	Homo sapiens	lung		15838446	15		0
PRJNA631753	SRR12340059	PAIRED	cDNA	Homo sapiens	lung		19350838	56		0
PRJNA631753	SRR12340060	PAIRED	cDNA	Homo sapiens	lung		13303702	11		0
PRJNA631753	SRR12340061	PAIRED	cDNA	Homo sapiens	bowel		16254430	39		0
PRJNA631753	SRR12340062	PAIRED	cDNA	Homo sapiens	kidney		11897194	2		0
PRJNA631753	SRR12340065	PAIRED	cDNA	Homo sapiens	lung		20621112	133		0
PRJNA631753	SRR12340066	PAIRED	cDNA	Homo sapiens	liver		19333962	0		#DIV/0!
PRJNA631753	SRR12340067	PAIRED	cDNA	Homo sapiens	liver		17314372	0		#DIV/0!
PRJNA631753	SRR12340068	PAIRED	cDNA	Homo sapiens	lung		18806578	1		0
PRJNA631753	SRR12340069	PAIRED	cDNA	Homo sapiens	lung		16418784	1		0
PRJNA631753	SRR12340070	PAIRED	cDNA	Homo sapiens	lung		18992804	0		#DIV/0!
PRJNA631753	SRR12340071	PAIRED	cDNA	Homo sapiens	lung		17870606	2		0
PRJNA631753	SRR12340072	PAIRED	cDNA	Homo sapiens	lung		19730026	2		0
PRJNA631753	SRR12340073	PAIRED	cDNA	Homo sapiens	lung		24533278	7		0
PRJNA631753	SRR12340074	PAIRED	cDNA	Homo sapiens	lung		16369304	24		0
PRJNA631753	SRR12340075	PAIRED	cDNA	Homo sapiens	lung		15426006	13		0
PRJNA631753	SRR12340076	PAIRED	cDNA	Homo sapiens	lung		14801288	0		#DIV/0!
PRJNA631753	SRR12340078	PAIRED	cDNA	Homo sapiens	bowel		12247364	12		0
PRJNA631753	SRR12340079	PAIRED	cDNA	Homo sapiens	heart		14783402	39		0
PRJNA631753	SRR12340080	PAIRED	cDNA	Homo sapiens	liver		13055510	0		#DIV/0!
PRJNA631753	SRR12340082	PAIRED	cDNA	Homo sapiens	lung		15783364	9		0
PRJNA631753	SRR12340085	PAIRED	cDNA	Homo sapiens	lung		15654272	21		0
PRJNA631753	SRR12340092	PAIRED	cDNA	Homo sapiens	lung		16056880	4		0
PRJNA631753	SRR12340093	PAIRED	cDNA	Homo sapiens	lung		16766640	78096	26	0.332924
PRJNA631753	SRR12340094	PAIRED	cDNA	Homo sapiens	lung		16384166	19873	4	0.201278
PRJNA631753	SRR12340095	PAIRED	cDNA	Homo sapiens	lung		12290192	60167	10	0.166204
PRJNA631753	SRR12340096	PAIRED	cDNA	Homo sapiens	lung		9427208	2		0
PRJNA631753	SRR12340097	PAIRED	cDNA	Homo sapiens	lung		9618886	10		0
PRJNA631753	SRR12340098	PAIRED	cDNA	Homo sapiens	lung		7654964	0		#DIV/0!
PRJNA631753	SRR12340099	PAIRED	cDNA	Homo sapiens	lung		8208672	0		#DIV/0!
PRJNA631753	SRR12340100	PAIRED	cDNA	Homo sapiens	lung		10082046	5		0
PRJNA631753	SRR12340101	PAIRED	cDNA	Homo sapiens	placenta		13352018	86		0
PRJNA631753	SRR12340102	PAIRED	cDNA	Homo sapiens	placenta		16801284	121972	112	0.918244
PRJNA631753	SRR12340103	PAIRED	cDNA	Homo sapiens	placenta		17955634	0		#DIV/0!
PRJNA631753	SRR12340104	PAIRED	cDNA	Homo sapiens	placenta		14854988	0		#DIV/0!
PRJNA631753	SRR12340105	PAIRED	cDNA	Homo sapiens	placenta		14543144	0		#DIV/0!
PRJNA631753	SRR12340106	PAIRED	cDNA	Homo sapiens	placenta		18337902	0		#DIV/0!
PRJNA631753	SRR12340107	PAIRED	cDNA	Homo sapiens	placenta		17275648	0		#DIV/0!
PRJNA631753	SRR11772392	PAIRED	cDNA	Homo sapiens			4578493	0	0	#DIV/0!
PRJNA631753	SRR11772393	PAIRED	cDNA	Homo sapiens			4429940	0	0	#DIV/0!
PRJNA631753	SRR11772394	PAIRED	cDNA	Homo sapiens			3812833	0	0	#DIV/0!
PRJNA635934	SRR11878607	PAIRED	RANDOM	Vesicular stomatitis virus		M619_I7895_Cell_culture_Whelan_Cell_Culture_RNA_TruSeq-AD022_CGTACGTA_S9_L001_R2_001.fastq	1118068	17828	0	0
PRJNA636446	SRR11903406	PAIRED	cDNA	Severe acute respiratory syndrome coronavirus 2		Wuhan1-RN-R2.fastq	18	79	0	0
PRJNA636446	SRR11903414	PAIRED	cDNA	Severe acute respiratory syndrome coronavirus 2		Iran1-RN-R2.fastq	30582	60542	0	0
PRJNA610428	SRR11939535	PAIRED	unspecified	Severe acute respiratory syndrome coronavirus 2		WA-UW-4585_R2.fastq	443691	207458	0	0
PRJNA610428	SRR11939536	PAIRED	unspecified	Severe acute respiratory syndrome coronavirus 2		WA-UW-4581_R2.fastq	603417	67210	0	0
PRJNA610428	SRR11939537	PAIRED	unspecified	Severe acute respiratory syndrome coronavirus 2		WA-UW-4572_R2.fastq	356197	109192	0	0
PRJNA610428	SRR11939538	PAIRED	unspecified	Severe acute respiratory syndrome coronavirus 2		WA-UW-4570_R2.fastq	288746	70242	0	0
PRJNA610428	SRR11939539	PAIRED	unspecified	Severe acute respiratory syndrome coronavirus 2		WA-UW-4569_R2.fastq	325327	139302	0	0
PRJNA610428	SRR11939540	PAIRED	unspecified	Severe acute respiratory syndrome coronavirus 2		WA-UW-4563_R2.fastq	362815	134194	0	0
PRJNA610428	SRR11939541	PAIRED	unspecified	Severe acute respiratory syndrome coronavirus 2		WA-UW-4646_R2.fastq	515652	6928	0	0
PRJNA610428	SRR11939542	PAIRED	unspecified	Severe acute respiratory syndrome coronavirus 2		WA-UW-4562_R2.fastq	182222	112329	0	0
PRJNA610428	SRR11939543	PAIRED	unspecified	Severe acute respiratory syndrome coronavirus 2		WA-UW-4643_R2.fastq	385410	21864	0	0
PRJNA610428	SRR11939544	PAIRED	unspecified	Severe acute respiratory syndrome coronavirus 2		WA-UW-4633_R2.fastq	377855	112080	0	0
PRJNA610428	SRR11939545	PAIRED	unspecified	Severe acute respiratory syndrome coronavirus 2		WA-UW-4632_R2.fastq	345328	6529	0	0
PRJNA610428	SRR11939546	PAIRED	unspecified	Severe acute respiratory syndrome coronavirus 2		WA-UW-4623_R2.fastq	367917	98849	0	0
PRJNA610428	SRR11939547	PAIRED	unspecified	Severe acute respiratory syndrome coronavirus 2		WA-UW-4620_R2.fastq	306259	123390	0	0
PRJNA610428	SRR11939548	PAIRED	unspecified	Severe acute respiratory syndrome coronavirus 2		WA-UW-4619_R2.fastq	604194	7456	0	0
PRJNA610428	SRR11939549	PAIRED	unspecified	Severe acute respiratory syndrome coronavirus 2		WA-UW-4618_R2.fastq	281796	62634	0	0
PRJNA610428	SRR11939550	PAIRED	unspecified	Severe acute respiratory syndrome coronavirus 2		WA-UW-4616_R2.fastq	267260	105589	0	0
PRJNA610428	SRR11939551	PAIRED	unspecified	Severe acute respiratory syndrome coronavirus 2		WA-UW-4615_R2.fastq	316586	96008	0	0
PRJNA610428	SRR11939552	PAIRED	unspecified	Severe acute respiratory syndrome coronavirus 2		WA-UW-4614_R2.fastq	254300	114455	0	0
PRJNA610428	SRR11939553	PAIRED	unspecified	Severe acute respiratory syndrome coronavirus 2		WA-UW-4555_R2.fastq	440254	9253	0	0
PRJNA610428	SRR11939554	PAIRED	unspecified	Severe acute respiratory syndrome coronavirus 2		WA-UW-4608_R2.fastq	459568	186331	0	0
PRJNA610428	SRR11939555	PAIRED	unspecified	Severe acute respiratory syndrome coronavirus 2		WA-UW-4603_R2.fastq	365525	81984	0	0
PRJNA610428	SRR11939556	PAIRED	unspecified	Severe acute respiratory syndrome coronavirus 2		ID-UW-4601_R2.fastq	524213	102786	0	0
PRJNA610428	SRR11939557	PAIRED	unspecified	Severe acute respiratory syndrome coronavirus 2		ID-UW-4600_R2.fastq	687359	27822	0	0
PRJNA610428	SRR11939558	PAIRED	unspecified	Severe acute respiratory syndrome coronavirus 2		WA-UW-4599_R2.fastq	393343	129860	0	0
PRJNA610428	SRR11939559	PAIRED	unspecified	Severe acute respiratory syndrome coronavirus 2		ID-UW-4597_R2.fastq	169673	107173	0	0
PRJNA610428	SRR11939560	PAIRED	unspecified	Severe acute respiratory syndrome coronavirus 2		WA-UW-4592_R2.fastq	338869	125579	0	0
PRJNA610428	SRR11939561	PAIRED	unspecified	Severe acute respiratory syndrome coronavirus 2		WA-UW-4591_R2.fastq	579836	21809	0	0
PRJNA610428	SRR11939562	PAIRED	unspecified	Severe acute respiratory syndrome coronavirus 2		WA-UW-4589_R2.fastq	793613	352675	0	0
PRJNA610428	SRR11939563	PAIRED	unspecified	Severe acute respiratory syndrome coronavirus 2		WA-UW-4588_R2.fastq	531842	23502	0	0
PRJNA610428	SRR11939564	PAIRED	unspecified	Severe acute respiratory syndrome coronavirus 2		ID-UW-4550_R2.fastq	319231	41833	0	0
PRJNA610428	SRR11939565	PAIRED	unspecified	Severe acute respiratory syndrome coronavirus 2		WA-UW-4545_R2.fastq	433113	28837	0	0
PRJNA610428	SRR11939921	PAIRED	unspecified	Severe acute respiratory syndrome coronavirus 2		WA-UW-4684_R2.fastq	349878	8383	0	0
PRJNA610428	SRR11939932	PAIRED	unspecified	Severe acute respiratory syndrome coronavirus 2		WA-UW-4664_R2.fastq	339530	13258	0	0
PRJNA610428	SRR11939943	PAIRED	unspecified	Severe acute respiratory syndrome coronavirus 2		WA-UW-4663_R2.fastq	268944	19900	0	0
PRJNA610428	SRR11939952	PAIRED	unspecified	Severe acute respiratory syndrome coronavirus 2		WA-UW-4765_R2.fastq	183898	27906	0	0
PRJNA610428	SRR11939963	PAIRED	unspecified	Severe acute respiratory syndrome coronavirus 2		WA-UW-4758_R2.fastq	180372	26157	0	0
PRJNA610428	SRR11939974	PAIRED	unspecified	Severe acute respiratory syndrome coronavirus 2		WA-UW-4698_R2.fastq	238995	95048	0	0
PRJNA610428	SRR11939985	PAIRED	unspecified	Severe acute respiratory syndrome coronavirus 2		WA-UW-4931_R2.fastq	975729	24774	0	0
PRJNA610428	SRR11939996	PAIRED	unspecified	Severe acute respiratory syndrome coronavirus 2		WA-UW-4917_R2.fastq	1047518	9001	0	0
PRJNA610428	SRR11940009	PAIRED	unspecified	Severe acute respiratory syndrome coronavirus 2		WA-UW-4660_R2.fastq	282690	33321	0	0
PRJNA610428	SRR11940010	PAIRED	unspecified	Severe acute respiratory syndrome coronavirus 2		WA-UW-4657_R2.fastq	219255	39940	0	0
PRJNA644357	SRR12153163	PAIRED	cDNA	Severe acute respiratory syndrome coronavirus 2		SARS2_virion_Frameshift_2_sequence.fastq	705120	1316077	0	0
PRJNA644357	SRR12153164	PAIRED	cDNA	Severe acute respiratory syndrome coronavirus 2		RE_SARS2_frameshift_2p5DMS_2_sequence.fastq	82983	154793	0	0
PRJNA644357	SRR12153165	PAIRED	cDNA	Severe acute respiratory syndrome coronavirus 2		SARS2_smallF_vitro_2p5DMS_2_sequence.fastq	3150460	853	0	0
PRJNA639591	SRR12159823	PAIRED	RANDOM	Severe acute respiratory syndrome coronavirus 2		IGI-0045-H3.R2.fastq	235344	413319	0	0
PRJNA639591	SRR12159824	PAIRED	RANDOM	Severe acute respiratory syndrome coronavirus 2		IGI-0006-A7.R2.fastq	86663	120426	0	0
PRJNA639591	SRR12159825	PAIRED	RANDOM	Severe acute respiratory syndrome coronavirus 2		IGI-0017-C4.R2.fastq	44616	66085	0	0
PRJNA639591	SRR12159826	PAIRED	RANDOM	Severe acute respiratory syndrome coronavirus 2		IGI-0031-E7.R2.fastq	254375	394184	0	0
PRJNA639591	SRR12159827	PAIRED	RANDOM	Severe acute respiratory syndrome coronavirus 2		IGI-0042-G6.R2.fastq	120434	146729	0	0
PRJNA630716	SRR12216745	PAIRED	cDNA	Severe acute respiratory syndrome coronavirus 2		virion.calu3.R2.fastq	4336710	955381	42	0.0439615
PRJNA633853	SRR12334868	PAIRED	RANDOM	human metagenome		RR057e_00168_I18_S281_48462_reads_nh_R1.fastq	214966	0	0	#DIV/0!
PRJNA633853	SRR12334869	PAIRED	RANDOM	human metagenome		RR057e_00165_L07_S108_50479_reads_nh_R1.fastq	35891	0	0	#DIV/0!
PRJNA633853	SRR12334870	PAIRED	RANDOM	human metagenome			999325	0	0	#DIV/0!
PRJNA633853	SRR12334871	PAIRED	RANDOM	human metagenome			999669	6	0	0
PRJNA633853	SRR12334872	PAIRED	RANDOM	human metagenome			998685	0	0	#DIV/0!
PRJNA633853	SRR12334873	PAIRED	RANDOM	human metagenome		RR057e_00145_H07_S104_50475_reads_nh_R1.fastq	800108	0	0	#DIV/0!
PRJNA633853	SRR12334874	PAIRED	RANDOM	human metagenome			999978	0	0	#DIV/0!
PRJNA633853	SRR12334875	PAIRED	RANDOM	human metagenome		RR057e_00142_M16_S253_48458_reads_nh_R1.fastq	822453	0	0	#DIV/0!
PRJNA633853	SRR12334876	PAIRED	RANDOM	human metagenome		RR057e_00140_K16_S251_48457_reads_nh_R1.fastq	347475	0	0	#DIV/0!
PRJNA633853	SRR12334877	PAIRED	RANDOM	human metagenome		RR057e_00138_F07_S102_50473_reads_nh_R1.fastq	168914	0	0	#DIV/0!
PRJNA633853	SRR12334878	PAIRED	RANDOM	human metagenome		RR057e_00047_H03_S40_50463_reads_nh_R1.fastq	999710	0	0	#DIV/0!
PRJNA633853	SRR12334879	PAIRED	RANDOM	human metagenome			999811	0	0	#DIV/0!
PRJNA633853	SRR12334880	PAIRED	RANDOM	human metagenome		RR057e_00134_L05_S76_50472_reads_nh_R1.fastq	411719	0	0	#DIV/0!
PRJNA633853	SRR12334881	PAIRED	RANDOM	human metagenome		RR057e_00133_J05_S74_50471_reads_nh_R1.fastq	996645	0	0	#DIV/0!
PRJNA633853	SRR12334882	PAIRED	RANDOM	human metagenome		RR_water_ntc_SEQ003_O22_S351_48688_reads_nh_R1.fastq	35264	2	0	0
PRJNA633853	SRR12334883	PAIRED	RANDOM	human metagenome			28910	0	0	#DIV/0!
PRJNA633853	SRR12334884	PAIRED	RANDOM	human metagenome			29159	0	0	#DIV/0!
PRJNA633853	SRR12334885	PAIRED	RANDOM	human metagenome		RR_water_ntc_SEQ003_O16_S255_48685_reads_nh_R1.fastq	34710	2	0	0
PRJNA633853	SRR12334886	PAIRED	RANDOM	human metagenome			33455	0	0	#DIV/0!
PRJNA633853	SRR12334887	PAIRED	RANDOM	human metagenome		RR_water_ntc_SEQ003_O12_S191_48683_reads_nh_R1.fastq	28237	3	0	0
PRJNA633853	SRR12334888	PAIRED	RANDOM	human metagenome			34735	0	0	#DIV/0!
PRJNA633853	SRR12334889	PAIRED	RANDOM	human metagenome			41095	0	0	#DIV/0!
PRJNA633853	SRR12334890	PAIRED	RANDOM	human metagenome			25735	0	0	#DIV/0!
PRJNA633853	SRR12334891	PAIRED	RANDOM	human metagenome			999969	0	0	#DIV/0!
PRJNA633853	SRR12334892	PAIRED	RANDOM	human metagenome		RR_water_ntc_SEQ000AOP_O22_S351_50563_reads_nh_R1.fastq	115971	0	0	#DIV/0!
PRJNA633853	SRR12334893	PAIRED	RANDOM	human metagenome		RR_water_ntc_SEQ000AOP_B17_S258_50562_reads_nh_R1.fastq	100607	8	0	0
PRJNA633853	SRR12334894	PAIRED	RANDOM	human metagenome			34723	0	0	#DIV/0!
PRJNA633853	SRR12334895	PAIRED	RANDOM	human metagenome		RR_hela7_0-025pg_SEQ000AOP_O20_S319_50561_reads_nh_R1.fastq	115791	4	0	0
PRJNA633853	SRR12334896	PAIRED	RANDOM	human metagenome		RR_hela7_0-025pg_SEQ000AOP_B15_S226_50560_reads_nh_R1.fastq	134009	15	0	0
PRJNA633853	SRR12334897	PAIRED	RANDOM	human metagenome		RR_hela6_0-25pg_SEQ003_B13_S194_48678_reads_nh_R1.fastq	31824	0	0	#DIV/0!
PRJNA633853	SRR12334898	PAIRED	RANDOM	human metagenome		RR_hela6_0-25pg_SEQ000AOP_O18_S287_50559_reads_nh_R1.fastq	161794	6	0	0
PRJNA633853	SRR12334899	PAIRED	RANDOM	human metagenome		RR_hela6_0-25pg_SEQ000AOP_B13_S194_50558_reads_nh_R1.fastq	96016	6	0	0
PRJNA633853	SRR12334900	PAIRED	RANDOM	human metagenome			22415	0	0	#DIV/0!
PRJNA633853	SRR12334901	PAIRED	RANDOM	human metagenome		RR_hela5_2-5pg_SEQ000AOP_O16_S255_50557_reads_nh_R1.fastq	141486	4	0	0
PRJNA633853	SRR12334902	PAIRED	RANDOM	human metagenome			999613	0	0	#DIV/0!
PRJNA633853	SRR12334903	PAIRED	RANDOM	human metagenome		RR_hela5_2-5pg_SEQ000AOP_B11_S162_50556_reads_nh_R1.fastq	159686	4	0	0
PRJNA633853	SRR12334904	PAIRED	RANDOM	human metagenome			32625	0	0	#DIV/0!
PRJNA633853	SRR12334905	PAIRED	RANDOM	human metagenome		RR_hela4_25pg_SEQ000AOP_O14_S223_50555_reads_nh_R1.fastq	94866	2	0	0
PRJNA633853	SRR12334906	PAIRED	RANDOM	human metagenome		RR_hela4_25pg_SEQ000AOP_B09_S130_50554_reads_nh_R1.fastq	130436	7	0	0
PRJNA633853	SRR12334907	PAIRED	RANDOM	human metagenome			4503	0	0	#DIV/0!
PRJNA633853	SRR12334908	PAIRED	RANDOM	human metagenome		RR_hela3_250pg_SEQ000AOP_O12_S191_50553_reads_nh_R1.fastq	89125	13	0	0
PRJNA633853	SRR12334909	PAIRED	RANDOM	human metagenome		RR_hela3_250pg_SEQ000AOP_B07_S98_50552_reads_nh_R1.fastq	111840	7	0	0
PRJNA633853	SRR12334910	PAIRED	RANDOM	human metagenome		RR_hela2_2-5ng_SEQ003_B05_S66_48674_reads_nh_R1.fastq	24495	2	0	0
PRJNA633853	SRR12334911	PAIRED	RANDOM	human metagenome		RR_hela2_2-5ng_SEQ000AOP_O10_S159_50551_reads_nh_R1.fastq	69363	8	0	0
PRJNA633853	SRR12334912	PAIRED	RANDOM	human metagenome		RR_hela2_2-5ng_SEQ000AOP_B05_S66_50550_reads_nh_R1.fastq	41230	2	0	0
PRJNA633853	SRR12334913	PAIRED	RANDOM	human metagenome		RR057e_00119_L03_S44_50470_reads_nh_R1.fastq	999500	0	0	#DIV/0!
PRJNA633853	SRR12334914	PAIRED	RANDOM	human metagenome		RR_hela1_25ng_SEQ003_B03_S34_48673_reads_nh_R1.fastq	28990	7	0	0
PRJNA633853	SRR12334915	PAIRED	RANDOM	human metagenome		RR_hela1_25ng_SEQ000AOP_O08_S127_50549_reads_nh_R1.fastq	92069	10	0	0
PRJNA633853	SRR12334916	PAIRED	RANDOM	human metagenome		RR_hela1_25ng_SEQ000AOP_B03_S34_50548_reads_nh_R1.fastq	16149	0	0	#DIV/0!
PRJNA633853	SRR12334917	PAIRED	RANDOM	human metagenome		RR057i_00180_N21_S334_48672_reads_nh_R1.fastq	95872	4	0	0
PRJNA633853	SRR12334918	PAIRED	RANDOM	human metagenome			7285	0	0	#DIV/0!
PRJNA633853	SRR12334919	PAIRED	RANDOM	human metagenome			45069	0	0	#DIV/0!
PRJNA633853	SRR12334920	PAIRED	RANDOM	human metagenome		RR057i_00176_F21_S326_48668_reads_nh_R1.fastq	34545	2	0	0
PRJNA633853	SRR12334921	PAIRED	RANDOM	human metagenome			5459	0	0	#DIV/0!
PRJNA633853	SRR12334922	PAIRED	RANDOM	human metagenome		RR057i_00173_L19_S300_48665_reads_nh_R1.fastq	122453	2	0	0
PRJNA633853	SRR12334923	PAIRED	RANDOM	human metagenome		RR057i_00172_J19_S298_48664_reads_nh_R1.fastq	61066	42	0	0
PRJNA633853	SRR12334924	PAIRED	RANDOM	human metagenome		RR057e_00117_N03_S46_50469_reads_nh_R1.fastq	998400	0	0	#DIV/0!
PRJNA633853	SRR12334925	PAIRED	RANDOM	human metagenome		RR057i_00171_H19_S296_48663_reads_nh_R1.fastq	63520	1221	0	0
PRJNA633853	SRR12334926	PAIRED	RANDOM	human metagenome			36388	0	0	#DIV/0!
PRJNA633853	SRR12334927	PAIRED	RANDOM	human metagenome		RR057i_00169_D19_S292_48661_reads_nh_R1.fastq	10729	167	0	0
PRJNA633853	SRR12334928	PAIRED	RANDOM	human metagenome		RR057i_00168_N17_S270_48660_reads_nh_R1.fastq	33584	2	0	0
PRJNA633853	SRR12334929	PAIRED	RANDOM	human metagenome		RR057i_00167_L17_S268_48659_reads_nh_R1.fastq	998999	5333	0	0
PRJNA633853	SRR12334930	PAIRED	RANDOM	human metagenome			31670	0	0	#DIV/0!
PRJNA633853	SRR12334931	PAIRED	RANDOM	human metagenome		RR057i_00165_H17_S264_48657_reads_nh_R1.fastq	70914	273	0	0
PRJNA633853	SRR12334932	PAIRED	RANDOM	human metagenome		RR057i_00163_D17_S260_48655_reads_nh_R1.fastq	22030	294	0	0
PRJNA633853	SRR12334933	PAIRED	RANDOM	human metagenome		RR057i_00158_F15_S230_48650_reads_nh_R1.fastq	75561	22757	0	0
PRJNA633853	SRR12334934	PAIRED	RANDOM	human metagenome		RR057i_00157_D15_S228_48649_reads_nh_R1.fastq	999980	1884675	3	0.00159179
PRJNA633853	SRR12334935	PAIRED	RANDOM	human metagenome			560706	0	0	#DIV/0!
PRJNA633853	SRR12334936	PAIRED	RANDOM	human metagenome		RR057i_00156_N13_S206_48648_reads_nh_R1.fastq	75644	29133	0	0
PRJNA633853	SRR12334937	PAIRED	RANDOM	human metagenome		RR057i_00154_J13_S202_48646_reads_nh_R1.fastq	24297	26840	0	0
PRJNA633853	SRR12334938	PAIRED	RANDOM	human metagenome		RR057i_00151_D13_S196_48643_reads_nh_R1.fastq	84142	4922	0	0
PRJNA633853	SRR12334939	PAIRED	RANDOM	human metagenome		RR057i_00149_L11_S172_48641_reads_nh_R1.fastq	6035	10	0	0
PRJNA633853	SRR12334940	PAIRED	RANDOM	human metagenome		RR057i_00147_H11_S168_48639_reads_nh_R1.fastq	667192	596679	0	0
PRJNA633853	SRR12334941	PAIRED	RANDOM	human metagenome		RR057i_00145_D11_S164_48637_reads_nh_R1.fastq	999822	88387	0	0
PRJNA633853	SRR12334942	PAIRED	RANDOM	human metagenome		RR057i_00141_H09_S136_48633_reads_nh_R1.fastq	42911	7422	0	0
PRJNA633853	SRR12334943	PAIRED	RANDOM	human metagenome		RR057i_00139_D09_S132_48631_reads_nh_R1.fastq	101295	138941	1	0.0071973
PRJNA633853	SRR12334944	PAIRED	RANDOM	human metagenome		RR057i_00138_N07_S110_48630_reads_nh_R1.fastq	999980	1836131	1	0.000544623
PRJNA633853	SRR12334945	PAIRED	RANDOM	human metagenome		RR057i_00137_L07_S108_48629_reads_nh_R1.fastq	252685	405111	5	0.0123423
PRJNA633853	SRR12334946	PAIRED	RANDOM	human metagenome			931934	0	0	#DIV/0!
PRJNA633853	SRR12334947	PAIRED	RANDOM	human metagenome		RR057i_00136_J07_S106_48628_reads_nh_R1.fastq	999541	1778791	0	0
PRJNA633853	SRR12334948	PAIRED	RANDOM	human metagenome		RR057i_00135_H07_S104_48627_reads_nh_R1.fastq	4950	201	0	0
PRJNA633853	SRR12334949	PAIRED	RANDOM	human metagenome		RR057i_00134_F07_S102_48626_reads_nh_R1.fastq	220846	815	0	0
PRJNA633853	SRR12334950	PAIRED	RANDOM	human metagenome		RR057i_00133_D07_S100_48625_reads_nh_R1.fastq	999854	1898305	2	0.00105357
PRJNA633853	SRR12334951	PAIRED	RANDOM	human metagenome		RR057i_00132_N05_S78_48624_reads_nh_R1.fastq	11138	16	0	0
PRJNA633853	SRR12334952	PAIRED	RANDOM	human metagenome			10579	0	0	#DIV/0!
PRJNA633853	SRR12334953	PAIRED	RANDOM	human metagenome		RR057i_00123_H03_S40_48615_reads_nh_R1.fastq	66526	30	0	0
PRJNA633853	SRR12334954	PAIRED	RANDOM	human metagenome		RR057i_00122_F03_S38_48614_reads_nh_R1.fastq	103685	174393	0	0
PRJNA633853	SRR12334955	PAIRED	RANDOM	human metagenome		RR057i_00121_D03_S36_48613_reads_nh_R1.fastq	203114	109	0	0
PRJNA633853	SRR12334956	PAIRED	RANDOM	human metagenome			999968	0	0	#DIV/0!
PRJNA633853	SRR12334957	PAIRED	RANDOM	human metagenome			999547	0	0	#DIV/0!
PRJNA633853	SRR12334958	PAIRED	RANDOM	human metagenome		RR057e_00042_D03_S36_50462_reads_nh_R1.fastq	268493	0	0	#DIV/0!
PRJNA633853	SRR12334959	PAIRED	RANDOM	human metagenome		RR057i_00119_K21_S331_48611_reads_nh_R1.fastq	76897	2	0	0
PRJNA633853	SRR12334960	PAIRED	RANDOM	human metagenome		RR057i_00118_I21_S329_48610_reads_nh_R1.fastq	62674	2	0	0
PRJNA633853	SRR12334961	PAIRED	RANDOM	human metagenome		RR057i_00117_G21_S327_48609_reads_nh_R1.fastq	99275	4	0	0
PRJNA633853	SRR12334962	PAIRED	RANDOM	human metagenome			67403	0	0	#DIV/0!
PRJNA633853	SRR12334963	PAIRED	RANDOM	human metagenome			14025	0	0	#DIV/0!
PRJNA633853	SRR12334964	PAIRED	RANDOM	human metagenome		RR057i_00114_M19_S301_48606_reads_nh_R1.fastq	31694	9874	0	0
PRJNA633853	SRR12334965	PAIRED	RANDOM	human metagenome		RR057i_00112_I19_S297_48604_reads_nh_R1.fastq	179082	3388	0	0
PRJNA633853	SRR12334966	PAIRED	RANDOM	human metagenome		RR057i_00110_E19_S293_48602_reads_nh_R1.fastq	125272	5673	0	0
PRJNA633853	SRR12334967	PAIRED	RANDOM	human metagenome		RR057i_00109_C19_S291_48601_reads_nh_R1.fastq	10642	3494	0	0
PRJNA633853	SRR12334968	PAIRED	RANDOM	human metagenome		RR057i_00108_M17_S269_48600_reads_nh_R1.fastq	999901	143003	0	0
PRJNA633853	SRR12334969	PAIRED	RANDOM	human metagenome			999708	0	0	#DIV/0!
PRJNA633853	SRR12334970	PAIRED	RANDOM	human metagenome		RR057i_00106_I17_S265_48598_reads_nh_R1.fastq	999947	127	0	0
PRJNA633853	SRR12334971	PAIRED	RANDOM	human metagenome		RR057i_00104_E17_S261_48596_reads_nh_R1.fastq	999989	275229	0	0
PRJNA633853	SRR12334972	PAIRED	RANDOM	human metagenome		RR057i_00103_C17_S259_48595_reads_nh_R1.fastq	561083	881006	1	0.00113507
PRJNA633853	SRR12334973	PAIRED	RANDOM	human metagenome		RR057i_00101_K15_S235_48593_reads_nh_R1.fastq	21147	8678	0	0
PRJNA633853	SRR12334974	PAIRED	RANDOM	human metagenome		RR057i_00100_I15_S233_48592_reads_nh_R1.fastq	999872	402391	0	0
PRJNA633853	SRR12334975	PAIRED	RANDOM	human metagenome		RR057i_00099_G15_S231_48591_reads_nh_R1.fastq	999950	557	0	0
PRJNA633853	SRR12334976	PAIRED	RANDOM	human metagenome		RR057i_00098_E15_S229_48590_reads_nh_R1.fastq	999963	190312	1	0.00525453
PRJNA633853	SRR12334977	PAIRED	RANDOM	human metagenome		RR057i_00096_M13_S205_48588_reads_nh_R1.fastq	999736	11424	0	0
PRJNA633853	SRR12334978	PAIRED	RANDOM	human metagenome		RR057i_00095_K13_S203_48587_reads_nh_R1.fastq	999877	358681	3	0.00836398
PRJNA633853	SRR12334979	PAIRED	RANDOM	human metagenome		RR057i_00094_I13_S201_48586_reads_nh_R1.fastq	999972	2	0	0
PRJNA633853	SRR12334980	PAIRED	RANDOM	human metagenome			999906	0	0	#DIV/0!
PRJNA633853	SRR12334981	PAIRED	RANDOM	human metagenome		RR057i_00090_M11_S173_48582_reads_nh_R1.fastq	578731	19124	0	0
PRJNA633853	SRR12334982	PAIRED	RANDOM	human metagenome		RR057i_00089_K11_S171_48581_reads_nh_R1.fastq	999950	1725	0	0
PRJNA633853	SRR12334983	PAIRED	RANDOM	human metagenome		RR057i_00088_I11_S169_48580_reads_nh_R1.fastq	127572	109965	1	0.0090938
PRJNA633853	SRR12334984	PAIRED	RANDOM	human metagenome		RR057i_00086_E11_S165_48578_reads_nh_R1.fastq	85898	150870	0	0
PRJNA633853	SRR12334985	PAIRED	RANDOM	human metagenome		RR057i_00084_M09_S141_48576_reads_nh_R1.fastq	839848	1593505	3	0.00188264
PRJNA633853	SRR12334986	PAIRED	RANDOM	human metagenome		RR057i_00083_K09_S139_48575_reads_nh_R1.fastq	19857	2	0	0
PRJNA633853	SRR12334987	PAIRED	RANDOM	human metagenome		RR057i_00082_I09_S137_48574_reads_nh_R1.fastq	961084	106175	0	0
PRJNA633853	SRR12334988	PAIRED	RANDOM	human metagenome		RR057i_00081_G09_S135_48573_reads_nh_R1.fastq	267157	1070	0	0
PRJNA633853	SRR12334989	PAIRED	RANDOM	human metagenome		RR057i_00080_E09_S133_48572_reads_nh_R1.fastq	89218	84833	0	0
PRJNA633853	SRR12334990	PAIRED	RANDOM	human metagenome		RR057i_00078_M07_S109_48570_reads_nh_R1.fastq	191073	305406	0	0
PRJNA633853	SRR12334991	PAIRED	RANDOM	human metagenome		RR057e_00088_N20_S318_48447_reads_nh_R1.fastq	999792	0	0	#DIV/0!
PRJNA633853	SRR12334992	PAIRED	RANDOM	human metagenome		RR057i_00077_K07_S107_48569_reads_nh_R1.fastq	999930	1513081	0	0
PRJNA633853	SRR12334993	PAIRED	RANDOM	human metagenome		RR057i_00076_I07_S105_48568_reads_nh_R1.fastq	208845	14002	0	0
PRJNA633853	SRR12334994	PAIRED	RANDOM	human metagenome		RR057i_00075_G07_S103_48567_reads_nh_R1.fastq	220820	1356	0	0
PRJNA633853	SRR12334995	PAIRED	RANDOM	human metagenome		RR057i_00074_E07_S101_48566_reads_nh_R1.fastq	987539	763449	1	0.00130985
PRJNA633853	SRR12334996	PAIRED	RANDOM	human metagenome		RR057i_00072_M05_S77_48564_reads_nh_R1.fastq	655649	1205094	0	0
PRJNA633853	SRR12334997	PAIRED	RANDOM	human metagenome		RR057i_00071_K05_S75_48563_reads_nh_R1.fastq	999798	1734517	2	0.00115306
PRJNA633853	SRR12334998	PAIRED	RANDOM	human metagenome		RR057i_00070_I05_S73_48562_reads_nh_R1.fastq	120957	669	4	5.97907
PRJNA633853	SRR12334999	PAIRED	RANDOM	human metagenome		RR057i_00069_G05_S71_48561_reads_nh_R1.fastq	105524	172847	0	0
PRJNA633853	SRR12335000	PAIRED	RANDOM	human metagenome		RR057i_00068_E05_S69_48560_reads_nh_R1.fastq	18496	1698	0	0
PRJNA633853	SRR12335001	PAIRED	RANDOM	human metagenome		RR057i_00067_C05_S67_48559_reads_nh_R1.fastq	22693	15511	0	0
PRJNA633853	SRR12335002	PAIRED	RANDOM	human metagenome			999451	0	0	#DIV/0!
PRJNA633853	SRR12335003	PAIRED	RANDOM	human metagenome		RR057i_00064_I03_S41_48556_reads_nh_R1.fastq	2908	0	0	#DIV/0!
PRJNA633853	SRR12335004	PAIRED	RANDOM	human metagenome		RR057i_00062_E03_S37_48554_reads_nh_R1.fastq	88877	1546	0	0
PRJNA633853	SRR12335005	PAIRED	RANDOM	human metagenome		RR057e_00765_H16_S248_48550_reads_nh_R1.fastq	78015	0	0	#DIV/0!
PRJNA633853	SRR12335006	PAIRED	RANDOM	human metagenome			359709	0	0	#DIV/0!
PRJNA633853	SRR12335007	PAIRED	RANDOM	human metagenome			13370	0	0	#DIV/0!
PRJNA633853	SRR12335008	PAIRED	RANDOM	human metagenome			999616	0	0	#DIV/0!
PRJNA633853	SRR12335009	PAIRED	RANDOM	human metagenome		RR057e_00761_L14_S220_48546_reads_nh_R1.fastq	5436	4	0	0
PRJNA633853	SRR12335010	PAIRED	RANDOM	human metagenome		RR057e_00759_C12_S179_50547_reads_nh_R1.fastq	178645	2203	0	0
PRJNA633853	SRR12335011	PAIRED	RANDOM	human metagenome		RR057e_00757_M10_S157_50546_reads_nh_R1.fastq	44809	13751	0	0
PRJNA633853	SRR12335012	PAIRED	RANDOM	human metagenome		RR057e_00756_K10_S155_50545_reads_nh_R1.fastq	110333	66979	0	0
PRJNA633853	SRR12335013	PAIRED	RANDOM	human metagenome		RR057e_00084_H05_S72_50468_reads_nh_R1.fastq	994896	0	0	#DIV/0!
PRJNA633853	SRR12335014	PAIRED	RANDOM	human metagenome		RR057e_00755_I10_S153_50544_reads_nh_R1.fastq	60538	208	0	0
PRJNA633853	SRR12335015	PAIRED	RANDOM	human metagenome		RR057e_00754_E12_S181_50543_reads_nh_R1.fastq	997913	1027349	0	0
PRJNA633853	SRR12335016	PAIRED	RANDOM	human metagenome		RR057e_00753_G10_S151_50542_reads_nh_R1.fastq	85934	9716	0	0
PRJNA633853	SRR12335017	PAIRED	RANDOM	human metagenome		RR057e_00752_E10_S149_50541_reads_nh_R1.fastq	84839	10142	0	0
PRJNA633853	SRR12335018	PAIRED	RANDOM	human metagenome		RR057e_00751_C10_S147_50540_reads_nh_R1.fastq	995392	1053473	0	0
PRJNA633853	SRR12335019	PAIRED	RANDOM	human metagenome		RR057e_00750_J14_S218_48545_reads_nh_R1.fastq	999932	1806952	0	0
PRJNA633853	SRR12335020	PAIRED	RANDOM	human metagenome		RR057e_00749_H14_S216_48544_reads_nh_R1.fastq	11599	2124	0	0
PRJNA633853	SRR12335021	PAIRED	RANDOM	human metagenome		RR057e_00748_F14_S214_48543_reads_nh_R1.fastq	32822	1497	0	0
PRJNA633853	SRR12335022	PAIRED	RANDOM	human metagenome		RR057e_00747_D14_S212_48542_reads_nh_R1.fastq	37416	554	0	0
PRJNA633853	SRR12335023	PAIRED	RANDOM	human metagenome		RR057e_00746_N12_S190_48541_reads_nh_R1.fastq	999618	578013	0	0
PRJNA633853	SRR12335024	PAIRED	RANDOM	human metagenome			570741	0	0	#DIV/0!
PRJNA633853	SRR12335025	PAIRED	RANDOM	human metagenome		RR057e_00744_J12_S186_48539_reads_nh_R1.fastq	14082	8	0	0
PRJNA633853	SRR12335026	PAIRED	RANDOM	human metagenome		RR057e_00743_H12_S184_48538_reads_nh_R1.fastq	5267	7	0	0
PRJNA633853	SRR12335027	PAIRED	RANDOM	human metagenome		RR057e_00742_F12_S182_48537_reads_nh_R1.fastq	220766	2	0	0
PRJNA633853	SRR12335028	PAIRED	RANDOM	human metagenome		RR057e_00741_D12_S180_48536_reads_nh_R1.fastq	214470	18823	0	0
PRJNA633853	SRR12335029	PAIRED	RANDOM	human metagenome			231733	385531	0	0
PRJNA633853	SRR12335030	PAIRED	RANDOM	human metagenome		RR057e_00736_F10_S150_48531_reads_nh_R1.fastq	2472	920	0	0
PRJNA633853	SRR12335031	PAIRED	RANDOM	human metagenome		RR057e_00735_D10_S148_48530_reads_nh_R1.fastq	52714	4860	0	0
PRJNA633853	SRR12335032	PAIRED	RANDOM	human metagenome		RR057e_00733_L08_S124_48528_reads_nh_R1.fastq	38876	149	0	0
PRJNA633853	SRR12335033	PAIRED	RANDOM	human metagenome		RR057e_00731_H08_S120_48526_reads_nh_R1.fastq	999922	196258	0	0
PRJNA633853	SRR12335034	PAIRED	RANDOM	human metagenome		RR057e_00729_D08_S116_48524_reads_nh_R1.fastq	4928	1487	0	0
PRJNA633853	SRR12335035	PAIRED	RANDOM	human metagenome			999533	0	0	#DIV/0!
PRJNA633853	SRR12335036	PAIRED	RANDOM	human metagenome			41710	2003	0	0
PRJNA633853	SRR12335037	PAIRED	RANDOM	human metagenome		RR057e_00727_L06_S92_48522_reads_nh_R1.fastq	393741	645449	0	0
PRJNA633853	SRR12335038	PAIRED	RANDOM	human metagenome		RR057e_00726_J06_S90_48521_reads_nh_R1.fastq	27712	20529	0	0
PRJNA633853	SRR12335039	PAIRED	RANDOM	human metagenome		RR057e_00724_F06_S86_48519_reads_nh_R1.fastq	72667	10	0	0
PRJNA633853	SRR12335040	PAIRED	RANDOM	human metagenome		RR057e_00723_D06_S84_48518_reads_nh_R1.fastq	45250	2	0	0
PRJNA633853	SRR12335041	PAIRED	RANDOM	human metagenome		RR057e_00721_L04_S60_48516_reads_nh_R1.fastq	999928	931002	0	0
PRJNA633853	SRR12335042	PAIRED	RANDOM	human metagenome			999911	1379	0	0
PRJNA633853	SRR12335043	PAIRED	RANDOM	human metagenome		RR057e_00590_M06_S93_50539_reads_nh_R1.fastq	998614	0	0	#DIV/0!
PRJNA633853	SRR12335044	PAIRED	RANDOM	human metagenome		RR057e_00586_G04_S55_50538_reads_nh_R1.fastq	996944	0	0	#DIV/0!
PRJNA633853	SRR12335045	PAIRED	RANDOM	human metagenome		RR057e_00581_C08_S115_50536_reads_nh_R1.fastq	997381	0	0	#DIV/0!
PRJNA633853	SRR12335046	PAIRED	RANDOM	human metagenome			999857	0	0	#DIV/0!
PRJNA633853	SRR12335047	PAIRED	RANDOM	human metagenome		RR057e_00577_N21_S334_50535_reads_nh_R1.fastq	998017	0	0	#DIV/0!
PRJNA633853	SRR12335048	PAIRED	RANDOM	human metagenome		RR057e_00567_I06_S89_50534_reads_nh_R1.fastq	984626	0	0	#DIV/0!
PRJNA633853	SRR12335049	PAIRED	RANDOM	human metagenome		RR057e_00560_C06_S83_50533_reads_nh_R1.fastq	999296	0	0	#DIV/0!
PRJNA633853	SRR12335050	PAIRED	RANDOM	human metagenome		RR057e_00549_E04_S53_50532_reads_nh_R1.fastq	997943	0	0	#DIV/0!
PRJNA633853	SRR12335051	PAIRED	RANDOM	human metagenome		RR057e_00540_M08_S125_50531_reads_nh_R1.fastq	997161	0	0	#DIV/0!
PRJNA633853	SRR12335052	PAIRED	RANDOM	human metagenome		RR057e_00534_G08_S119_50530_reads_nh_R1.fastq	270662	0	0	#DIV/0!
PRJNA633853	SRR12335053	PAIRED	RANDOM	human metagenome			999251	0	0	#DIV/0!
PRJNA633853	SRR12335054	PAIRED	RANDOM	human metagenome		RR057e_00516_E06_S85_50526_reads_nh_R1.fastq	998384	0	0	#DIV/0!
PRJNA633853	SRR12335055	PAIRED	RANDOM	human metagenome		RR057e_00515_M04_S61_50525_reads_nh_R1.fastq	998517	0	0	#DIV/0!
PRJNA633853	SRR12335056	PAIRED	RANDOM	human metagenome			999291	0	0	#DIV/0!
PRJNA633853	SRR12335057	PAIRED	RANDOM	human metagenome			999959	0	0	#DIV/0!
PRJNA633853	SRR12335058	PAIRED	RANDOM	human metagenome		RR057e_00508_C04_S51_50523_reads_nh_R1.fastq	999408	0	0	#DIV/0!
PRJNA633853	SRR12335059	PAIRED	RANDOM	human metagenome			998658	0	0	#DIV/0!
PRJNA633853	SRR12335060	PAIRED	RANDOM	human metagenome		RR057e_00504_K06_S91_50521_reads_nh_R1.fastq	999404	0	0	#DIV/0!
PRJNA633853	SRR12335061	PAIRED	RANDOM	human metagenome		RR057e_00494_H17_S264_50520_reads_nh_R1.fastq	754173	0	0	#DIV/0!
PRJNA633853	SRR12335062	PAIRED	RANDOM	human metagenome		RR057e_00491_L15_S236_50519_reads_nh_R1.fastq	70773	0	0	#DIV/0!
PRJNA633853	SRR12335063	PAIRED	RANDOM	human metagenome		RR057e_00489_L19_S300_50517_reads_nh_R1.fastq	475228	0	0	#DIV/0!
PRJNA633853	SRR12335064	PAIRED	RANDOM	human metagenome		RR057e_00488_J19_S298_50516_reads_nh_R1.fastq	60657	0	0	#DIV/0!
PRJNA633853	SRR12335065	PAIRED	RANDOM	human metagenome		RR057e_00485_N17_S270_50514_reads_nh_R1.fastq	54700	0	0	#DIV/0!
PRJNA633853	SRR12335066	PAIRED	RANDOM	human metagenome		RR057e_00475_D17_S260_50513_reads_nh_R1.fastq	83588	0	0	#DIV/0!
PRJNA633853	SRR12335067	PAIRED	RANDOM	human metagenome		RR057e_00460_L17_S268_50511_reads_nh_R1.fastq	135019	0	0	#DIV/0!
PRJNA633853	SRR12335068	PAIRED	RANDOM	human metagenome			999466	0	0	#DIV/0!
PRJNA633853	SRR12335069	PAIRED	RANDOM	human metagenome			623004	0	0	#DIV/0!
PRJNA633853	SRR12335070	PAIRED	RANDOM	human metagenome		RR057e_00037_M22_S349_48434_reads_nh_R1.fastq	732395	0	0	#DIV/0!
PRJNA633853	SRR12335071	PAIRED	RANDOM	human metagenome		RR057e_00456_G12_S183_48510_reads_nh_R1.fastq	47253	0	0	#DIV/0!
PRJNA633853	SRR12335072	PAIRED	RANDOM	human metagenome			566133	0	0	#DIV/0!
PRJNA633853	SRR12335073	PAIRED	RANDOM	human metagenome		RR057e_00451_I10_S153_48505_reads_nh_R1.fastq	394062	0	0	#DIV/0!
PRJNA633853	SRR12335074	PAIRED	RANDOM	human metagenome		RR057e_00449_F21_S326_50509_reads_nh_R1.fastq	22027	0	0	#DIV/0!
PRJNA633853	SRR12335075	PAIRED	RANDOM	human metagenome			999726	0	0	#DIV/0!
PRJNA633853	SRR12335076	PAIRED	RANDOM	human metagenome		RR057e_00440_N15_S238_50508_reads_nh_R1.fastq	116362	0	0	#DIV/0!
PRJNA633853	SRR12335077	PAIRED	RANDOM	human metagenome		RR057e_00437_E10_S149_48503_reads_nh_R1.fastq	999922	0	0	#DIV/0!
PRJNA633853	SRR12335078	PAIRED	RANDOM	human metagenome		RR057e_00436_C10_S147_48502_reads_nh_R1.fastq	999909	0	0	#DIV/0!
PRJNA633853	SRR12335079	PAIRED	RANDOM	human metagenome		RR057e_00431_L21_S332_50506_reads_nh_R1.fastq	341690	0	0	#DIV/0!
PRJNA633853	SRR12335080	PAIRED	RANDOM	human metagenome			215950	0	0	#DIV/0!
PRJNA633853	SRR12335081	PAIRED	RANDOM	human metagenome		RR057e_00066_D05_S68_50467_reads_nh_R1.fastq	999209	0	0	#DIV/0!
PRJNA633853	SRR12335082	PAIRED	RANDOM	human metagenome		RR057e_00423_E08_S117_48497_reads_nh_R1.fastq	999860	0	0	#DIV/0!
PRJNA633853	SRR12335083	PAIRED	RANDOM	human metagenome		RR057e_00418_J21_S330_50504_reads_nh_R1.fastq	997525	0	0	#DIV/0!
PRJNA633853	SRR12335084	PAIRED	RANDOM	human metagenome		RR057e_00416_C08_S115_48496_reads_nh_R1.fastq	189783	0	0	#DIV/0!
PRJNA633853	SRR12335085	PAIRED	RANDOM	human metagenome		RR057e_00414_K06_S91_48494_reads_nh_R1.fastq	194442	0	0	#DIV/0!
PRJNA633853	SRR12335086	PAIRED	RANDOM	human metagenome		RR057e_00412_G06_S87_48492_reads_nh_R1.fastq	49222	0	0	#DIV/0!
PRJNA633853	SRR12335087	PAIRED	RANDOM	human metagenome		RR057e_00410_J17_S266_50502_reads_nh_R1.fastq	998559	0	0	#DIV/0!
PRJNA633853	SRR12335088	PAIRED	RANDOM	human metagenome			455104	0	0	#DIV/0!
PRJNA633853	SRR12335089	PAIRED	RANDOM	human metagenome		RR057e_00401_G04_S55_48486_reads_nh_R1.fastq	997751	0	0	#DIV/0!
PRJNA633853	SRR12335090	PAIRED	RANDOM	human metagenome		RR057e_00399_C04_S51_48484_reads_nh_R1.fastq	442062	0	0	#DIV/0!
PRJNA633853	SRR12335091	PAIRED	RANDOM	human metagenome		RR057e_00340_J15_S234_50501_reads_nh_R1.fastq	998680	0	0	#DIV/0!
PRJNA633853	SRR12335092	PAIRED	RANDOM	human metagenome		RR057e_00060_F03_S38_50466_reads_nh_R1.fastq	999582	0	0	#DIV/0!
PRJNA633853	SRR12335093	PAIRED	RANDOM	human metagenome		RR057e_00324_H15_S232_50500_reads_nh_R1.fastq	996588	0	0	#DIV/0!
PRJNA633853	SRR12335094	PAIRED	RANDOM	human metagenome		RR057e_00318_F15_S230_50499_reads_nh_R1.fastq	999276	0	0	#DIV/0!
PRJNA633853	SRR12335095	PAIRED	RANDOM	human metagenome		RR057e_00309_D15_S228_50498_reads_nh_R1.fastq	998478	0	0	#DIV/0!
PRJNA633853	SRR12335096	PAIRED	RANDOM	human metagenome			999912	0	0	#DIV/0!
PRJNA633853	SRR12335097	PAIRED	RANDOM	human metagenome		RR057e_00296_D13_S196_50497_reads_nh_R1.fastq	168335	0	0	#DIV/0!
PRJNA633853	SRR12335098	PAIRED	RANDOM	human metagenome		RR057e_00295_N13_S206_50496_reads_nh_R1.fastq	25625	0	0	#DIV/0!
PRJNA633853	SRR12335099	PAIRED	RANDOM	human metagenome		RR057e_00294_F13_S198_50495_reads_nh_R1.fastq	30224	0	0	#DIV/0!
PRJNA633853	SRR12335100	PAIRED	RANDOM	human metagenome			386888	5	0	0
PRJNA633853	SRR12335101	PAIRED	RANDOM	human metagenome			31847	17	0	0
PRJNA633853	SRR12335102	PAIRED	RANDOM	human metagenome			43751	15	0	0
PRJNA633853	SRR12335103	PAIRED	RANDOM	human metagenome			214945	0	0	#DIV/0!
PRJNA633853	SRR12335104	PAIRED	RANDOM	human metagenome			161485	14	0	0
PRJNA633853	SRR12335105	PAIRED	RANDOM	human metagenome			77615	4	0	0
PRJNA633853	SRR12335106	PAIRED	RANDOM	human metagenome			79552	0	0	#DIV/0!
PRJNA633853	SRR12335107	PAIRED	RANDOM	human metagenome			73771	0	0	#DIV/0!
PRJNA633853	SRR12335108	PAIRED	RANDOM	human metagenome			10654	0	0	#DIV/0!
PRJNA633853	SRR12335109	PAIRED	RANDOM	human metagenome			387318	2	0	0
PRJNA633853	SRR12335110	PAIRED	RANDOM	human metagenome			22640	402	0	0
PRJNA633853	SRR12335111	PAIRED	RANDOM	human metagenome			999796	0	0	#DIV/0!
PRJNA633853	SRR12335112	PAIRED	RANDOM	human metagenome			70146	11	0	0
PRJNA633853	SRR12335113	PAIRED	RANDOM	human metagenome			999368	0	0	#DIV/0!
PRJNA633853	SRR12335114	PAIRED	RANDOM	human metagenome			998320	0	0	#DIV/0!
PRJNA633853	SRR12335115	PAIRED	RANDOM	human metagenome			998466	4	0	0
PRJNA633853	SRR12335116	PAIRED	RANDOM	human metagenome			104519	10	0	0
PRJNA633853	SRR12335117	PAIRED	RANDOM	human metagenome			396773	8	0	0
PRJNA633853	SRR12335118	PAIRED	RANDOM	human metagenome			25606	2	0	0
PRJNA633853	SRR12335119	PAIRED	RANDOM	human metagenome			441352	14	0	0
PRJNA633853	SRR12335120	PAIRED	RANDOM	human metagenome			586347	8	0	0
PRJNA633853	SRR12335121	PAIRED	RANDOM	human metagenome			999359	0	0	#DIV/0!
PRJNA633853	SRR12335122	PAIRED	RANDOM	human metagenome			999937	0	0	#DIV/0!
PRJNA633853	SRR12335123	PAIRED	RANDOM	human metagenome			5776	0	0	#DIV/0!
PRJNA633853	SRR12335124	PAIRED	RANDOM	human metagenome			12950	2	0	0
PRJNA633853	SRR12335125	PAIRED	RANDOM	human metagenome			999130	4	0	0
PRJNA633853	SRR12335126	PAIRED	RANDOM	human metagenome			51443	0	0	#DIV/0!
PRJNA633853	SRR12335127	PAIRED	RANDOM	human metagenome			999516	0	0	#DIV/0!
PRJNA633853	SRR12335128	PAIRED	RANDOM	human metagenome			999230	0	0	#DIV/0!
PRJNA633853	SRR12335129	PAIRED	RANDOM	human metagenome			45228	0	0	#DIV/0!
PRJNA633853	SRR12335130	PAIRED	RANDOM	human metagenome			37949	2	0	0
PRJNA633853	SRR12335131	PAIRED	RANDOM	human metagenome			999343	2	0	0
PRJNA633853	SRR12335132	PAIRED	RANDOM	human metagenome			999655	0	0	#DIV/0!
PRJNA633853	SRR12335133	PAIRED	RANDOM	human metagenome			11982	0	0	#DIV/0!
PRJNA633853	SRR12335134	PAIRED	RANDOM	human metagenome			17235	6	0	0
PRJNA633853	SRR12335135	PAIRED	RANDOM	human metagenome			996690	7	0	0
PRJNA633853	SRR12335136	PAIRED	RANDOM	human metagenome			999951	0	0	#DIV/0!
PRJNA631753	SRR12340058	PAIRED	cDNA	Homo sapiens			8365546	13	0	0
PRJNA631753	SRR12340059	PAIRED	cDNA	Homo sapiens			10021137	67	0	0
PRJNA631753	SRR12340060	PAIRED	cDNA	Homo sapiens			6812567	17	0	0
PRJNA631753	SRR12340061	PAIRED	cDNA	Homo sapiens			8308192	76	0	0
PRJNA631753	SRR12340062	PAIRED	cDNA	Homo sapiens			6485815	3	0	0
PRJNA631753	SRR12340063	PAIRED	cDNA	Homo sapiens			8443691	48117	0	0
PRJNA631753	SRR12340064	PAIRED	cDNA	Homo sapiens			7712806	11461	0	0
PRJNA631753	SRR12340065	PAIRED	cDNA	Homo sapiens			10736320	835	0	0
PRJNA631753	SRR12340068	PAIRED	cDNA	Homo sapiens			9971782	14	0	0
PRJNA631753	SRR12340071	PAIRED	cDNA	Homo sapiens			9021210	2	5	2500
PRJNA631753	SRR12340073	PAIRED	cDNA	Homo sapiens			12400781	11	11	1000
PRJNA631753	SRR12340074	PAIRED	cDNA	Homo sapiens			8255582	115	0	0
PRJNA631753	SRR12340075	PAIRED	cDNA	Homo sapiens			7744733	17	0	0
PRJNA631753	SRR12340077	PAIRED	cDNA	Homo sapiens			8378746	859	0	0
PRJNA631753	SRR12340078	PAIRED	cDNA	Homo sapiens			6294147	12	0	0
PRJNA631753	SRR12340079	PAIRED	cDNA	Homo sapiens			8018849	73	0	0
PRJNA631753	SRR12340082	PAIRED	cDNA	Homo sapiens			8461411	146	23	157.534
PRJNA631753	SRR12340083	PAIRED	cDNA	Homo sapiens			10286613	15746	23	1.46069
PRJNA631753	SRR12340084	PAIRED	cDNA	Homo sapiens			8005978	3858	1	0.259202
PRJNA631753	SRR12340085	PAIRED	cDNA	Homo sapiens			7974006	70	0	0
PRJNA631753	SRR12340086	PAIRED	cDNA	Homo sapiens			9333643	30391	7	0.230331
PRJNA631753	SRR12340087	PAIRED	cDNA	Homo sapiens			7527528	103597	6	0.0579167
PRJNA631753	SRR12340088	PAIRED	cDNA	Homo sapiens			8291849	92681	24	0.258953
PRJNA631753	SRR12340089	PAIRED	cDNA	Homo sapiens			8664663	237401	46	0.193765
PRJNA631753	SRR12340090	PAIRED	cDNA	Homo sapiens			7564505	119348	18	0.150819
PRJNA631753	SRR12340091	PAIRED	cDNA	Homo sapiens			7914089	822	0	0
PRJNA631753	SRR12340092	PAIRED	cDNA	Homo sapiens			8107768	5	0	0
PRJNA631753	SRR12340093	PAIRED	cDNA	Homo sapiens			8521447	111272	28	0.251636
PRJNA631753	SRR12340094	PAIRED	cDNA	Homo sapiens			8289377	30920	4	0.129366
PRJNA631753	SRR12340095	PAIRED	cDNA	Homo sapiens			6284351	83803	11	0.13126
PRJNA631753	SRR12340096	PAIRED	cDNA	Homo sapiens			4740808	10	0	0
PRJNA631753	SRR12340097	PAIRED	cDNA	Homo sapiens			4947165	13	0	0
PRJNA631753	SRR12340100	PAIRED	cDNA	Homo sapiens			5230461	5	0	0
PRJNA631753	SRR12340101	PAIRED	cDNA	Homo sapiens			6714033	395	0	0
PRJNA650245	SRR12379496	PAIRED	Inverse rRNA	Severe acute respiratory syndrome coronavirus 2		BS05794A_R2.fastq	1969360	2881487	52	0.0180462
PRJNA650245	SRR12379497	PAIRED	Inverse rRNA	Severe acute respiratory syndrome coronavirus 2		BS05795A_R2.fastq	2734822	3890697	75	0.0192768
PRJNA650245	SRR12379499	PAIRED	Inverse rRNA	Severe acute respiratory syndrome coronavirus 2		BS05799A_R2.fastq	2569105	3720200	71	0.019085
PRJNA650245	SRR12379500	PAIRED	Inverse rRNA	Severe acute respiratory syndrome coronavirus 2		BS05797A_R2.fastq	3393752	5021084	68	0.0135429
PRJNA650245	SRR12379501	PAIRED	Inverse rRNA	Severe acute respiratory syndrome coronavirus 2		BS05802A_R2.fastq	1836788	2597301	69	0.026566
PRJNA650245	SRR12379502	PAIRED	Inverse rRNA	Severe acute respiratory syndrome coronavirus 2		BS05771A_R2.fastq	267730	368406	11	0.0298584
PRJNA650245	SRR12379503	PAIRED	Inverse rRNA	Severe acute respiratory syndrome coronavirus 2		BS05732A_R2.fastq	711134	960227	15	0.0156213
PRJNA650245	SRR12379504	PAIRED	Inverse rRNA	Severe acute respiratory syndrome coronavirus 2		BS05800A_R2.fastq	1034337	1467729	36	0.0245277
PRJNA650245	SRR12379505	PAIRED	Inverse rRNA	Severe acute respiratory syndrome coronavirus 2		BS05750A_R2.fastq	2322460	3166695	123	0.0388418
PRJNA650245	SRR12379507	PAIRED	Inverse rRNA	Severe acute respiratory syndrome coronavirus 2		BS05761A_R2.fastq	347331	500040	6	0.011999
PRJNA650245	SRR12379508	PAIRED	Inverse rRNA	Severe acute respiratory syndrome coronavirus 2		BS05739A_R2.fastq	1231507	1754644	57	0.0324852
PRJNA650245	SRR12379509	PAIRED	Inverse rRNA	Severe acute respiratory syndrome coronavirus 2		BS05756A_R2.fastq	729766	965998	48	0.0496895
PRJNA650245	SRR12379511	PAIRED	Inverse rRNA	Severe acute respiratory syndrome coronavirus 2		BS05798A_R2.fastq	666141	986312	20	0.0202776
PRJNA650245	SRR12379512	PAIRED	Inverse rRNA	Severe acute respiratory syndrome coronavirus 2		BS05790A_R2.fastq	2354738	3487260	63	0.0180658
PRJNA650245	SRR12379513	PAIRED	Inverse rRNA	Severe acute respiratory syndrome coronavirus 2		BS05787A_R2.fastq	2264850	3395816	37	0.0108958
PRJNA650245	SRR12379514	PAIRED	Inverse rRNA	Severe acute respiratory syndrome coronavirus 2		BS05788A_R2.fastq	1845613	2616637	56	0.0214015
PRJNA650245	SRR12379515	PAIRED	Inverse rRNA	Severe acute respiratory syndrome coronavirus 2		BS05764A_R2.fastq	2998005	4285559	72	0.0168006
PRJNA650245	SRR12379516	PAIRED	Inverse rRNA	Severe acute respiratory syndrome coronavirus 2		BS05743A_R2.fastq	788405	1146308	15	0.0130855
PRJNA650245	SRR12379518	PAIRED	Inverse rRNA	Severe acute respiratory syndrome coronavirus 2		BS05777A_R2.fastq	3588521	4959362	97	0.019559
PRJNA650245	SRR12379519	PAIRED	Inverse rRNA	Severe acute respiratory syndrome coronavirus 2		BS05728A_R2.fastq	1626624	2370339	35	0.0147658
PRJNA650245	SRR12379520	PAIRED	Inverse rRNA	Severe acute respiratory syndrome coronavirus 2		BS05778A_R2.fastq	2805482	3560402	119	0.0334232
PRJNA650245	SRR12379522	PAIRED	Inverse rRNA	Severe acute respiratory syndrome coronavirus 2		BS05815A_R1.fastq	1662256	2521862	27	0.0107064
PRJNA650245	SRR12379523	PAIRED	Inverse rRNA	Severe acute respiratory syndrome coronavirus 2		BS05814A_R1.fastq	2487502	3582178	78	0.0217745
PRJNA650245	SRR12379524	PAIRED	Inverse rRNA	Severe acute respiratory syndrome coronavirus 2		BS05813A_R1.fastq	1228100	1952669	26	0.0133151
PRJNA650245	SRR12379525	PAIRED	Inverse rRNA	Severe acute respiratory syndrome coronavirus 2		BS05811A_R2.fastq	3863114	5841307	96	0.0164347
PRJNA650245	SRR12379526	PAIRED	Inverse rRNA	Severe acute respiratory syndrome coronavirus 2		BS05810A_R2.fastq	3144106	4739892	97	0.0204646
PRJNA650245	SRR12379527	PAIRED	Inverse rRNA	Severe acute respiratory syndrome coronavirus 2		BS05809A_R2.fastq	3770188	5594350	109	0.0194839
PRJNA650245	SRR12379529	PAIRED	Inverse rRNA	Severe acute respiratory syndrome coronavirus 2		BS05808A_R2.fastq	3271412	4881234	79	0.0161844
PRJNA650245	SRR12379530	PAIRED	Inverse rRNA	Severe acute respiratory syndrome coronavirus 2		BS05807A_R2.fastq	2865712	4312540	52	0.0120579
PRJNA650245	SRR12379532	PAIRED	Inverse rRNA	Severe acute respiratory syndrome coronavirus 2		BS05806A_R2.fastq	1577197	2388521	34	0.0142348
PRJNA650245	SRR12379536	PAIRED	Inverse rRNA	Severe acute respiratory syndrome coronavirus 2			11205420	17627353	108	0.00612684
PRJNA650245	SRR12379542	PAIRED	Inverse rRNA	Severe acute respiratory syndrome coronavirus 2		BS05812A_R2.fastq	978267	1432191	40	0.0279292
PRJNA650245	SRR12379548	PAIRED	Inverse rRNA	Severe acute respiratory syndrome coronavirus 2		BS05805A_R2.fastq	3937692	6123495	94	0.0153507
PRJNA650245	SRR12379549	PAIRED	Inverse rRNA	Severe acute respiratory syndrome coronavirus 2		BS05804A_R2.fastq	253026	378011	5	0.0132271
PRJNA650245	SRR12379550	PAIRED	Inverse rRNA	Severe acute respiratory syndrome coronavirus 2		BS05642A_R2.fastq	673458	1022396	19	0.0185838
PRJNA650245	SRR12379551	PAIRED	Inverse rRNA	Severe acute respiratory syndrome coronavirus 2			9546713	15177944	256	0.0168666
PRJNA650245	SRR12379552	PAIRED	Inverse rRNA	Severe acute respiratory syndrome coronavirus 2		BS05666A_R2.fastq	2342186	3486567	68	0.0195034
PRJNA650245	SRR12379553	PAIRED	Inverse rRNA	Severe acute respiratory syndrome coronavirus 2		BS05668A_R2.fastq	1500719	2239730	35	0.0156269
PRJNA650245	SRR12379555	PAIRED	Inverse rRNA	Severe acute respiratory syndrome coronavirus 2		BS05664A_R2.fastq	626460	932044	67	0.071885
PRJNA650245	SRR12379556	PAIRED	Inverse rRNA	Severe acute respiratory syndrome coronavirus 2			12997509	20382381	261	0.0128052
PRJNA650245	SRR12379557	PAIRED	Inverse rRNA	Severe acute respiratory syndrome coronavirus 2		BS05651A_R2.fastq	1126711	1659437	35	0.0210915
PRJNA650245	SRR12379559	PAIRED	Inverse rRNA	Severe acute respiratory syndrome coronavirus 2		BS05649A_R2.fastq	4983352	7127177	182	0.0255361
PRJNA650245	SRR12379560	PAIRED	Inverse rRNA	Severe acute respiratory syndrome coronavirus 2		BS05654A_R2.fastq	497862	751218	16	0.0212987
PRJNA650245	SRR12379561	PAIRED	Inverse rRNA	Severe acute respiratory syndrome coronavirus 2		BS05652A_R2.fastq	3108592	4944971	62	0.012538
PRJNA650245	SRR12379562	PAIRED	Inverse rRNA	Severe acute respiratory syndrome coronavirus 2		BS05643A_R2.fastq	8152869	12900289	177	0.0137206
PRJNA650245	SRR12379563	PAIRED	Inverse rRNA	Severe acute respiratory syndrome coronavirus 2		BS05646A_R2.fastq	8260311	13981740	101	0.00722371
PRJNA650245	SRR12379564	PAIRED	Inverse rRNA	Severe acute respiratory syndrome coronavirus 2		BS05647A_R2.fastq	1480185	2107567	66	0.0313157
PRJNA650245	SRR12379566	PAIRED	Inverse rRNA	Severe acute respiratory syndrome coronavirus 2		BS05644A_R2.fastq	4588555	7119249	184	0.0258454
PRJNA650245	SRR12379567	PAIRED	Inverse rRNA	Severe acute respiratory syndrome coronavirus 2		BS05658A_R2.fastq	627270	939921	20	0.0212784
PRJNA650245	SRR12379568	PAIRED	Inverse rRNA	Severe acute respiratory syndrome coronavirus 2		BS05657A_R2.fastq	5976085	8701087	220	0.0252842
PRJNA650245	SRR12379569	PAIRED	Inverse rRNA	Severe acute respiratory syndrome coronavirus 2		BS05660A_R2.fastq	2840166	4270435	110	0.0257585
PRJNA650245	SRR12379571	PAIRED	Inverse rRNA	Severe acute respiratory syndrome coronavirus 2		BS05661A_R2.fastq	662347	926570	27	0.0291397
PRJNA650245	SRR12379572	PAIRED	Inverse rRNA	Severe acute respiratory syndrome coronavirus 2		BS05566A_R2.fastq	3465097	4888264	116	0.0237303
PRJNA650245	SRR12379573	PAIRED	Inverse rRNA	Severe acute respiratory syndrome coronavirus 2		BS05556A_R2.fastq	3593752	4876302	181	0.0371183
PRJNA650245	SRR12379574	PAIRED	Inverse rRNA	Severe acute respiratory syndrome coronavirus 2		BS05554A_R2.fastq	375959	498340	12	0.0240799
PRJNA650245	SRR12379575	PAIRED	Inverse rRNA	Severe acute respiratory syndrome coronavirus 2			16287779	25970891	252	0.00970317
PRJNA650245	SRR12379577	PAIRED	Inverse rRNA	Severe acute respiratory syndrome coronavirus 2		BS05640A_R2.fastq	1962507	3018733	46	0.0152382
PRJNA650245	SRR12379578	PAIRED	Inverse rRNA	Severe acute respiratory syndrome coronavirus 2		BS05584A_R2.fastq	1451604	2137126	53	0.0247997
PRJNA650245	SRR12379579	PAIRED	Inverse rRNA	Severe acute respiratory syndrome coronavirus 2		BS05563A_R2.fastq	3281770	5009623	80	0.0159693
PRJNA650245	SRR12379580	PAIRED	Inverse rRNA	Severe acute respiratory syndrome coronavirus 2		BS05553A_R2.fastq	7140841	10027245	222	0.0221397
PRJNA650245	SRR12379581	PAIRED	Inverse rRNA	Severe acute respiratory syndrome coronavirus 2		BS05587A_R2.fastq	525026	775504	16	0.0206317
PRJNA650245	SRR12379612	PAIRED	Inverse rRNA	Severe acute respiratory syndrome coronavirus 2			18808129	32777025	121	0.00369161
PRJNA650245	SRR12379616	PAIRED	Inverse rRNA	Severe acute respiratory syndrome coronavirus 2		BS05560A_R2.fastq	237501	331425	6	0.0181036
PRJNA650245	SRR12379617	PAIRED	Inverse rRNA	Severe acute respiratory syndrome coronavirus 2			10886475	16338977	208	0.0127303
PRJNA650245	SRR12379618	PAIRED	Inverse rRNA	Severe acute respiratory syndrome coronavirus 2		BS05564A_R2.fastq	6177676	9599831	111	0.0115627
PRJNA650245	SRR12379619	PAIRED	Inverse rRNA	Severe acute respiratory syndrome coronavirus 2		BS05559A_R1.fastq	7716944	12330275	150	0.0121652
PRJNA650245	SRR12379621	PAIRED	Inverse rRNA	Severe acute respiratory syndrome coronavirus 2		BS05613A_R2.fastq	1912056	2803409	41	0.0146251
PRJNA650245	SRR12379622	PAIRED	Inverse rRNA	Severe acute respiratory syndrome coronavirus 2		BS05614A_R2.fastq	885694	1288164	48	0.0372623
PRJNA650245	SRR12379623	PAIRED	Inverse rRNA	Severe acute respiratory syndrome coronavirus 2		BS05555A_R2.fastq	573906	801686	40	0.0498948
PRJNA650245	SRR12379625	PAIRED	Inverse rRNA	Severe acute respiratory syndrome coronavirus 2		BS05558A_R2.fastq	7101661	11032350	212	0.0192162
PRJNA650245	SRR12379626	PAIRED	Inverse rRNA	Severe acute respiratory syndrome coronavirus 2		BS05623A_R2.fastq	118911	174665	6	0.0343515
PRJNA650245	SRR12379627	PAIRED	Inverse rRNA	Severe acute respiratory syndrome coronavirus 2		BS05632A_R2.fastq	6621522	10211363	178	0.0174316
PRJNA650245	SRR12379628	PAIRED	Inverse rRNA	Severe acute respiratory syndrome coronavirus 2		BS05629A_R2.fastq	4744667	7091195	175	0.0246785
PRJNA650245	SRR12379629	PAIRED	Inverse rRNA	Severe acute respiratory syndrome coronavirus 2		BS05634A_R2.fastq	1713563	2489962	48	0.0192774
PRJNA650245	SRR12379630	PAIRED	Inverse rRNA	Severe acute respiratory syndrome coronavirus 2		BS05624A_R2.fastq	2029511	3135965	56	0.0178573
PRJNA650245	SRR12379632	PAIRED	Inverse rRNA	Severe acute respiratory syndrome coronavirus 2		BS05645A_R2.fastq	3435601	4838828	118	0.0243861
PRJNA650245	SRR12379633	PAIRED	Inverse rRNA	Severe acute respiratory syndrome coronavirus 2		BS05630A_R2.fastq	1471182	2187449	64	0.0292578
PRJNA650245	SRR12379634	PAIRED	Inverse rRNA	Severe acute respiratory syndrome coronavirus 2		BS05626A_R2.fastq	4453678	6746039	97	0.0143788
PRJNA650245	SRR12379635	PAIRED	Inverse rRNA	Severe acute respiratory syndrome coronavirus 2		BS05636A_R2.fastq	953776	1418279	27	0.0190372
PRJNA650245	SRR12379637	PAIRED	Inverse rRNA	Severe acute respiratory syndrome coronavirus 2		BS05635A_R2.fastq	1169355	1684832	28	0.0166189
PRJNA650245	SRR12379638	PAIRED	Inverse rRNA	Severe acute respiratory syndrome coronavirus 2		BS05628A_R2.fastq	3170955	4949786	68	0.013738
PRJNA650245	SRR12379639	PAIRED	Inverse rRNA	Severe acute respiratory syndrome coronavirus 2		BS05627A_R2.fastq	544434	787947	23	0.0291898
PRJNA650245	SRR12379640	PAIRED	Inverse rRNA	Severe acute respiratory syndrome coronavirus 2		BS05639A_R2.fastq	604566	908990	24	0.0264029
PRJNA650245	SRR12379641	PAIRED	Inverse rRNA	Severe acute respiratory syndrome coronavirus 2		BS05633A_R2.fastq	185623	290882	5	0.0171891
PRJNA650245	SRR12379642	PAIRED	Inverse rRNA	Severe acute respiratory syndrome coronavirus 2			15803188	24621694	242	0.00982873
PRJNA650245	SRR12379644	PAIRED	Inverse rRNA	Severe acute respiratory syndrome coronavirus 2		BS05617A_R2.fastq	2490189	3838685	51	0.0132858
PRJNA650245	SRR12379645	PAIRED	Inverse rRNA	Severe acute respiratory syndrome coronavirus 2			9863970	14931198	288	0.0192885
PRJNA650245	SRR12379646	PAIRED	Inverse rRNA	Severe acute respiratory syndrome coronavirus 2			10254758	15225715	326	0.0214111
PRJNA650245	SRR12379647	PAIRED	Inverse rRNA	Severe acute respiratory syndrome coronavirus 2		BS05615A_R2.fastq	4912902	7175109	200	0.0278741
PRJNA650245	SRR12379649	PAIRED	Inverse rRNA	Severe acute respiratory syndrome coronavirus 2			17803769	30278503	196	0.00647324
PRJNA650245	SRR12379650	PAIRED	Inverse rRNA	Severe acute respiratory syndrome coronavirus 2		BS05616A_R2.fastq	1370865	1962436	51	0.0259881
PRJNA650245	SRR12379651	PAIRED	Inverse rRNA	Severe acute respiratory syndrome coronavirus 2		BS06684A_R1.fastq	246005	384576	28	0.0728075
PRJNA650245	SRR12379652	PAIRED	Inverse rRNA	Severe acute respiratory syndrome coronavirus 2		BS05576A_R2.fastq	8209285	12361334	221	0.0178783
PRJNA650245	SRR12379653	PAIRED	Inverse rRNA	Severe acute respiratory syndrome coronavirus 2		BS06670A_R1.fastq	669860	1038580	98	0.0943596
PRJNA650245	SRR12379656	PAIRED	Inverse rRNA	Severe acute respiratory syndrome coronavirus 2		BS06658A_R1.fastq	2674343	4179471	366	0.0875709
PRJNA650245	SRR12379657	PAIRED	Inverse rRNA	Severe acute respiratory syndrome coronavirus 2		BS06659A_R1.fastq	2198651	3227301	414	0.128281
PRJNA650245	SRR12379658	PAIRED	Inverse rRNA	Severe acute respiratory syndrome coronavirus 2		BS06660A_R1.fastq	112946	173473	13	0.0749396
PRJNA650245	SRR12379659	PAIRED	Inverse rRNA	Severe acute respiratory syndrome coronavirus 2		BS06654A_R1.fastq	53931	83231	6	0.0720885
PRJNA650245	SRR12379664	PAIRED	Inverse rRNA	Severe acute respiratory syndrome coronavirus 2		BS06672A_R1.fastq	303619	449455	59	0.13127
PRJNA650245	SRR12379666	PAIRED	Inverse rRNA	Severe acute respiratory syndrome coronavirus 2		BS05141A_R2.fastq	464863	754644	0	0
PRJNA650245	SRR12379667	PAIRED	Inverse rRNA	Severe acute respiratory syndrome coronavirus 2		BS06682A_R1.fastq	62835	98389	11	0.111801
PRJNA650245	SRR12379675	PAIRED	Inverse rRNA	Severe acute respiratory syndrome coronavirus 2		BS06681A_R1.fastq	3260320	5004808	496	0.0991047
PRJNA650245	SRR12379678	PAIRED	Inverse rRNA	Severe acute respiratory syndrome coronavirus 2		BS06653A_R1.fastq	826371	1297270	71	0.0547303
PRJNA650245	SRR12379681	PAIRED	Inverse rRNA	Severe acute respiratory syndrome coronavirus 2		BS05973A_R1.fastq	3048644	5322558	19	0.00356971
PRJNA650245	SRR12379682	PAIRED	Inverse rRNA	Severe acute respiratory syndrome coronavirus 2		BS05964A_R1.fastq	2537108	4452295	20	0.00449207
PRJNA650245	SRR12379683	PAIRED	Inverse rRNA	Severe acute respiratory syndrome coronavirus 2		BS05931A_R1.fastq	32010	55595	0	0
PRJNA650245	SRR12379684	PAIRED	Inverse rRNA	Severe acute respiratory syndrome coronavirus 2		BS05063A_R2.fastq	1475224	2631067	8	0.00304059
PRJNA650245	SRR12379685	PAIRED	Inverse rRNA	Severe acute respiratory syndrome coronavirus 2		BS05922A_R1.fastq	3910940	5999214	106	0.017669
PRJNA650245	SRR12379687	PAIRED	Inverse rRNA	Severe acute respiratory syndrome coronavirus 2		BS05062A_R2.fastq	1592815	2824344	11	0.00389471
PRJNA650245	SRR12379688	PAIRED	Inverse rRNA	Severe acute respiratory syndrome coronavirus 2		BS05621A_R2.fastq	1628667	2422133	42	0.0173401
PRJNA650245	SRR12379689	PAIRED	Inverse rRNA	Severe acute respiratory syndrome coronavirus 2			11070892	17562211	194	0.0110464
PRJNA650245	SRR12379691	PAIRED	Inverse rRNA	Severe acute respiratory syndrome coronavirus 2		BS05622A_R2.fastq	2397873	3484024	66	0.0189436
PRJNA650245	SRR12379692	PAIRED	Inverse rRNA	Severe acute respiratory syndrome coronavirus 2			15703078	23064021	378	0.0163892
PRJNA650245	SRR12379693	PAIRED	Inverse rRNA	Severe acute respiratory syndrome coronavirus 2		BS05618A_R2.fastq	6794768	10393753	146	0.0140469
PRJNA650245	SRR12379694	PAIRED	Inverse rRNA	Severe acute respiratory syndrome coronavirus 2		BS05582A_R2.fastq	6563456	9886066	308	0.031155
PRJNA650245	SRR12379696	PAIRED	Inverse rRNA	Severe acute respiratory syndrome coronavirus 2		BS05572A_R2.fastq	1351351	2012203	31	0.015406
PRJNA650245	SRR12379697	PAIRED	Inverse rRNA	Severe acute respiratory syndrome coronavirus 2			12921787	20744598	214	0.0103159
PRJNA650245	SRR12379698	PAIRED	Inverse rRNA	Severe acute respiratory syndrome coronavirus 2		BS05574A_R2.fastq	7566025	11291812	153	0.0135496
PRJNA650245	SRR12379699	PAIRED	Inverse rRNA	Severe acute respiratory syndrome coronavirus 2		BS05569A_R2.fastq	3155616	4673946	101	0.0216091
PRJNA650245	SRR12379700	PAIRED	Inverse rRNA	Severe acute respiratory syndrome coronavirus 2		BS05571A_R2.fastq	3175499	4618281	64	0.013858
PRJNA650245	SRR12379702	PAIRED	Inverse rRNA	Severe acute respiratory syndrome coronavirus 2		BS05575A_R2.fastq	2297294	3795843	52	0.0136992
PRJNA650245	SRR12379703	PAIRED	Inverse rRNA	Severe acute respiratory syndrome coronavirus 2		BS05580A_R2.fastq	5352240	7737854	195	0.0252008
PRJNA650245	SRR12379704	PAIRED	Inverse rRNA	Severe acute respiratory syndrome coronavirus 2		BS05620A_R2.fastq	3298344	5127205	92	0.0179435
PRJNA650245	SRR12379705	PAIRED	Inverse rRNA	Severe acute respiratory syndrome coronavirus 2		BS05656A_R2.fastq	277597	394038	16	0.0406052
PRJNA650245	SRR12379706	PAIRED	Inverse rRNA	Severe acute respiratory syndrome coronavirus 2		BS05648A_R2.fastq	2253213	3358833	72	0.021436
PRJNA650245	SRR12379707	PAIRED	Inverse rRNA	Severe acute respiratory syndrome coronavirus 2		BS05631A_R2.fastq	1226249	1943508	31	0.0159505
PRJNA650245	SRR12379708	PAIRED	Inverse rRNA	Severe acute respiratory syndrome coronavirus 2		BS05557A_R2.fastq	881046	1266184	33	0.0260626
PRJNA650245	SRR12379709	PAIRED	Inverse rRNA	Severe acute respiratory syndrome coronavirus 2		BS05665A_R2.fastq	2496404	3708258	55	0.0148318
PRJNA650245	SRR12379710	PAIRED	Inverse rRNA	Severe acute respiratory syndrome coronavirus 2		BS05612A_R2.fastq	2696931	4099904	75	0.0182931
PRJNA650245	SRR12379726	PAIRED	Inverse rRNA	Severe acute respiratory syndrome coronavirus 2		BS05061A_R1.fastq	8092261	14230427	51	0.00358387
PRJNA650245	SRR12379727	PAIRED	Inverse rRNA	Severe acute respiratory syndrome coronavirus 2		BS05060A_R1.fastq	8485743	14692101	84	0.00571736
PRJNA650245	SRR12379752	PAIRED	Inverse rRNA	Severe acute respiratory syndrome coronavirus 2		BS05057A_R1.fastq	16286460	28945508	73	0.00252198
PRJNA650245	SRR12379792	PAIRED	Inverse rRNA	Severe acute respiratory syndrome coronavirus 2		BS05059A_R1.fastq	6095395	10789901	47	0.00435593
PRJNA650245	SRR12379797	PAIRED	Inverse rRNA	Severe acute respiratory syndrome coronavirus 2		BS05056A_R1.fastq	877239	1349564	7	0.00518686
PRJNA650245	SRR12379809	PAIRED	Inverse rRNA	Severe acute respiratory syndrome coronavirus 2		BS05055A_R1.fastq	233021	417410	0	0
PRJNA650245	SRR12379822	PAIRED	Inverse rRNA	Severe acute respiratory syndrome coronavirus 2		BS05054A_R1.fastq	50313	89448	0	0
PRJNA650245	SRR12379850	PAIRED	Inverse rRNA	Severe acute respiratory syndrome coronavirus 2		BS05058A_R1.fastq	15742800	27254592	113	0.00414609
PRJNA650245	SRR12379866	PAIRED	Inverse rRNA	Severe acute respiratory syndrome coronavirus 2		BS05053A_R1.fastq	1619067	2759103	24	0.00869848
PRJNA650245	SRR12379878	PAIRED	Inverse rRNA	Severe acute respiratory syndrome coronavirus 2		BS05052A_R1.fastq	470461	808525	6	0.00742092
PRJNA650245	SRR12379891	PAIRED	Inverse rRNA	Severe acute respiratory syndrome coronavirus 2		BS05051A_R1.fastq	7621628	13149668	66	0.00501914
PRJNA650245	SRR12379921	PAIRED	Inverse rRNA	Severe acute respiratory syndrome coronavirus 2			12160184	20533842	167	0.00813292
PRJNA650245	SRR12379968	PAIRED	Inverse rRNA	Severe acute respiratory syndrome coronavirus 2			17138358	29037302	282	0.00971165
PRJNA650245	SRR12379970	PAIRED	Inverse rRNA	Severe acute respiratory syndrome coronavirus 2			1196870	1914536	23	0.0120134
PRJNA650245	SRR12380100	PAIRED	Inverse rRNA	Severe acute respiratory syndrome coronavirus 2		BS05144A_R1.fastq	1608784	2424729	9	0.00371176
PRJNA650245	SRR12380254	PAIRED	Inverse rRNA	Severe acute respiratory syndrome coronavirus 2		BS04998A_R1.fastq	13760341	26787549	13	0.0004853
PRJNA650245	SRR12380265	PAIRED	Inverse rRNA	Severe acute respiratory syndrome coronavirus 2		BS05001A_R1.fastq	13169391	25639502	0	0
PRJNA650245	SRR12380277	PAIRED	Inverse rRNA	Severe acute respiratory syndrome coronavirus 2		BS04996A_R1.fastq	13984348	27339010	19	0.000694978
PRJNA650245	SRR12380289	PAIRED	Inverse rRNA	Severe acute respiratory syndrome coronavirus 2		BS04999A_R1.fastq	13695273	26681067	0	0
PRJNA650245	SRR12380301	PAIRED	Inverse rRNA	Severe acute respiratory syndrome coronavirus 2		BS04995A_R1.fastq	5821368	11348398	25	0.00220295
PRJNA650245	SRR12380302	PAIRED	Inverse rRNA	Severe acute respiratory syndrome coronavirus 2		BS04863A_R1.fastq	567046	1107753	1	0.000902728
PRJNA650245	SRR12380304	PAIRED	Inverse rRNA	Severe acute respiratory syndrome coronavirus 2		BS04868A_R1.fastq	4535183	8874778	1	0.000112679
PRJNA650245	SRR12380314	PAIRED	Inverse rRNA	Severe acute respiratory syndrome coronavirus 2		BS04994A_R1.fastq	1143525	2228024	0	0
PRJNA650245	SRR12380327	PAIRED	Inverse rRNA	Severe acute respiratory syndrome coronavirus 2		BS04997A_R1.fastq	7162033	13979750	18	0.00128758
PRJNA650245	SRR12380340	PAIRED	Inverse rRNA	Severe acute respiratory syndrome coronavirus 2		BS05000A_R1.fastq	127459	246183	0	0
PRJNA661274	SRR12581863	PAIRED	cDNA	Homo sapiens	GBM and adjacent brain tissue		34245934	0	0	#DIV/0!
PRJNA661274	SRR12581864	PAIRED	cDNA	Homo sapiens	GBM and adjacent brain tissue		23746543	0	0	#DIV/0!
PRJNA661274	SRR12581865	PAIRED	cDNA	Homo sapiens	GBM and adjacent brain tissue		24804659	0	0	#DIV/0!
PRJNA661274	SRR12581866	PAIRED	cDNA	Homo sapiens	GBM and adjacent brain tissue		15042871	0	0	#DIV/0!
PRJNA665581	SRR12709016	PAIRED	other	Homo sapiens	lung		27047805	28926	0	0
PRJNA665581	SRR12709017	PAIRED	other	Homo sapiens	lung		26917450	20675	2	0.0967352
PRJNA666421	SRR12742794	PAIRED	cDNA	Homo sapiens	lung		50865414	0	0	#DIV/0!
PRJNA666421	SRR12742799	PAIRED	cDNA	Homo sapiens	lung		53759513	0	0	#DIV/0!
PRJNA666421	SRR12742801	PAIRED	cDNA	Homo sapiens	lung		51962763	0	0	#DIV/0!
PRJNA667921	SRR12789543	PAIRED	cDNA	Homo sapiens		A549_24hr_WT_fq1.fq	7761483	38	0	0
PRJNA667921	SRR12789544	PAIRED	cDNA	Homo sapiens		A549_12hr_COVID_fq1.fq	7833361	5814431	3	0.000515958
PRJNA667921	SRR12789545	PAIRED	cDNA	Homo sapiens		A549_18hr_COVID_fq1.fq	6224582	5706535	3	0.000525713
PRJNA667921	SRR12789546	PAIRED	cDNA	Homo sapiens		A549_24hr_COVID_fq1.fq	7387160	7510697	6	0.000798861
PRJNA667921	SRR12789547	PAIRED	cDNA	Homo sapiens		293_24hr_control_1_fq1.fq	7632134	2	0	0
PRJNA667921	SRR12789548	PAIRED	cDNA	Homo sapiens		293_24hr_control_2_fq1.fq	8003484	4	0	0
PRJNA667921	SRR12789549	PAIRED	cDNA	Homo sapiens		293_24hr_control_3_fq1.fq	7616487	1288	0	0
PRJNA667921	SRR12789550	PAIRED	cDNA	Homo sapiens		293_12hr_COVID_1_fq1.fq	7100590	7170145	6	0.000836803
PRJNA667921	SRR12789551	PAIRED	cDNA	Homo sapiens		293_12hr_COVID_2_fq1.fq	7685596	7883946	9	0.00114156
PRJNA667921	SRR12789552	PAIRED	cDNA	Homo sapiens		293_12hr_COVID_3_fq1.fq	7275620	7715535	15	0.00194413
PRJNA667921	SRR12789553	PAIRED	cDNA	Homo sapiens		293_18hr_COVID_1_fq1.fq	7519692	9503449	15	0.00157837
PRJNA667921	SRR12789554	PAIRED	cDNA	Homo sapiens		293_18hr_COVID_2_fq1.fq	7535843	9405410	17	0.00180747
PRJNA667921	SRR12789555	PAIRED	cDNA	Homo sapiens		293_18hr_COVID_3_fq1.fq	8254414	10346119	19	0.00183644
PRJNA667921	SRR12789556	PAIRED	cDNA	Homo sapiens		293_24hr_COVID_1_fq1.fq	8047644	10415385	29	0.00278434
PRJNA667921	SRR12789557	PAIRED	cDNA	Homo sapiens		293_24hr_COVID_2_fq1.fq	8093675	10514364	32	0.00304346
PRJNA667921	SRR12789558	PAIRED	cDNA	Homo sapiens		293_24hr_COVID_3_fq1.fq	7356772	9189506	26	0.00282931
PRJNA615032	SRR11517691	SINGLE		Mustela putorious furo				0	0
PRJNA615032	SRR11517692	SINGLE		Mustela putorious furo				1	0
PRJNA615032	SRR11517693	SINGLE		Mustela putorious furo				1	0
PRJNA615032	SRR11517694	SINGLE		Mustela putorious furo				1	0
PRJNA615032	SRR11517695	SINGLE		Mustela putorious furo				0	0
PRJNA615032	SRR11517696	SINGLE		Mustela putorious furo				0	0
PRJNA615032	SRR11517697	SINGLE		Mustela putorious furo				0	0
PRJNA615032	SRR11517698	SINGLE		Mustela putorious furo				0	0
PRJNA615032	SRR11517703	SINGLE		Mustela putorious furo				0	0
PRJNA615032	SRR11517704	SINGLE		Mustela putorious furo				0	0
PRJNA615032	SRR11517705	SINGLE		Mustela putorious furo				0	0
PRJNA615032	SRR11517706	SINGLE		Mustela putorious furo				0	0
PRJNA615032	SRR11517707	SINGLE		Mustela putorious furo				1	0
PRJNA615032	SRR11517708	SINGLE		Mustela putorious furo				0	0
PRJNA615032	SRR11517709	SINGLE		Mustela putorious furo				0	0
PRJNA615032	SRR11517710	SINGLE		Mustela putorious furo				0	0
PRJNA615032	SRR11517711	SINGLE		Mustela putorious furo				0	0
PRJNA615032	SRR11517712	SINGLE		Mustela putorious furo				0	0
PRJNA615032	SRR11517713	SINGLE		Mustela putorious furo				0	0
PRJNA615032	SRR11517714	SINGLE		Mustela putorious furo				0	0
PRJNA615032	SRR11517715	SINGLE		Mustela putorious furo				0	0
PRJNA615032	SRR11517716	SINGLE		Mustela putorious furo				0	0
PRJNA615032	SRR11517717	SINGLE		Mustela putorious furo				0	0
PRJNA615032	SRR11517718	SINGLE		Mustela putorious furo				0	0
PRJNA615032	SRR11517839	SINGLE		Mustela putorious furo				263	0
PRJNA615032	SRR11517840	SINGLE		Mustela putorious furo				246	0
PRJNA615032	SRR11517841	SINGLE		Mustela putorious furo				230	0
PRJNA615032	SRR11517842	SINGLE		Mustela putorious furo				232	0
PRJNA615032	SRR11517843	SINGLE		Mustela putorious furo				27	0
PRJNA615032	SRR11517844	SINGLE		Mustela putorious furo				38	0
PRJNA615032	SRR11517845	SINGLE		Mustela putorious furo				23	0
PRJNA615032	SRR11517846	SINGLE		Mustela putorious furo				25	0
PRJNA615032	SRR11517855	SINGLE		Mustela putorious furo				22910	0
PRJNA615032	SRR11517856	SINGLE		Mustela putorious furo				23101	0
PRJNA615032	SRR11517857	SINGLE		Mustela putorious furo				21550	0
PRJNA615032	SRR11517858	SINGLE		Mustela putorious furo				21275	0
PRJNA615032	SRR11517859	SINGLE		Mustela putorious furo				295	0
PRJNA615032	SRR11517860	SINGLE		Mustela putorious furo				274	0
PRJNA615032	SRR11517861	SINGLE		Mustela putorious furo				265	0
PRJNA615032	SRR11517862	SINGLE		Mustela putorious furo				252	0
PRJNA615032	SRR11517871	SINGLE		Mustela putorious furo				0	0
PRJNA615032	SRR11517872	SINGLE		Mustela putorious furo				0	0
PRJNA615032	SRR11517873	SINGLE		Mustela putorious furo				0	0
PRJNA615032	SRR11517874	SINGLE		Mustela putorious furo				0	0
PRJNA615032	SRR11517875	SINGLE		Mustela putorious furo				1536	0
PRJNA615032	SRR11517876	SINGLE		Mustela putorious furo				1492	0
PRJNA615032	SRR11517877	SINGLE		Mustela putorious furo				1418	0
PRJNA615032	SRR11517878	SINGLE		Mustela putorious furo				1498	0
PRJNA627454	SRR11589514	PAIRED	cDNA	Mus musculus			183742017	in down		#VALUE!
PRJNA627454	SRR11589515	PAIRED	cDNA	Mus musculus			204318629	in down		#VALUE!
PRJNA627454	SRR11589516	PAIRED	cDNA	Mus musculus			190842379	in down		#VALUE!
PRJNA627454	SRR11589517	PAIRED	cDNA	Mus musculus			148770507	in down		#VALUE!
PRJNA627454	SRR11589518	PAIRED	cDNA	Mus musculus			200197333	in down		#VALUE!
PRJNA627454	SRR11589519	PAIRED	cDNA	Mus musculus			191441770	in down		#VALUE!
PRJNA627454	SRR11589520	PAIRED	cDNA	Mus musculus			156229641	in down		#VALUE!
PRJNA627454	SRR11589521	PAIRED	cDNA	Mus musculus			173927483	in down		#VALUE!
PRJNA627454	SRR11589522	PAIRED	cDNA	Mus musculus			6552299	1340	0	0
PRJNA627454	SRR11589523	PAIRED	cDNA	Mus musculus			5708945	1395	0	0
PRJNA627454	SRR11589524	PAIRED	cDNA	Mus musculus			6859345	1327	0	0
PRJNA627454	SRR11589525	PAIRED	cDNA	Mus musculus			7011136	1400	0	0
PRJNA627454	SRR11589526	PAIRED	cDNA	Mus musculus			6134501	1256	0	0
PRJNA627454	SRR11589527	PAIRED	cDNA	Mus musculus			8597210	1531	0	0
PRJNA627454	SRR11589528	PAIRED	cDNA	Mus musculus			7570974	1074	0	0
PRJNA627454	SRR11589529	PAIRED	cDNA	Mus musculus			8175756	1574	0	0
PRJNA627454	SRR11589530	PAIRED	cDNA	Mus musculus			8190039	1515	0	0
PRJNA627454	SRR11589531	PAIRED	cDNA	Mus musculus			7454609	1122	0	0
PRJNA627454	SRR11589532	PAIRED	cDNA	Mus musculus			6640214	1224	0	0
PRJNA627454	SRR11589533	PAIRED	cDNA	Mus musculus			5996379	2004	0	0
PRJNA627454	SRR11589534	PAIRED	cDNA	Mus musculus			3373720	172	0	0
PRJNA627454	SRR11589535	PAIRED	cDNA	Mus musculus			3685898	157	0	0
PRJNA627454	SRR11589536	PAIRED	cDNA	Mus musculus			6745857	293	0	0
PRJNA627454	SRR11589537	PAIRED	cDNA	Mus musculus			3557760	179	0	0
PRJNA627454	SRR11589538	PAIRED	cDNA	Mus musculus			3377361	198	0	0
PRJNA627454	SRR11589539	PAIRED	cDNA	Mus musculus			4940970	208	0	0
PRJNA627454	SRR11589540	PAIRED	cDNA	Mus musculus			6075499	215	0	0
PRJNA627454	SRR11589541	PAIRED	cDNA	Mus musculus			4623065	171	0	0
PRJNA627454	SRR11589542	PAIRED	cDNA	Mus musculus			4113170	188	0	0
PRJNA627454	SRR11589543	PAIRED	cDNA	Mus musculus			4831612	189	0	0
PRJNA627454	SRR11589544	PAIRED	cDNA	Mus musculus			3728626	142	0	0
PRJNA627454	SRR11589545	PAIRED	cDNA	Mus musculus			3329474	159	0	0
PRJNA627454	SRR11589546	PAIRED	cDNA	Mus musculus			3867435	1221	0	0
PRJNA627454	SRR11589547	PAIRED	cDNA	Mus musculus			4477371	1236	0	0
PRJNA627454	SRR11589548	PAIRED	cDNA	Mus musculus			5469254	1306	0	0
PRJNA627454	SRR11589549	PAIRED	cDNA	Mus musculus			4264951	1170	0	0
PRJNA627454	SRR11589550	PAIRED	cDNA	Mus musculus			4181674	1458	0	0
PRJNA627454	SRR11589551	PAIRED	cDNA	Mus musculus			6667031	1549	0	0
PRJNA627454	SRR11589552	PAIRED	cDNA	Mus musculus			7164282	1145	0	0
PRJNA627454	SRR11589553	PAIRED	cDNA	Mus musculus			8533943			#DIV/0!
PRJNA627454	SRR11589554	PAIRED	cDNA	Mus musculus			6830797	1454	0	0
PRJNA627454	SRR11589555	PAIRED	cDNA	Mus musculus			6395825	1227	0	0
PRJNA627454	SRR11589556	PAIRED	cDNA	Mus musculus			4550741	1164	0	0
PRJNA627454	SRR11589557	PAIRED	cDNA	Mus musculus			4362501	1150	0	0
PRJNA627454	SRR11589558	PAIRED	cDNA	Mus musculus			3573302	1376	0	0
PRJNA627454	SRR11589559	PAIRED	cDNA	Mus musculus			3538287	1406	0	0
PRJNA627454	SRR11589560	PAIRED	cDNA	Mus musculus			2090244	844	0	0
PRJNA627454	SRR11589561	PAIRED	cDNA	Mus musculus			3904224	1467	0	0
PRJNA627454	SRR11589562	PAIRED	cDNA	Mus musculus			4615412	1561	0	0
PRJNA627454	SRR11589563	PAIRED	cDNA	Mus musculus			5225996	1574	0	0
PRJNA627454	SRR11589564	PAIRED	cDNA	Mus musculus			1701876	708	0	0
PRJNA627454	SRR11589565	PAIRED	cDNA	Mus musculus			1522966	606	0	0
PRJNA627454	SRR11589566	PAIRED	cDNA	Mus musculus			758658	261	0	0
PRJNA627454	SRR11589567	PAIRED	cDNA	Mus musculus			3998464	909	0	0
PRJNA627454	SRR11589568	PAIRED	cDNA	Mus musculus			1629713	542	0	0
PRJNA627454	SRR11589569	PAIRED	cDNA	Mus musculus			2037159	660	0	0
PRJNA627454	SRR11589570	PAIRED	cDNA	Mus musculus			4406406	1573	0	0
PRJNA627454	SRR11589571	PAIRED	cDNA	Mus musculus			3121547	1333	0	0
PRJNA627454	SRR11589572	PAIRED	cDNA	Mus musculus			4509742	1793	0	0
PRJNA627454	SRR11589573	PAIRED	cDNA	Mus musculus			4493542	1732	0	0
PRJNA627454	SRR11589574	PAIRED	cDNA	Mus musculus			5327900	1795	0	0
PRJNA627454	SRR11589575	PAIRED	cDNA	Mus musculus			6613516	1705	0	0
PRJNA627454	SRR11589576	PAIRED	cDNA	Mus musculus			5738124	1332	0	0
PRJNA627454	SRR11589577	PAIRED	cDNA	Mus musculus			4364154			#DIV/0!
PRJNA627454	SRR11589578	PAIRED	cDNA	Mus musculus			4550696	1409	0	0
PRJNA627454	SRR11589579	PAIRED	cDNA	Mus musculus			3983125	836	0	0
PRJNA627454	SRR11589580	PAIRED	cDNA	Mus musculus			4390736	1130	0	0
PRJNA627454	SRR11589581	PAIRED	cDNA	Mus musculus			2815056	1028	0	0
PRJNA627454	SRR11589582	PAIRED	cDNA	Mus musculus			2447033	711	0	0
PRJNA627454	SRR11589583	PAIRED	cDNA	Mus musculus			1954805	716	0	0
PRJNA627454	SRR11589584	PAIRED	cDNA	Mus musculus			2788286	762	0	0
PRJNA627454	SRR11589585	PAIRED	cDNA	Mus musculus			2755528	725	0	0
PRJNA627454	SRR11589586	PAIRED	cDNA	Mus musculus			1918339	771	0	0
PRJNA627454	SRR11589587	PAIRED	cDNA	Mus musculus			1744152	673	0	0
PRJNA644357	SRR12153155	PAIRED	cDNA	Chlorocebus aethiops aethiops		sars2_30kb_longlib1_1_sequence.fastq	1233731	3366	0	0
PRJNA644357	SRR12153156	PAIRED	cDNA	Chlorocebus aethiops aethiops		sars2_30kb_longlib2_1_sequence.fastq	925783	46149	0	0
PRJNA644357	SRR12153157	PAIRED	cDNA	Chlorocebus aethiops aethiops		sars2_30kb_PCRframeshift1_2_sequence.fastq	329313	633956	0	0
PRJNA644357	SRR12153158	PAIRED	cDNA	Chlorocebus aethiops aethiops		SARS2_30kb_2_small_2_sequence.fastq	955127	2	0	0
PRJNA644357	SRR12153159	PAIRED	cDNA	Chlorocebus aethiops aethiops		sars2_30kb_longlib3_1_sequence.fastq	816931	11283	0	0
PRJNA644357	SRR12153160	PAIRED	cDNA	Chlorocebus aethiops aethiops		sars2_30kb_longlib4_1_sequence.fastq	561249	125586	0	0
PRJNA644357	SRR12153161	PAIRED	cDNA	Chlorocebus aethiops aethiops		sars2_30kb_PCRframeshift2_1_sequence.fastq	372319	710560	0	0
PRJNA644357	SRR12153162	PAIRED	cDNA	Chlorocebus aethiops aethiops		SARS2vivoUT_1_sequence.fastq	945980	590297	0	0
PRJNA649525	SRR12344131	PAIRED	cDNA	Macaca mulatta			37658138
PRJNA649525	SRR12344132	PAIRED	cDNA	Macaca mulatta			40308443
PRJNA649525	SRR12344133	PAIRED	cDNA	Macaca mulatta			36369274
PRJNA649525	SRR12344134	PAIRED	cDNA	Macaca mulatta			48313844
PRJNA649525	SRR12344135	PAIRED	cDNA	Macaca mulatta			46368212
PRJNA649525	SRR12344136	PAIRED	cDNA	Macaca mulatta			43910744
PRJNA649525	SRR12344137	PAIRED	cDNA	Macaca mulatta			48578293
PRJNA649525	SRR12344138	PAIRED	cDNA	Macaca mulatta			42661809
PRJNA649525	SRR12344139	PAIRED	cDNA	Macaca mulatta			37176867
PRJNA649525	SRR12344140	PAIRED	cDNA	Macaca mulatta			58568289
PRJNA649525	SRR12344141	PAIRED	cDNA	Macaca mulatta			51975564
PRJNA649525	SRR12344142	PAIRED	cDNA	Macaca mulatta			44374966
PRJNA649525	SRR12344143	PAIRED	cDNA	Macaca mulatta			59192309
PRJNA649525	SRR12344144	PAIRED	cDNA	Macaca mulatta			52907734
PRJNA649525	SRR12344145	PAIRED	cDNA	Macaca mulatta			30754548
PRJNA649525	SRR12344146	PAIRED	cDNA	Macaca mulatta			55048374
PRJNA649525	SRR12344147	PAIRED	cDNA	Macaca mulatta			46897697
PRJNA649525	SRR12344148	PAIRED	cDNA	Macaca mulatta			44183834
PRJNA649525	SRR12344149	PAIRED	cDNA	Macaca mulatta			46652084
PRJNA649525	SRR12344150	PAIRED	cDNA	Macaca mulatta			51954513
PRJNA649525	SRR12344151	PAIRED	cDNA	Macaca mulatta			29930595
PRJNA649525	SRR12344152	PAIRED	cDNA	Macaca mulatta			42739953
PRJNA649525	SRR12344153	PAIRED	cDNA	Macaca mulatta			43773573
PRJNA649525	SRR12344154	PAIRED	cDNA	Macaca mulatta			39455654
PRJNA649525	SRR12344155	PAIRED	cDNA	Macaca mulatta			38940806
PRJNA649525	SRR12344156	PAIRED	cDNA	Macaca mulatta			38989355
PRJNA649525	SRR12344157	PAIRED	cDNA	Macaca mulatta			37505121
PRJNA649525	SRR12344158	PAIRED	cDNA	Macaca mulatta			43755022
PRJNA649525	SRR12344159	PAIRED	cDNA	Macaca mulatta			43938720
PRJNA649525	SRR12344160	PAIRED	cDNA	Macaca mulatta			21474796
PRJNA649525	SRR12344161	PAIRED	cDNA	Macaca mulatta			43246765
PRJNA649525	SRR12344162	PAIRED	cDNA	Macaca mulatta			49509129
PRJNA649525	SRR12344163	PAIRED	cDNA	Macaca mulatta			44578777
PRJNA649525	SRR12344164	PAIRED	cDNA	Macaca mulatta			40272442
PRJNA649525	SRR12344165	PAIRED	cDNA	Macaca mulatta			46041297
PRJNA649525	SRR12344166	PAIRED	cDNA	Macaca mulatta			30204011
PRJNA649525	SRR12344167	PAIRED	cDNA	Macaca mulatta			33245634
PRJNA649525	SRR12344168	PAIRED	cDNA	Macaca mulatta			32744003
PRJNA649525	SRR12344169	PAIRED	cDNA	Macaca mulatta			40625030
PRJNA649525	SRR12344170	PAIRED	cDNA	Macaca mulatta			38530097
PRJNA649525	SRR12344171	PAIRED	cDNA	Macaca mulatta			48361410
PRJNA649525	SRR12344172	PAIRED	cDNA	Macaca mulatta			43569205
PRJNA649525	SRR12344173	PAIRED	cDNA	Macaca mulatta			44018895
PRJNA649525	SRR12344174	PAIRED	cDNA	Macaca mulatta			42095157
PRJNA649525	SRR12344175	PAIRED	cDNA	Macaca mulatta			41638882
PRJNA649525	SRR12344176	PAIRED	cDNA	Macaca mulatta			41300347
PRJNA649525	SRR12344177	PAIRED	cDNA	Macaca mulatta			34432166
PRJNA649525	SRR12344178	PAIRED	cDNA	Macaca mulatta			42761461
PRJNA650134	SRR12364289	PAIRED	unspecified	Severe acute respiratory syndrome coronavirus 2		Braunschweig_P2_S57_R1_001.fastq	40321507	5512920	91	0.0165067
PRJNA650134	SRR12364306	PAIRED	unspecified	Severe acute respiratory syndrome coronavirus 2		Braunschweig_p5_S15_R1_001.fastq	12067842	1832758	28	0.0152775
PRJNA650134	SRR12364308	PAIRED	unspecified	Severe acute respiratory syndrome coronavirus 2		Braunschweig_p3_S54_R1_001.fastq	30991606	10302337	182	0.0176659
PRJNA656299	SRR12424796	PAIRED	cDNA	Mesocricetus auratus	Lung		51328702
PRJNA656299	SRR12424797	PAIRED	cDNA	Mesocricetus auratus	Lung		52773237
PRJNA656299	SRR12424798	PAIRED	cDNA	Mesocricetus auratus	Lung		52013354
PRJNA656299	SRR12424799	PAIRED	cDNA	Mesocricetus auratus	Lung		5182484
PRJNA656299	SRR12424800	PAIRED	cDNA	Mesocricetus auratus	Lung		53407335
PRJNA656299	SRR12424801	PAIRED	cDNA	Mesocricetus auratus	Lung		53149692
PRJNA656299	SRR12424802	PAIRED	cDNA	Mesocricetus auratus	Lung		43331837
PRJNA656299	SRR12424803	PAIRED	cDNA	Mesocricetus auratus	Lung		46385621
PRJNA656299	SRR12424804	PAIRED	cDNA	Mesocricetus auratus	Lung		53303991
PRJNA656299	SRR12424805	PAIRED	cDNA	Mesocricetus auratus	Lung		50811213
PRJNA656299	SRR12424806	PAIRED	cDNA	Mesocricetus auratus	Lung		53910744
PRJNA656299	SRR12424807	PAIRED	cDNA	Mesocricetus auratus	Lung		49627175
PRJNA656299	SRR12424808	PAIRED	cDNA	Mesocricetus auratus	Lung		50493259
PRJNA656299	SRR12424809	PAIRED	cDNA	Mesocricetus auratus	Lung		47245356
PRJNA656299	SRR12424810	PAIRED	cDNA	Mesocricetus auratus	Lung		49738489
PRJNA656299	SRR12424811	PAIRED	cDNA	Mesocricetus auratus	Lung		47358487
PRJNA656060	SRR12432009	PAIRED	RANDOM	Sarbecovirus			39335609
PRJNA656060	SRR12464727	PAIRED	RANDOM	Sarbecovirus			39335609
PRJNA667999	SRR12799283	PAIRED	RANDOM PCR	Mus musculus	lung		27608466
PRJNA667999	SRR12799284	PAIRED	RANDOM PCR	Mus musculus	lung		28560308
PRJNA667999	SRR12799285	PAIRED	RANDOM PCR	Mus musculus	lung		28421834
PRJNA667999	SRR12799286	PAIRED	RANDOM PCR	Mus musculus	lung		26610929
PRJNA667999	SRR12799287	PAIRED	RANDOM PCR	Mus musculus	lung		35707121
PRJNA667999	SRR12799288	PAIRED	RANDOM PCR	Mus musculus	lung		27942027
PRJNA667999	SRR12799289	PAIRED	RANDOM PCR	Mus musculus	lung		29150126
PRJNA667999	SRR12799290	PAIRED	RANDOM PCR	Mus musculus	lung		25068326
PRJNA667999	SRR12799291	PAIRED	RANDOM PCR	Mus musculus	lung		25298154
PRJNA669811	SRR12833354	PAIRED	cDNA	Mus musculus	Lung		52465859
PRJNA669811	SRR12833355	PAIRED	cDNA	Mus musculus	Lung		51384378
PRJNA669811	SRR12833356	PAIRED	cDNA	Mus musculus	Lung		48206912
PRJNA669811	SRR12833357	PAIRED	cDNA	Mus musculus	Lung		47189791
PRJNA669811	SRR12833358	PAIRED	cDNA	Mus musculus	Lung		85581031
PRJNA669811	SRR12833359	PAIRED	cDNA	Mus musculus	Lung		82301989
PRJNA669811	SRR12833360	PAIRED	cDNA	Mus musculus	Lung		85303543
PRJNA669811	SRR12833361	PAIRED	cDNA	Mus musculus	Lung		82216793
PRJNA669811	SRR12833362	PAIRED	cDNA	Mus musculus	Lung		25653989
PRJNA669811	SRR12833363	PAIRED	cDNA	Mus musculus	Lung		26484347
PRJNA644357	SRR12153154	PAIRED	cDNA	Chlorocebus aethiops aethiops		SARS2_30kb_1_small_1_sequence.fastq	929666	7	0	0
PRJNA646535	SRR12232840	PAIRED	other	Mus musculus	lung		116778498	22708	0	0
PRJNA646535	SRR12232838	PAIRED	other	Mus musculus	lung		142378630	44356	0	0
PRJNA646535	SRR12232839	PAIRED	other	Mus musculus	lung		106994986	23638	1	0.0423048
PRJNA646535	SRR12232841	PAIRED	other	Mus musculus	lung		156847422	18124332	4764	0.262851
PRJNA646535	SRR12232842	PAIRED	other	Mus musculus	lung		136990956	3227662	229	0.0709492
PRJNA646535	SRR12232843	PAIRED	other	Mus musculus	lung		82291212	19166294	2208	0.115202
PRJNA646535	SRR12232844	PAIRED	other	Mus musculus	lung		131065070	28867	15	0.519624
PRJNA646535	SRR12232845	PAIRED	other	Mus musculus	lung		97715302	7110917	8236	1.15822
